# Supplementary material for: Analysis of Cellular Heterogeneity in Immune Microenvironment of Primary Central Nervous System Lymphoma by Single-Cell Sequencing
Source: Front Oncol. 2021 Oct 4;11:683007. doi: 10.3389/fonc.2021.683007 (PMC8523033; doi:10.3389/fonc.2021.683007)
Supplement: Supplementary file 1 [file Table_1.csv]

Supplementary Table 1. B cell recluster marker genes
gene	p_val	avg_log2FC	pct.1	pct.2	p_val_adj	cluster
MALAT1	0	1.023080575	1	0.994	0	B_cell-1
B2M	2.99E-92	0.255950655	1	0.997	5.52E-88	B_cell-1
TMSB4X	2.68E-88	0.255625783	1	0.998	4.95E-84	B_cell-1
NCL	6.53E-43	0.573807396	0.429	0.3	1.20E-38	B_cell-1
HLA-B	1.96E-38	0.292419676	0.851	0.767	3.62E-34	B_cell-1
HLA-A	3.66E-34	0.277235786	0.864	0.788	6.75E-30	B_cell-1
HLA-C	9.63E-29	0.260898852	0.822	0.737	1.78E-24	B_cell-1
GZMK	1.86E-23	0.320587099	0.631	0.536	3.42E-19	B_cell-1
IL32	2.05E-23	0.283576159	0.653	0.556	3.78E-19	B_cell-1
LTB	6.02E-22	0.406547913	0.352	0.257	1.11E-17	B_cell-1
AREG	3.36E-21	0.381562031	0.386	0.295	6.19E-17	B_cell-1
CXCL13	4.95E-21	0.309788392	0.563	0.464	9.13E-17	B_cell-1
NEAT1	6.40E-20	0.438600222	0.267	0.189	1.18E-15	B_cell-1
CCL4	9.98E-19	0.337375941	0.505	0.418	1.84E-14	B_cell-1
CCL5	2.79E-17	0.258644273	0.65	0.569	5.15E-13	B_cell-1
SRGN	1.77E-15	0.295272967	0.484	0.413	3.26E-11	B_cell-1
CCL4L2	1.33E-14	0.399794636	0.3	0.229	2.46E-10	B_cell-1
CD2	1.53E-13	0.296069046	0.355	0.285	2.82E-09	B_cell-1
TXNIP	5.60E-13	0.336854527	0.268	0.204	1.03E-08	B_cell-1
HLA-E	1.17E-12	0.286131183	0.413	0.347	2.16E-08	B_cell-1
VIM	3.75E-10	0.260715575	0.333	0.276	6.93E-06	B_cell-1
FXYD2	3.96E-10	0.254973679	0.306	0.247	7.30E-06	B_cell-1
LGALS1	3.49E-09	0.298045897	0.273	0.22	6.43E-05	B_cell-1
TPM3	6.25E-09	0.266544246	0.267	0.219	0.000115239	B_cell-1
NFKBIA	2.76E-08	0.256557922	0.276	0.226	0.00051002	B_cell-1
RPS5	1.42E-74	0.32631476	0.991	0.97	2.62E-70	B_cell-2
IGHM	3.81E-72	0.696746477	0.72	0.511	7.04E-68	B_cell-2
TCL1A	1.09E-64	0.792373795	0.428	0.227	2.02E-60	B_cell-2
RPLP0	6.60E-64	0.329858651	0.986	0.963	1.22E-59	B_cell-2
GAS5	7.54E-36	0.417429703	0.82	0.682	1.39E-31	B_cell-2
CD79B	3.38E-28	0.595955677	0.356	0.226	6.23E-24	B_cell-2
CD79A	1.04E-27	0.549153099	0.391	0.255	1.92E-23	B_cell-2
SLC25A5	2.60E-25	0.43007557	0.666	0.521	4.79E-21	B_cell-2
SNHG29	8.34E-21	0.367110526	0.756	0.637	1.54E-16	B_cell-2
GRHPR	1.53E-20	0.485298485	0.374	0.257	2.82E-16	B_cell-2
SLC25A6	7.24E-19	0.32546126	0.776	0.671	1.34E-14	B_cell-2
CD37	4.00E-18	0.427293502	0.538	0.411	7.38E-14	B_cell-2
EEF2	4.71E-18	0.360612742	0.76	0.658	8.69E-14	B_cell-2
ZFAS1	4.81E-17	0.395623134	0.565	0.446	8.87E-13	B_cell-2
HSP90AB1	2.05E-14	0.331145993	0.701	0.591	3.78E-10	B_cell-2
NME2	5.47E-14	0.337487335	0.637	0.524	1.01E-09	B_cell-2
C1QBP	6.48E-14	0.4577876	0.278	0.194	1.20E-09	B_cell-2
NAP1L1	1.64E-13	0.327647416	0.678	0.563	3.03E-09	B_cell-2
CLECL1	4.30E-13	0.399615541	0.271	0.188	7.94E-09	B_cell-2
SLC25A3	9.07E-13	0.361975118	0.479	0.373	1.67E-08	B_cell-2
PIM2	1.45E-11	0.357464247	0.272	0.195	2.68E-07	B_cell-2
SNRPF	2.22E-11	0.364139022	0.441	0.34	4.10E-07	B_cell-2
HMGA1	1.84E-10	0.357146811	0.277	0.199	3.40E-06	B_cell-2
EIF3E	5.80E-10	0.314545113	0.559	0.458	1.07E-05	B_cell-2
NME1	7.49E-10	0.366853107	0.261	0.191	1.38E-05	B_cell-2
ERH	5.91E-09	0.318813254	0.366	0.284	0.000109141	B_cell-2
KLRB1	1.41E-08	0.336509846	0.347	0.274	0.000260584	B_cell-2
ATP5F1B	1.63E-08	0.329399565	0.362	0.283	0.000300512	B_cell-2
EIF2S3	3.18E-08	0.324007413	0.283	0.216	0.000586054	B_cell-2
HSPD1	1.45E-07	0.320648251	0.275	0.211	0.002677563	B_cell-2
MT-CYB	0	0.71614314	0.996	0.915	0	B_cell-3
MT-ATP6	0	0.715811801	0.997	0.924	0	B_cell-3
MT-CO2	0	0.713955606	1	0.982	0	B_cell-3
MT-ND4	0	0.708004363	1	0.95	0	B_cell-3
MT-CO1	0	0.692207359	1	0.986	0	B_cell-3
MT-CO3	0	0.685023457	1	0.996	0	B_cell-3
MT-ND2	1.35E-285	0.712525699	0.988	0.873	2.49E-281	B_cell-3
MT-ND3	9.32E-220	0.768552407	0.922	0.746	1.72E-215	B_cell-3
MT-ND1	3.81E-210	0.760243983	0.905	0.698	7.02E-206	B_cell-3
MT-ND5	1.21E-47	0.47088137	0.575	0.438	2.23E-43	B_cell-3
CXCL13	6.58E-13	0.260068422	0.541	0.479	1.21E-08	B_cell-3
CST7	1.85E-10	0.269253973	0.322	0.268	3.42E-06	B_cell-3
TSC22D3	7.27E-10	0.273186074	0.355	0.304	1.34E-05	B_cell-3
GZMB	2.22E-09	0.2538532	0.313	0.258	4.09E-05	B_cell-3
IGHG4	1.79E-281	5.808766553	1	0.023	3.31E-277	Plasma_cell
IGHG1	7.90E-183	4.995636721	0.971	0.036	1.46E-178	Plasma_cell
IGHG3	4.35E-89	8.240721058	1	0.089	8.02E-85	Plasma_cell
IGKC	7.68E-48	8.502596618	0.5	0.037	1.42E-43	Plasma_cell
MZB1	1.86E-16	1.845874237	0.382	0.056	3.43E-12	Plasma_cell
SSR4	2.09E-07	1.389663492	0.647	0.289	0.003858711	Plasma_cell
FKBP11	3.38E-06	1.315657922	0.294	0.077	0.062345632	Plasma_cell
AREG	0.000983072	0.633378455	0.588	0.329	1	Plasma_cell
IGLC2	0.003522919	5.605752692	0.706	0.75	1	Plasma_cell
KLRD1	0.0057891	0.71115531	0.265	0.109	1	Plasma_cell
