# Supplementary material for: Analysis of Cellular Heterogeneity in Immune Microenvironment of Primary Central Nervous System Lymphoma by Single-Cell Sequencing
Source: Front Oncol. 2021 Oct 4;11:683007. doi: 10.3389/fonc.2021.683007 (PMC8523033; doi:10.3389/fonc.2021.683007)
Supplement: Supplementary file 2 [file Table_2.xlsx]

## Sheet: B cell-1
Supplementary Table 2. B cell recluster GO results--B cell-1
GO.ID	Term	Annotated	Significant	Expected	Rank in Fisher.classic	Fisher.elim	Fisher.classic
GO:0019885	antigen processing and presentation of e...	14	5	0.02	2	2.1e-11	2.1e-11
GO:0001916	positive regulation of T cell mediated c...	20	4	0.04	10	3.5e-08	3.5e-08
GO:0002479	antigen processing and presentation of e...	71	5	0.12	13	1.3e-07	1.3e-07
GO:0060333	interferon-gamma-mediated signaling path...	77	5	0.14	15	2e-07	2e-07
GO:0045953	negative regulation of natural killer ce...	13	3	0.02	30	1.3e-06	1.3e-06
GO:0060337	type I interferon signaling pathway	72	4	0.13	48	7e-06	7e-06
GO:0016032	viral process	847	10	1.49	25	0.00011	7e-07
GO:0071346	cellular response to interferon-gamma	149	8	0.26	6	0.00013	1.1e-10
GO:0016045	detection of bacterium	10	2	0.02	104	0.00013	0.00013
GO:0070098	chemokine-mediated signaling pathway	60	3	0.11	106	0.00015	0.00015
GO:0072677	eosinophil migration	11	2	0.02	109	0.00016	0.00016
GO:0033632	regulation of cell-cell adhesion mediate...	11	2	0.02	110	0.00016	0.00016
GO:0043922	negative regulation by host of viral tra...	13	2	0.02	119	0.00023	0.00023
GO:0010820	positive regulation of T cell chemotaxis	14	2	0.02	123	0.00027	0.00027
GO:2001026	regulation of endothelial cell chemotaxi...	15	2	0.03	126	0.00031	0.00031
GO:0030593	neutrophil chemotaxis	76	3	0.13	129	0.00031	0.00031
GO:0042994	cytoplasmic sequestering of transcriptio...	16	2	0.03	135	0.00035	0.00035
GO:2001185	regulation of CD8-positive alpha-beta T…	17	2	0.03	139	0.0004	0.0004
GO:0002544	chronic inflammatory response	17	2	0.03	140	0.0004	0.0004
GO:0033630	positive regulation of cell adhesion med...	18	2	0.03	142	0.00044	0.00044
GO:0002726	positive regulation of T cell cytokine p...	18	2	0.03	143	0.00044	0.00044
GO:0019731	antibacterial humoral response	18	2	0.03	144	0.00044	0.00044
GO:0046641	positive regulation of alpha-beta T cell...	20	2	0.04	153	0.00055	0.00055
GO:0032495	response to muramyl dipeptide	20	2	0.04	154	0.00055	0.00055
GO:0002507	tolerance induction	21	2	0.04	162	0.00061	0.00061
GO:0002347	response to tumor cell	22	2	0.04	165	0.00067	0.00067
GO:0034110	regulation of homotypic cell-cell adhesi...	23	2	0.04	168	0.00073	0.00073
GO:0030049	muscle filament sliding	24	2	0.04	173	0.0008	0.0008
GO:0050729	positive regulation of inflammatory resp...	107	3	0.19	181	0.00084	0.00084
GO:0071216	cellular response to biotic stimulus	184	5	0.32	60	0.00123	1.4e-05
GO:0010977	negative regulation of neuron projection...	138	3	0.24	213	0.00175	0.00175
GO:0010959	regulation of metal ion transport	311	4	0.55	217	0.00195	0.00195
GO:0071347	cellular response to interleukin-1	153	3	0.27	230	0.00235	0.00235
GO:0033209	tumor necrosis factor-mediated signaling...	155	3	0.27	231	0.00243	0.00243
GO:0032760	positive regulation of tumor necrosis fa...	43	2	0.08	233	0.00256	0.00256
GO:0002548	monocyte chemotaxis	44	2	0.08	235	0.00268	0.00268
GO:0042127	regulation of cell population proliferat...	1286	9	2.26	115	0.00285	0.0002
GO:0032655	regulation of interleukin-12 production	46	2	0.08	243	0.00292	0.00292
GO:0043392	negative regulation of DNA binding	49	2	0.09	249	0.00331	0.00331
GO:0050830	defense response to Gram-positive bacter...	49	2	0.09	250	0.00331	0.00331
GO:0061098	positive regulation of protein tyrosine ...	49	2	0.09	251	0.00331	0.00331
GO:0031663	lipopolysaccharide-mediated signaling pa...	51	2	0.09	257	0.00358	0.00358
GO:0032729	positive regulation of interferon-gamma ...	54	2	0.09	262	0.004	0.004
GO:0002237	response to molecule of bacterial origin	255	5	0.45	88	0.00414	6.9e-05
GO:0030279	negative regulation of ossification	55	2	0.1	263	0.00415	0.00415
GO:1903902	positive regulation of viral life cycle	56	2	0.1	265	0.0043	0.0043
GO:0030101	natural killer cell activation	57	2	0.1	266	0.00445	0.00445
GO:0032677	regulation of interleukin-8 production	58	2	0.1	269	0.00461	0.00461
GO:0022409	positive regulation of cell-cell adhesio...	234	5	0.41	81	0.00471	4.6e-05
GO:0045055	regulated exocytosis	660	5	1.16	278	0.00512	0.00512
GO:0032507	maintenance of protein location in cell	63	2	0.11	280	0.00541	0.00541
GO:0042119	neutrophil activation	418	4	0.73	281	0.00565	0.00565
GO:1903706	regulation of hemopoiesis	429	4	0.75	288	0.00619	0.00619
GO:0140131	positive regulation of lymphocyte chemot...	18	3	0.03	39	0.00643	3.8e-06
GO:0043270	positive regulation of ion transport	223	3	0.39	290	0.00675	0.00675
GO:0002521	leukocyte differentiation	440	4	0.77	292	0.00676	0.00676
GO:0014070	response to organic cyclic compound	710	5	1.25	294	0.00697	0.00697
GO:0050863	regulation of T cell activation	282	5	0.5	100	0.00718	0.00011
GO:0002444	myeloid leukocyte mediated immunity	463	4	0.81	298	0.00808	0.00808
GO:0032088	negative regulation of NF-kappaB transcr...	78	2	0.14	299	0.00819	0.00819
GO:0071356	cellular response to tumor necrosis fact...	244	5	0.43	85	0.00831	5.6e-05
GO:0002696	positive regulation of leukocyte activat...	295	5	0.52	105	0.0094	0.00014
GO:0050678	regulation of epithelial cell proliferat...	259	3	0.46	311	0.01016	0.01016
GO:0071222	cellular response to lipopolysaccharide	152	4	0.27	103	0.01144	0.00013
GO:0050708	regulation of protein secretion	271	3	0.48	320	0.01148	0.01148
GO:1901222	regulation of NIK/NF-kappaB signaling	94	2	0.17	323	0.01172	0.01172
GO:0051928	positive regulation of calcium ion trans...	97	2	0.17	327	0.01244	0.01244
GO:0002576	platelet degranulation	99	2	0.17	330	0.01294	0.01294
GO:0071219	cellular response to molecule of bacteri...	160	4	0.28	108	0.01323	0.00016
GO:0002791	regulation of peptide secretion	289	3	0.51	333	0.01365	0.01365
GO:0042493	response to drug	298	3	0.52	334	0.01482	0.01482
GO:0050673	epithelial cell proliferation	299	3	0.53	335	0.01495	0.01495
GO:0032355	response to estradiol	108	2	0.19	337	0.01526	0.01526
GO:0030098	lymphocyte differentiation	307	3	0.54	340	0.01604	0.01604
GO:0044344	cellular response to fibroblast growth f...	114	2	0.2	342	0.0169	0.0169
GO:0002524	hypersensitivity	10	1	0.02	343	0.01744	0.01744
GO:0010745	negative regulation of macrophage derive...	10	1	0.02	344	0.01744	0.01744
GO:1901838	positive regulation of transcription of ...	10	1	0.02	345	0.01744	0.01744
GO:0045741	positive regulation of epidermal growth ...	10	1	0.02	346	0.01744	0.01744
GO:0033033	negative regulation of myeloid cell apop...	10	1	0.02	347	0.01744	0.01744
GO:0032736	positive regulation of interleukin-13 pr...	10	1	0.02	348	0.01744	0.01744
GO:0051351	positive regulation of ligase activity	10	1	0.02	349	0.01744	0.01744
GO:0033993	response to lipid	687	6	1.21	190	0.01766	0.00098
GO:0071774	response to fibroblast growth factor	118	2	0.21	351	0.01804	0.01804
GO:0042542	response to hydrogen peroxide	118	2	0.21	352	0.01804	0.01804
GO:0007186	G protein-coupled receptor signaling pat...	591	4	1.04	353	0.0185	0.0185
GO:0002366	leukocyte activation involved in immune ...	592	4	1.04	354	0.0186	0.0186
GO:0010608	posttranscriptional regulation of gene e...	595	4	1.05	358	0.01892	0.01892
GO:0002263	cell activation involved in immune respo...	596	4	1.05	359	0.01902	0.01902
GO:0036376	sodium ion export across plasma membrane	11	1	0.02	360	0.01916	0.01916
GO:0042976	activation of Janus kinase activity	11	1	0.02	361	0.01916	0.01916
GO:0071888	macrophage apoptotic process	11	1	0.02	362	0.01916	0.01916
GO:0070234	positive regulation of T cell apoptotic ...	11	1	0.02	363	0.01916	0.01916
GO:2000291	regulation of myoblast proliferation	11	1	0.02	364	0.01916	0.01916
GO:2001198	regulation of dendritic cell differentia...	11	1	0.02	365	0.01916	0.01916
GO:2001028	positive regulation of endothelial cell ...	11	1	0.02	366	0.01916	0.01916
GO:0045727	positive regulation of translation	122	2	0.21	367	0.01921	0.01921
GO:0097435	supramolecular fiber organization	601	4	1.06	368	0.01955	0.01955
GO:0006606	protein import into nucleus	127	2	0.22	371	0.02071	0.02071
GO:0009719	response to endogenous stimulus	1282	6	2.25	372	0.02077	0.02077
GO:1903025	regulation of RNA polymerase II regulato...	12	1	0.02	373	0.02089	0.02089
GO:0050710	negative regulation of cytokine secretio...	12	1	0.02	374	0.02089	0.02089
GO:0061377	mammary gland lobule development	12	1	0.02	375	0.02089	0.02089
GO:0060602	branch elongation of an epithelium	12	1	0.02	376	0.02089	0.02089
GO:0070307	lens fiber cell development	12	1	0.02	377	0.02089	0.02089
GO:0002863	positive regulation of inflammatory resp...	12	1	0.02	378	0.02089	0.02089
GO:0051340	regulation of ligase activity	12	1	0.02	379	0.02089	0.02089
GO:0060749	mammary gland alveolus development	12	1	0.02	380	0.02089	0.02089
GO:2000774	positive regulation of cellular senescen...	12	1	0.02	381	0.02089	0.02089
GO:0006417	regulation of translation	342	3	0.6	384	0.02133	0.02133
GO:2001171	positive regulation of ATP biosynthetic ...	13	1	0.02	388	0.02261	0.02261
GO:1900121	negative regulation of receptor binding	13	1	0.02	389	0.02261	0.02261
GO:0090026	positive regulation of monocyte chemotax...	13	1	0.02	390	0.02261	0.02261
GO:0033623	regulation of integrin activation	13	1	0.02	391	0.02261	0.02261
GO:0051782	negative regulation of cell division	13	1	0.02	392	0.02261	0.02261
GO:0032656	regulation of interleukin-13 production	13	1	0.02	393	0.02261	0.02261
GO:0070431	nucleotide-binding oligomerization domai...	13	1	0.02	394	0.02261	0.02261
GO:0030502	negative regulation of bone mineralizati...	13	1	0.02	395	0.02261	0.02261
GO:0043547	positive regulation of GTPase activity	350	3	0.61	396	0.02266	0.02266
GO:0008284	positive regulation of cell population p...	711	6	1.25	198	0.02305	0.00117
GO:0002467	germinal center formation	14	1	0.02	397	0.02433	0.02433
GO:1901836	regulation of transcription of nucleolar...	14	1	0.02	398	0.02433	0.02433
GO:0051023	regulation of immunoglobulin secretion	14	1	0.02	399	0.02433	0.02433
GO:0002643	regulation of tolerance induction	14	1	0.02	400	0.02433	0.02433
GO:0090343	positive regulation of cell aging	14	1	0.02	401	0.02433	0.02433
GO:0045109	intermediate filament organization	14	1	0.02	402	0.02433	0.02433
GO:0009306	protein secretion	360	3	0.63	403	0.02438	0.02438
GO:0035592	establishment of protein localization to...	360	3	0.63	404	0.02438	0.02438
GO:0050679	positive regulation of epithelial cell p...	140	2	0.25	406	0.02484	0.02484
GO:0050727	regulation of inflammatory response	267	5	0.47	95	0.02511	8.6e-05
GO:0071692	protein localization to extracellular re...	366	3	0.64	408	0.02545	0.02545
GO:0051450	myoblast proliferation	15	1	0.03	410	0.02605	0.02605
GO:0032717	negative regulation of interleukin-8 pro...	15	1	0.03	411	0.02605	0.02605
GO:0070230	positive regulation of lymphocyte apopto...	15	1	0.03	412	0.02605	0.02605
GO:0070233	negative regulation of T cell apoptotic ...	15	1	0.03	413	0.02605	0.02605
GO:0048535	lymph node development	15	1	0.03	414	0.02605	0.02605
GO:0002864	regulation of acute inflammatory respons...	15	1	0.03	415	0.02605	0.02605
GO:0032616	interleukin-13 production	15	1	0.03	416	0.02605	0.02605
GO:0051170	import into nucleus	148	2	0.26	418	0.02754	0.02754
GO:0060965	negative regulation of gene silencing by...	16	1	0.03	419	0.02776	0.02776
GO:0002418	immune response to tumor cell	16	1	0.03	420	0.02776	0.02776
GO:0060444	branching involved in mammary gland duct...	16	1	0.03	421	0.02776	0.02776
GO:1900373	positive regulation of purine nucleotide...	16	1	0.03	422	0.02776	0.02776
GO:0030810	positive regulation of nucleotide biosyn...	16	1	0.03	423	0.02776	0.02776
GO:0035994	response to muscle stretch	16	1	0.03	424	0.02776	0.02776
GO:0034250	positive regulation of cellular amide me...	150	2	0.26	426	0.02823	0.02823
GO:0038061	NIK/NF-kappaB signaling	151	2	0.27	427	0.02858	0.02858
GO:0070374	positive regulation of ERK1 and ERK2 cas...	151	2	0.27	428	0.02858	0.02858
GO:0050870	positive regulation of T cell activation	185	4	0.33	124	0.02867	0.00028
GO:0002790	peptide secretion	386	3	0.68	429	0.02919	0.02919
GO:0010888	negative regulation of lipid storage	17	1	0.03	430	0.02947	0.02947
GO:0010875	positive regulation of cholesterol efflu...	17	1	0.03	431	0.02947	0.02947
GO:0048305	immunoglobulin secretion	17	1	0.03	432	0.02947	0.02947
GO:1990000	amyloid fibril formation	17	1	0.03	433	0.02947	0.02947
GO:0042790	nucleolar large rRNA transcription by RN...	17	1	0.03	434	0.02947	0.02947
GO:0009749	response to glucose	155	2	0.27	436	0.02999	0.02999
GO:0007267	cell-cell signaling	1400	6	2.46	437	0.03066	0.03066
GO:0034248	regulation of cellular amide metabolic p...	395	3	0.69	438	0.03097	0.03097
GO:0009746	response to hexose	158	2	0.28	439	0.03106	0.03106
GO:0010759	positive regulation of macrophage chemot...	18	1	0.03	440	0.03118	0.03118
GO:0060967	negative regulation of gene silencing by...	18	1	0.03	441	0.03118	0.03118
GO:0002438	acute inflammatory response to antigenic...	18	1	0.03	442	0.03118	0.03118
GO:0002675	positive regulation of acute inflammator...	18	1	0.03	443	0.03118	0.03118
GO:0060149	negative regulation of posttranscription...	18	1	0.03	444	0.03118	0.03118
GO:0006925	inflammatory cell apoptotic process	18	1	0.03	445	0.03118	0.03118
GO:2000678	negative regulation of transcription reg...	18	1	0.03	446	0.03118	0.03118
GO:0032816	positive regulation of natural killer ce...	18	1	0.03	447	0.03118	0.03118
GO:0071677	positive regulation of mononuclear cell ...	18	1	0.03	448	0.03118	0.03118
GO:0002313	mature B cell differentiation involved i...	18	1	0.03	449	0.03118	0.03118
GO:2001169	regulation of ATP biosynthetic process	18	1	0.03	450	0.03118	0.03118
GO:0034284	response to monosaccharide	162	2	0.28	453	0.03252	0.03252
GO:0090025	regulation of monocyte chemotaxis	19	1	0.03	455	0.03288	0.03288
GO:0019221	cytokine-mediated signaling pathway	630	13	1.11	1	0.03303	5.9e-12
GO:0043312	neutrophil degranulation	406	3	0.71	456	0.03321	0.03321
GO:0010628	positive regulation of gene expression	1821	10	3.2	158	0.03343	0.00057
GO:0002283	neutrophil activation involved in immune...	409	3	0.72	458	0.03384	0.03384
GO:1903039	positive regulation of leukocyte cell-ce...	201	4	0.35	136	0.03399	0.00038
GO:0002407	dendritic cell chemotaxis	20	1	0.04	460	0.03458	0.03458
GO:0045954	positive regulation of natural killer ce...	20	1	0.04	461	0.03458	0.03458
GO:0032967	positive regulation of collagen biosynth...	20	1	0.04	462	0.03458	0.03458
GO:0010155	regulation of proton transport	20	1	0.04	463	0.03458	0.03458
GO:1901223	negative regulation of NIK/NF-kappaB sig...	20	1	0.04	464	0.03458	0.03458
GO:0048026	positive regulation of mRNA splicing vi…	20	1	0.04	465	0.03458	0.03458
GO:0002446	neutrophil mediated immunity	416	3	0.73	466	0.03533	0.03533
GO:0045089	positive regulation of innate immune res...	170	2	0.3	467	0.03552	0.03552
GO:0043087	regulation of GTPase activity	419	3	0.74	470	0.03598	0.03598
GO:1900120	regulation of receptor binding	21	1	0.04	471	0.03628	0.03628
GO:0070168	negative regulation of biomineral tissue...	21	1	0.04	472	0.03628	0.03628
GO:0010714	positive regulation of collagen metaboli...	21	1	0.04	473	0.03628	0.03628
GO:0010743	regulation of macrophage derived foam ce...	21	1	0.04	474	0.03628	0.03628
GO:0033032	regulation of myeloid cell apoptotic pro...	21	1	0.04	475	0.03628	0.03628
GO:0110150	negative regulation of biomineralization	21	1	0.04	476	0.03628	0.03628
GO:0003401	axis elongation	21	1	0.04	477	0.03628	0.03628
GO:0045943	positive regulation of transcription by ...	21	1	0.04	478	0.03628	0.03628
GO:0009612	response to mechanical stimulus	172	2	0.3	479	0.03629	0.03629
GO:0017038	protein import	175	2	0.31	482	0.03745	0.03745
GO:0033622	integrin activation	22	1	0.04	483	0.03798	0.03798
GO:0042026	protein refolding	22	1	0.04	484	0.03798	0.03798
GO:0002717	positive regulation of natural killer ce...	22	1	0.04	485	0.03798	0.03798
GO:0032496	response to lipopolysaccharide	243	4	0.43	172	0.03802	0.00078
GO:0042605	peptide antigen binding	18	4	0.03	1	1.7e-08	1.7e-08
GO:0048020	CCR chemokine receptor binding	27	3	0.04	8	1.1e-05	1.1e-05
GO:0008009	chemokine activity	30	3	0.05	9	1.5e-05	1.5e-05
GO:0005125	cytokine activity	121	6	0.2	2	0.00028	3.3e-08
GO:0042802	identical protein binding	1587	8	2.61	14	0.00278	0.00278
GO:0043621	protein self-association	51	2	0.08	15	0.00315	0.00315
GO:0045236	CXCR chemokine receptor binding	11	1	0.02	17	0.01797	0.01797
GO:0005212	structural constituent of eye lens	11	1	0.02	18	0.01797	0.01797
GO:0016004	phospholipase activator activity	11	1	0.02	19	0.01797	0.01797
GO:0060229	lipase activator activity	11	1	0.02	20	0.01797	0.01797
GO:0030296	protein tyrosine kinase activator activi...	14	1	0.02	21	0.02281	0.02281
GO:0044877	protein-containing complex binding	1078	5	1.77	23	0.02833	0.02833
GO:0048019	receptor antagonist activity	19	1	0.03	24	0.03084	0.03084
GO:0042288	MHC class I protein binding	19	1	0.03	25	0.03084	0.03084
GO:0042056	chemoattractant activity	20	1	0.03	26	0.03244	0.03244
GO:0017134	fibroblast growth factor binding	20	1	0.03	27	0.03244	0.03244
GO:0004435	phosphatidylinositol phospholipase C act...	20	1	0.03	28	0.03244	0.03244
GO:0004629	phospholipase C activity	21	1	0.03	29	0.03403	0.03403
GO:0003723	RNA binding	1537	6	2.53	30	0.03425	0.03425
GO:0005102	signaling receptor binding	1179	10	1.94	7	0.03542	7.3e-06
GO:0008139	nuclear localization sequence binding	22	1	0.04	31	0.03562	0.03562
GO:0043236	laminin binding	22	1	0.04	32	0.03562	0.03562
GO:0003785	actin monomer binding	25	1	0.04	33	0.04039	0.04039
GO:0048027	mRNA 5'-UTR binding	26	1	0.04	34	0.04197	0.04197
GO:0015662	ion transmembrane transporter activity …	26	1	0.04	35	0.04197	0.04197
GO:0030547	receptor inhibitor activity	26	1	0.04	36	0.04197	0.04197
GO:0005164	tumor necrosis factor receptor binding	28	1	0.05	37	0.04513	0.04513
GO:0005154	epidermal growth factor receptor binding	28	1	0.05	38	0.04513	0.04513
GO:0017080	sodium channel regulator activity	30	1	0.05	39	0.04828	0.04828
GO:0035198	miRNA binding	31	1	0.05	40	0.04985	0.04985
GO:0051059	NF-kappaB binding	31	1	0.05	41	0.04985	0.04985
GO:0042287	MHC protein binding	32	1	0.05	42	0.05141	0.05141
GO:0042162	telomeric DNA binding	34	1	0.06	43	0.05454	0.05454
GO:0061980	regulatory RNA binding	41	1	0.07	44	0.06541	0.06541
GO:0032813	tumor necrosis factor receptor superfami...	41	1	0.07	45	0.06541	0.06541
GO:0050840	extracellular matrix binding	42	1	0.07	46	0.06696	0.06696
GO:0005048	signal sequence binding	43	1	0.07	47	0.0685	0.0685
GO:0019829	ATPase-coupled cation transmembrane tran...	47	1	0.08	48	0.07463	0.07463
GO:0031625	ubiquitin protein ligase binding	283	2	0.47	49	0.07828	0.07828
GO:0042625	ATPase-coupled ion transmembrane transpo...	50	1	0.08	50	0.07921	0.07921
GO:0044389	ubiquitin-like protein ligase binding	301	2	0.5	52	0.08703	0.08703
GO:0097110	scaffold protein binding	56	1	0.09	53	0.0883	0.0883
GO:0030971	receptor tyrosine kinase binding	60	1	0.1	54	0.09432	0.09432
GO:0030295	protein kinase activator activity	66	1	0.11	55	0.10327	0.10327
GO:0003725	double-stranded RNA binding	70	1	0.12	56	0.10919	0.10919
GO:0019209	kinase activator activity	72	1	0.12	57	0.11213	0.11213
GO:0005200	structural constituent of cytoskeleton	73	1	0.12	58	0.1136	0.1136
GO:0004620	phospholipase activity	74	1	0.12	59	0.11507	0.11507
GO:0008081	phosphoric diester hydrolase activity	74	1	0.12	60	0.11507	0.11507
GO:0004252	serine-type endopeptidase activity	77	1	0.13	61	0.11945	0.11945
GO:0042626	ATPase-coupled transmembrane transporter...	78	1	0.13	62	0.12091	0.12091
GO:0003779	actin binding	368	2	0.61	63	0.12193	0.12193
GO:0015399	primary active transmembrane transporter...	84	1	0.14	64	0.12961	0.12961
GO:1990782	protein tyrosine kinase binding	84	1	0.14	65	0.12961	0.12961
GO:0016298	lipase activity	88	1	0.14	66	0.13536	0.13536
GO:0008236	serine-type peptidase activity	92	1	0.15	67	0.14108	0.14108
GO:0051087	chaperone binding	94	1	0.15	68	0.14392	0.14392
GO:0099106	ion channel regulator activity	95	1	0.16	69	0.14534	0.14534
GO:0017171	serine hydrolase activity	95	1	0.16	70	0.14534	0.14534
GO:0008083	growth factor activity	97	1	0.16	71	0.14817	0.14817
GO:0015081	sodium ion transmembrane transporter act...	98	1	0.16	72	0.14958	0.14958
GO:0070851	growth factor receptor binding	98	1	0.16	73	0.14958	0.14958
GO:0008201	heparin binding	104	1	0.17	74	0.15801	0.15801
GO:0019838	growth factor binding	106	1	0.17	75	0.1608	0.1608
GO:0015079	potassium ion transmembrane transporter ...	108	1	0.18	76	0.16358	0.16358
GO:0016247	channel regulator activity	119	1	0.2	77	0.17873	0.17873
GO:0005126	cytokine receptor binding	174	4	0.29	13	0.17942	0.00017
GO:0043021	ribonucleoprotein complex binding	127	1	0.21	78	0.18958	0.18958
GO:0005515	protein binding	10921	22	17.98	22	0.19959	0.02564
GO:0005539	glycosaminoglycan binding	146	1	0.24	79	0.2148	0.2148
GO:0042803	protein homodimerization activity	541	2	0.89	80	0.22319	0.22319
GO:0019899	enzyme binding	2003	5	3.3	81	0.22611	0.22611
GO:0022853	active ion transmembrane transporter act...	160	1	0.26	82	0.2329	0.2329
GO:0019887	protein kinase regulator activity	161	1	0.27	83	0.23417	0.23417
GO:0042277	peptide binding	228	5	0.38	10	0.25048	2.9e-05
GO:0051015	actin filament binding	174	1	0.29	84	0.2506	0.2506
GO:0008022	protein C-terminus binding	179	1	0.29	85	0.25682	0.25682
GO:0030246	carbohydrate binding	184	1	0.3	86	0.263	0.263
GO:1901681	sulfur compound binding	185	1	0.3	87	0.26423	0.26423
GO:0019207	kinase regulator activity	188	1	0.31	88	0.26791	0.26791
GO:0033218	amide binding	289	5	0.48	12	0.31126	9.1e-05
GO:0061629	RNA polymerase II-specific DNA-binding t...	239	1	0.39	90	0.32779	0.32779
GO:0022804	active transmembrane transporter activit...	247	1	0.41	91	0.33674	0.33674
GO:0004857	enzyme inhibitor activity	258	1	0.42	92	0.34887	0.34887
GO:0004175	endopeptidase activity	265	1	0.44	93	0.35648	0.35648
GO:0015077	monovalent inorganic cation transmembran...	268	1	0.44	94	0.35971	0.35971
GO:0003729	mRNA binding	269	1	0.44	95	0.36079	0.36079
GO:0046873	metal ion transmembrane transporter acti...	299	1	0.49	96	0.39224	0.39224
GO:0046983	protein dimerization activity	827	2	1.36	97	0.3987	0.3987
GO:0140297	DNA-binding transcription factor binding	308	1	0.51	98	0.40138	0.40138
GO:0030234	enzyme regulator activity	837	2	1.38	99	0.40464	0.40464
GO:0042578	phosphoric ester hydrolase activity	314	1	0.52	100	0.4074	0.4074
GO:0008092	cytoskeletal protein binding	854	2	1.41	102	0.41469	0.41469
GO:0008233	peptidase activity	404	1	0.67	103	0.49107	0.49107
GO:0003676	nucleic acid binding	3367	6	5.54	104	0.49114	0.49114
GO:0022890	inorganic cation transmembrane transport...	412	1	0.68	105	0.49793	0.49793
GO:0008047	enzyme activator activity	446	1	0.73	106	0.52612	0.52612
GO:0008324	cation transmembrane transporter activit...	452	1	0.74	107	0.53094	0.53094
GO:0005198	structural molecule activity	485	1	0.8	108	0.5566	0.5566
GO:0004672	protein kinase activity	495	1	0.81	109	0.56411	0.56411
GO:0008134	transcription factor binding	553	1	0.91	110	0.6053	0.6053
GO:0015318	inorganic molecular entity transmembrane...	571	1	0.94	111	0.61731	0.61731
GO:0016773	phosphotransferase activity alcohol gro…	585	1	0.96	112	0.62641	0.62641
GO:0019901	protein kinase binding	592	1	0.97	113	0.63088	0.63088
GO:0016788	hydrolase activity acting on ester bond…	616	1	1.01	114	0.64583	0.64583
GO:0015075	ion transmembrane transporter activity	619	1	1.02	115	0.64766	0.64766
GO:0016301	kinase activity	636	1	1.05	116	0.65784	0.65784
GO:0019904	protein domain specific binding	637	1	1.05	117	0.65843	0.65843
GO:0019900	kinase binding	671	1	1.1	118	0.67792	0.67792
GO:0060089	molecular transducer activity	675	1	1.11	119	0.68015	0.68015
GO:0038023	signaling receptor activity	675	1	1.11	120	0.68015	0.68015
GO:0022857	transmembrane transporter activity	747	1	1.23	121	0.71773	0.71773
GO:0016772	transferase activity transferring phosp…	770	1	1.27	122	0.72882	0.72882
GO:0003674	molecular_function	13438	23	22.12	101	0.73227	0.40846
GO:0005215	transporter activity	859	1	1.41	123	0.76792	0.76792
GO:0005488	binding	12487	22	20.56	89	0.79563	0.28186
GO:0140096	catalytic activity acting on a protein	1770	2	2.91	124	0.80792	0.80792
GO:0016787	hydrolase activity	1956	2	3.22	125	0.85245	0.85245
GO:1901363	heterocyclic compound binding	4918	6	8.1	126	0.87343	0.87343
GO:0097159	organic cyclic compound binding	4975	6	8.19	127	0.88159	0.88159
GO:0098772	molecular function regulator	2909	8	4.79	51	0.8844	0.08683
GO:0043565	sequence-specific DNA binding	1337	1	2.2	128	0.90129	0.90129
GO:0097367	carbohydrate derivative binding	1855	1	3.05	129	0.96234	0.96234
GO:0016740	transferase activity	1904	1	3.13	130	0.9657	0.9657
GO:0003677	DNA binding	2021	1	3.33	131	0.97259	0.97259
GO:0043168	anion binding	2338	1	3.85	132	0.98524	0.98524
GO:0003824	catalytic activity	4582	2	7.54	133	0.9987	0.9987
GO:0043167	ion binding	5096	1	8.39	134	0.99997	0.99997
GO:0042379	chemokine receptor binding	39	3	0.06	11	1	3.4e-05
GO:0048018	receptor ligand activity	264	6	0.43	4	1	3.3e-06
GO:0003823	antigen binding	59	4	0.1	3	1	2.4e-06
GO:0030545	receptor regulator activity	295	6	0.49	6	1	6.3e-06
GO:0030546	signaling receptor activator activity	268	6	0.44	5	1	3.6e-06
GO:0001664	G protein-coupled receptor binding	199	3	0.33	16	1	0.00409
GO:0000014	single-stranded DNA endodeoxyribonucleas...	10	0	0.02	135	1	1
GO:0000030	mannosyltransferase activity	27	0	0.04	136	1	1
GO:0000049	tRNA binding	63	0	0.1	137	1	1
GO:0000062	fatty-acyl-CoA binding	18	0	0.03	138	1	1
GO:0000146	microfilament motor activity	20	0	0.03	139	1	1
GO:0000149	SNARE binding	106	0	0.17	140	1	1
GO:0000166	nucleotide binding	1834	0	3.02	141	1	1
GO:0000175	3'-5'-exoribonuclease activity	34	0	0.06	142	1	1
GO:0000217	DNA secondary structure binding	32	0	0.05	143	1	1
GO:0000287	magnesium ion binding	183	0	0.3	144	1	1
GO:0000295	adenine nucleotide transmembrane transpo...	27	0	0.04	145	1	1
GO:0000339	RNA cap binding	17	0	0.03	146	1	1
GO:0000340	RNA 7-methylguanosine cap binding	11	0	0.02	147	1	1
GO:0000400	four-way junction DNA binding	17	0	0.03	148	1	1
GO:0000774	adenyl-nucleotide exchange factor activi...	10	0	0.02	149	1	1
GO:0000900	translation repressor activity mRNA reg…	15	0	0.02	150	1	1
GO:0000976	transcription regulatory region sequence...	1174	0	1.93	151	1	1
GO:0000977	RNA polymerase II transcription regulato...	1097	0	1.81	152	1	1
GO:0000978	RNA polymerase II cis-regulatory region ...	902	0	1.48	153	1	1
GO:0000979	RNA polymerase II core promoter sequence...	21	0	0.03	154	1	1
GO:0000981	DNA-binding transcription factor activit...	1121	0	1.85	155	1	1
GO:0000987	cis-regulatory region sequence-specific ...	918	0	1.51	156	1	1
GO:0000993	RNA polymerase II complex binding	35	0	0.06	157	1	1
GO:0001046	core promoter sequence-specific DNA bind...	42	0	0.07	158	1	1
GO:0001067	regulatory region nucleic acid binding	1175	0	1.93	159	1	1
GO:0001085	RNA polymerase II transcription factor b...	42	0	0.07	160	1	1
GO:0001091	RNA polymerase II general transcription ...	17	0	0.03	161	1	1
GO:0001094	TFIID-class transcription factor complex...	10	0	0.02	162	1	1
GO:0001098	basal transcription machinery binding	52	0	0.09	163	1	1
GO:0001099	basal RNA polymerase II transcription ma...	52	0	0.09	164	1	1
GO:0001102	RNA polymerase II activating transcripti...	40	0	0.07	165	1	1
GO:0001103	RNA polymerase II repressing transcripti...	32	0	0.05	166	1	1
GO:0001161	intronic transcription regulatory region...	14	0	0.02	167	1	1
GO:0001162	RNA polymerase II intronic transcription...	12	0	0.02	168	1	1
GO:0001216	DNA-binding transcription activator acti...	374	0	0.62	169	1	1
GO:0001217	DNA-binding transcription repressor acti...	283	0	0.47	170	1	1
GO:0001221	transcription cofactor binding	40	0	0.07	171	1	1
GO:0001222	transcription corepressor binding	14	0	0.02	172	1	1
GO:0001223	transcription coactivator binding	19	0	0.03	173	1	1
GO:0001227	DNA-binding transcription repressor acti...	282	0	0.46	174	1	1
GO:0001228	DNA-binding transcription activator acti...	371	0	0.61	175	1	1
GO:0001530	lipopolysaccharide binding	19	0	0.03	176	1	1
GO:0001540	amyloid-beta binding	73	0	0.12	177	1	1
GO:0001614	purinergic nucleotide receptor activity	14	0	0.02	178	1	1
GO:0001618	virus receptor activity	59	0	0.1	179	1	1
GO:0001637	G protein-coupled chemoattractant recept...	19	0	0.03	180	1	1
GO:0001653	peptide receptor activity	72	0	0.12	181	1	1
GO:0001671	ATPase activator activity	23	0	0.04	182	1	1
GO:0001784	phosphotyrosine residue binding	39	0	0.06	183	1	1
GO:0001786	phosphatidylserine binding	44	0	0.07	184	1	1
GO:0001846	opsonin binding	10	0	0.02	185	1	1
GO:0001848	complement binding	11	0	0.02	186	1	1
GO:0001882	nucleoside binding	336	0	0.55	187	1	1
GO:0001883	purine nucleoside binding	331	0	0.54	188	1	1
GO:0001965	G-protein alpha-subunit binding	21	0	0.03	189	1	1
GO:0001968	fibronectin binding	20	0	0.03	190	1	1
GO:0001972	retinoic acid binding	11	0	0.02	191	1	1
GO:0002020	protease binding	104	0	0.17	192	1	1
GO:0002039	p53 binding	60	0	0.1	193	1	1
GO:0002161	aminoacyl-tRNA editing activity	11	0	0.02	194	1	1
GO:0003678	DNA helicase activity	73	0	0.12	195	1	1
GO:0003682	chromatin binding	512	0	0.84	196	1	1
GO:0003684	damaged DNA binding	62	0	0.1	197	1	1
GO:0003688	DNA replication origin binding	22	0	0.04	198	1	1
GO:0003690	double-stranded DNA binding	1323	0	2.18	199	1	1
GO:0003697	single-stranded DNA binding	107	0	0.18	200	1	1

## Sheet: B cell-2
Supplementary Table 2. B cell recluster GO results -- B cell-2
GO.ID	Term	Annotated	Significant	Expected	Rank in Fisher.classic	Fisher.elim	Fisher.classic
GO:0000184	nuclear-transcribed mRNA catabolic proce...	116	7	0.49	11	5.6e-07	9.9e-07
GO:0006413	translational initiation	177	9	0.75	7	5.1e-06	1.1e-07
GO:0042407	cristae formation	33	4	0.14	22	1.1e-05	1.5e-05
GO:0045727	positive regulation of translation	122	6	0.52	25	1.2e-05	2e-05
GO:0006614	SRP-dependent cotranslational protein ta...	94	5	0.4	34	4.8e-05	7.1e-05
GO:0042776	mitochondrial ATP synthesis coupled prot...	22	3	0.09	39	0.00011	0.00014
GO:0050853	B cell receptor signaling pathway	71	4	0.3	47	0.00023	0.00032
GO:0002181	cytoplasmic translation	95	6	0.4	14	0.0004	4.8e-06
GO:0006958	complement activation classical pathway	36	3	0.15	58	0.00047	0.0006
GO:0019083	viral transcription	170	5	0.72	72	0.00076	0.0011
GO:0001731	formation of translation preinitiation c...	10	2	0.04	64	0.00078	0.00092
GO:0006183	GTP biosynthetic process	10	2	0.04	65	0.00078	0.00092
GO:0019042	viral latency	11	2	0.05	73	0.00095	0.00112
GO:0006241	CTP biosynthetic process	13	2	0.06	83	0.00134	0.00158
GO:0022618	ribonucleoprotein complex assembly	181	10	0.77	1	0.00139	9.1e-09
GO:0008637	apoptotic mitochondrial changes	116	4	0.49	94	0.00147	0.002
GO:0006268	DNA unwinding involved in DNA replicatio...	15	2	0.06	97	0.0018	0.00211
GO:0006450	regulation of translational fidelity	17	2	0.07	100	0.00231	0.00272
GO:0006123	mitochondrial electron transport cytoch…	17	2	0.07	101	0.00231	0.00272
GO:0000028	ribosomal small subunit assembly	18	2	0.08	104	0.0026	0.00305
GO:0042113	B cell activation	230	5	0.98	115	0.00287	0.00412
GO:0051131	chaperone-mediated protein complex assem...	20	2	0.08	113	0.00321	0.00377
GO:0061621	canonical glycolysis	23	2	0.1	128	0.00423	0.00498
GO:0044403	symbiotic process	878	15	3.73	20	0.00438	7.8e-06
GO:0006119	oxidative phosphorylation	126	8	0.53	6	0.00483	1.1e-07
GO:0015949	nucleobase-containing small molecule int...	25	2	0.11	136	0.00499	0.00587
GO:0015867	ATP transport	25	2	0.11	137	0.00499	0.00587
GO:0008334	histone mRNA metabolic process	25	2	0.11	138	0.00499	0.00587
GO:0050821	protein stabilization	164	4	0.7	144	0.00514	0.00689
GO:0006910	phagocytosis recognition	26	2	0.11	141	0.00539	0.00634
GO:0042981	regulation of apoptotic process	1246	12	5.29	166	0.0054	0.01061
GO:0000027	ribosomal large subunit assembly	27	2	0.11	142	0.00581	0.00682
GO:0045471	response to ethanol	88	3	0.37	149	0.00617	0.00777
GO:0071353	cellular response to interleukin-4	28	2	0.12	147	0.00624	0.00733
GO:0062125	regulation of mitochondrial gene express...	30	2	0.13	155	0.00714	0.00838
GO:0006626	protein targeting to mitochondrion	95	3	0.4	163	0.00763	0.00957
GO:1902600	proton transmembrane transport	124	6	0.53	27	0.00804	2.2e-05
GO:0006369	termination of RNA polymerase II transcr...	33	2	0.14	165	0.0086	0.01008
GO:0008283	cell population proliferation	1508	13	6.4	203	0.00938	0.01857
GO:0042220	response to cocaine	36	2	0.15	174	0.01018	0.01192
GO:0045070	positive regulation of viral genome repl...	36	2	0.15	175	0.01018	0.01192
GO:0002762	negative regulation of myeloid leukocyte...	38	2	0.16	181	0.01129	0.01323
GO:0000387	spliceosomal snRNP assembly	38	2	0.16	182	0.01129	0.01323
GO:0098760	response to interleukin-7	38	2	0.16	183	0.01129	0.01323
GO:0098761	cellular response to interleukin-7	38	2	0.16	184	0.01129	0.01323
GO:0051169	nuclear transport	325	5	1.38	198	0.0121	0.01687
GO:0016032	viral process	847	14	3.6	28	0.01224	2.4e-05
GO:0035722	interleukin-12-mediated signaling pathwa...	40	2	0.17	188	0.01246	0.01459
GO:0030449	regulation of complement activation	40	2	0.17	189	0.01246	0.01459
GO:0015980	energy derivation by oxidation of organi...	237	6	1.01	61	0.01256	0.00076
GO:0051707	response to other organism	1056	10	4.48	217	0.01265	0.0219
GO:0043207	response to external biotic stimulus	1056	10	4.48	218	0.01265	0.0219
GO:0071349	cellular response to interleukin-12	42	2	0.18	192	0.01368	0.01601
GO:0014009	glial cell proliferation	43	2	0.18	194	0.01431	0.01674
GO:0070671	response to interleukin-12	43	2	0.18	195	0.01431	0.01674
GO:1901028	regulation of mitochondrial outer membra...	44	2	0.19	200	0.01495	0.01749
GO:0009607	response to biotic stimulus	1085	10	4.61	232	0.01508	0.02587
GO:0006120	mitochondrial electron transport NADH t…	46	2	0.2	205	0.01627	0.01902
GO:0006081	cellular aldehyde metabolic process	46	2	0.2	206	0.01627	0.01902
GO:0071398	cellular response to fatty acid	46	2	0.2	207	0.01627	0.01902
GO:0032655	regulation of interleukin-12 production	46	2	0.2	208	0.01627	0.01902
GO:0002931	response to ischemia	47	2	0.2	211	0.01695	0.01981
GO:0032615	interleukin-12 production	47	2	0.2	212	0.01695	0.01981
GO:0019730	antimicrobial humoral response	49	2	0.21	214	0.01834	0.02142
GO:0070661	leukocyte proliferation	244	4	1.04	234	0.01985	0.02603
GO:0002920	regulation of humoral immune response	53	2	0.23	228	0.02126	0.02481
GO:0097345	mitochondrial outer membrane permeabiliz...	54	2	0.23	230	0.02202	0.02569
GO:0045333	cellular respiration	165	5	0.7	69	0.02282	0.00097
GO:1902110	positive regulation of mitochondrial mem...	56	2	0.24	236	0.02356	0.02748
GO:1903902	positive regulation of viral life cycle	56	2	0.24	237	0.02356	0.02748
GO:0051170	import into nucleus	148	3	0.63	245	0.02492	0.03086
GO:1902686	mitochondrial outer membrane permeabiliz...	58	2	0.25	241	0.02516	0.02933
GO:0035690	cellular response to drug	58	2	0.25	242	0.02516	0.02933
GO:0051251	positive regulation of lymphocyte activa...	263	4	1.12	251	0.02531	0.03301
GO:0071345	cellular response to cytokine stimulus	905	10	3.84	152	0.02595	0.00803
GO:1902108	regulation of mitochondrial membrane per...	59	2	0.25	243	0.02597	0.03027
GO:0009060	aerobic respiration	79	4	0.34	54	0.02674	0.00048
GO:0051702	interaction with symbiont	60	2	0.25	246	0.02679	0.03122
GO:0006805	xenobiotic metabolic process	60	2	0.25	247	0.02679	0.03122
GO:0035794	positive regulation of mitochondrial mem...	60	2	0.25	248	0.02679	0.03122
GO:0051099	positive regulation of binding	153	3	0.65	253	0.02715	0.03357
GO:0002274	myeloid leukocyte activation	545	6	2.31	265	0.02749	0.03915
GO:1905710	positive regulation of membrane permeabi...	61	2	0.26	249	0.02763	0.03218
GO:0006911	phagocytosis engulfment	61	2	0.26	250	0.02763	0.03218
GO:0050708	regulation of protein secretion	271	4	1.15	261	0.02785	0.03625
GO:0043312	neutrophil degranulation	406	5	1.72	264	0.02861	0.03898
GO:2000377	regulation of reactive oxygen species me...	157	3	0.67	257	0.02901	0.03583
GO:0042775	mitochondrial ATP synthesis coupled elec...	82	4	0.35	56	0.02918	0.00055
GO:0002283	neutrophil activation involved in immune...	409	5	1.74	267	0.02941	0.04003
GO:0043066	negative regulation of apoptotic process	710	7	3.01	282	0.02994	0.04423
GO:0042773	ATP synthesis coupled electron transport	83	4	0.35	57	0.03002	0.00057
GO:0008284	positive regulation of cell population p...	711	7	3.02	283	0.03014	0.04451
GO:0033273	response to vitamin	65	2	0.28	258	0.03107	0.03615
GO:0006278	RNA-dependent DNA biosynthetic process	65	2	0.28	259	0.03107	0.03615
GO:0071466	cellular response to xenobiotic stimulus	65	2	0.28	260	0.03107	0.03615
GO:0002446	neutrophil mediated immunity	416	5	1.77	276	0.03132	0.04256
GO:0034284	response to monosaccharide	162	3	0.69	263	0.03142	0.03876
GO:0042119	neutrophil activation	418	5	1.77	277	0.03188	0.04329
GO:0043069	negative regulation of programmed cell d...	723	7	3.07	300	0.0326	0.04798
GO:0036230	granulocyte activation	424	5	1.8	292	0.03361	0.04555
GO:0031341	regulation of cell killing	68	2	0.29	266	0.03375	0.03925
GO:0002791	regulation of peptide secretion	289	4	1.23	281	0.03412	0.04419
GO:0006094	gluconeogenesis	69	2	0.29	268	0.03466	0.0403
GO:0009617	response to bacterium	428	5	1.82	299	0.03478	0.0471
GO:0046902	regulation of mitochondrial membrane per...	70	2	0.3	269	0.03559	0.04137
GO:0099024	plasma membrane invagination	70	2	0.3	270	0.03559	0.04137
GO:0002696	positive regulation of leukocyte activat...	295	4	1.25	298	0.03638	0.04704
GO:0070542	response to fatty acid	71	2	0.3	273	0.03652	0.04244
GO:0009410	response to xenobiotic stimulus	71	2	0.3	274	0.03652	0.04244
GO:0042100	B cell proliferation	71	2	0.3	275	0.03652	0.04244
GO:0019319	hexose biosynthetic process	72	2	0.31	278	0.03747	0.04353
GO:0006446	regulation of translational initiation	72	2	0.31	279	0.03747	0.04353
GO:0042493	response to drug	298	4	1.27	302	0.03754	0.0485
GO:0034097	response to cytokine	972	10	4.13	180	0.03791	0.01291
GO:0045638	negative regulation of myeloid cell diff...	73	2	0.31	284	0.03842	0.04463
GO:0002443	leukocyte mediated immunity	658	9	2.79	103	0.03854	0.00304
GO:0002366	leukocyte activation involved in immune ...	592	6	2.51	336	0.03889	0.05464
GO:0033138	positive regulation of peptidyl-serine p...	74	2	0.31	293	0.03938	0.04573
GO:0002263	cell activation involved in immune respo...	596	6	2.53	340	0.03998	0.0561
GO:0006919	activation of cysteine-type endopeptidas...	75	2	0.32	295	0.04035	0.04685
GO:1903312	negative regulation of mRNA metabolic pr...	75	2	0.32	296	0.04035	0.04685
GO:0050867	positive regulation of cell activation	306	4	1.3	318	0.04075	0.05253
GO:0043299	leukocyte degranulation	449	5	1.91	338	0.0414	0.05572
GO:0051709	regulation of killing of cells of other ...	10	1	0.04	285	0.04167	0.04519
GO:1902415	regulation of mRNA binding	10	1	0.04	286	0.04167	0.04519
GO:0030322	stabilization of membrane potential	10	1	0.04	287	0.04167	0.04519
GO:0002674	negative regulation of acute inflammator...	10	1	0.04	288	0.04167	0.04519
GO:2000767	positive regulation of cytoplasmic trans...	10	1	0.04	289	0.04167	0.04519
GO:1990416	cellular response to brain-derived neuro...	10	1	0.04	290	0.04167	0.04519
GO:1902947	regulation of tau-protein kinase activit...	10	1	0.04	291	0.04167	0.04519
GO:0046364	monosaccharide biosynthetic process	77	2	0.33	303	0.04232	0.04911
GO:0009743	response to carbohydrate	183	3	0.78	317	0.04267	0.05235
GO:0042127	regulation of cell population proliferat...	1286	10	5.46	390	0.04274	0.06876
GO:0010324	membrane invagination	78	2	0.33	313	0.04332	0.05026
GO:1903426	regulation of reactive oxygen species bi...	78	2	0.33	314	0.04332	0.05026
GO:0090559	regulation of membrane permeability	78	2	0.33	315	0.04332	0.05026
GO:0001816	cytokine production	611	6	2.59	362	0.04425	0.06183
GO:0032649	regulation of interferon-gamma productio...	79	2	0.34	316	0.04432	0.05141
GO:0002275	myeloid cell activation involved in immu...	458	5	1.94	356	0.04445	0.05968
GO:0044803	multi-organism membrane organization	11	1	0.05	304	0.04574	0.0496
GO:0046607	positive regulation of centrosome cycle	11	1	0.05	305	0.04574	0.0496
GO:0039532	negative regulation of viral-induced cyt...	11	1	0.05	306	0.04574	0.0496
GO:0033483	gas homeostasis	11	1	0.05	307	0.04574	0.0496
GO:0006071	glycerol metabolic process	11	1	0.05	308	0.04574	0.0496
GO:0031936	negative regulation of chromatin silenci...	11	1	0.05	309	0.04574	0.0496
GO:0010918	positive regulation of mitochondrial mem...	11	1	0.05	310	0.04574	0.0496
GO:0002444	myeloid leukocyte mediated immunity	463	5	1.97	363	0.04621	0.06195
GO:2000379	positive regulation of reactive oxygen s...	81	2	0.34	319	0.04636	0.05375
GO:1902106	negative regulation of leukocyte differe...	81	2	0.34	320	0.04636	0.05375
GO:0043279	response to alkaloid	81	2	0.34	321	0.04636	0.05375
GO:0022904	respiratory electron transport chain	101	4	0.43	75	0.04657	0.0012
GO:0006913	nucleocytoplasmic transport	322	4	1.37	360	0.04761	0.06111
GO:0051098	regulation of binding	325	4	1.38	379	0.04896	0.0628
GO:0043903	regulation of symbiotic process	194	3	0.82	357	0.04926	0.06027
GO:0050871	positive regulation of B cell activation	84	2	0.36	342	0.04948	0.05733
GO:0018119	peptidyl-cysteine S-nitrosylation	12	1	0.05	322	0.0498	0.05398
GO:0060213	positive regulation of nuclear-transcrib...	12	1	0.05	323	0.0498	0.05398
GO:0061450	trophoblast cell migration	12	1	0.05	324	0.0498	0.05398
GO:0018202	peptidyl-histidine modification	12	1	0.05	325	0.0498	0.05398
GO:0002834	regulation of response to tumor cell	12	1	0.05	326	0.0498	0.05398
GO:0002837	regulation of immune response to tumor c...	12	1	0.05	327	0.0498	0.05398
GO:0048291	isotype switching to IgG isotypes	12	1	0.05	328	0.0498	0.05398
GO:0017014	protein nitrosylation	12	1	0.05	329	0.0498	0.05398
GO:0043508	negative regulation of JUN kinase activi...	12	1	0.05	330	0.0498	0.05398
GO:0051095	regulation of helicase activity	12	1	0.05	331	0.0498	0.05398
GO:1901163	regulation of trophoblast cell migration	12	1	0.05	332	0.0498	0.05398
GO:1905214	regulation of RNA binding	12	1	0.05	333	0.0498	0.05398
GO:0070071	proton-transporting two-sector ATPase co...	12	1	0.05	334	0.0498	0.05398
GO:2000774	positive regulation of cellular senescen...	12	1	0.05	335	0.0498	0.05398
GO:0000302	response to reactive oxygen species	196	3	0.83	361	0.05051	0.06177
GO:0010720	positive regulation of cell development	477	5	2.03	389	0.05134	0.06857
GO:0060548	negative regulation of cell death	801	7	3.4	413	0.05195	0.0747
GO:0022613	ribonucleoprotein complex biogenesis	418	13	1.77	3	0.05206	4.5e-08
GO:0038096	Fc-gamma receptor signaling pathway invo...	87	2	0.37	358	0.05268	0.06099
GO:0002433	immune response-regulating cell surface ...	87	2	0.37	359	0.05268	0.06099
GO:0032609	interferon-gamma production	88	2	0.37	365	0.05376	0.06223
GO:0071637	regulation of monocyte chemotactic prote...	13	1	0.06	344	0.05384	0.05835
GO:0071605	monocyte chemotactic protein-1 productio...	13	1	0.06	345	0.05384	0.05835
GO:0031126	snoRNA 3'-end processing	13	1	0.06	346	0.05384	0.05835
GO:0007100	mitotic centrosome separation	13	1	0.06	347	0.05384	0.05835
GO:0043651	linoleic acid metabolic process	13	1	0.06	348	0.05384	0.05835
GO:1900037	regulation of cellular response to hypox...	13	1	0.06	349	0.05384	0.05835
GO:0006122	mitochondrial electron transport ubiqui…	13	1	0.06	350	0.05384	0.05835
GO:0006264	mitochondrial DNA replication	13	1	0.06	351	0.05384	0.05835
GO:0032695	negative regulation of interleukin-12 pr...	13	1	0.06	352	0.05384	0.05835
GO:0032682	negative regulation of chemokine product...	13	1	0.06	353	0.05384	0.05835
GO:0035435	phosphate ion transmembrane transport	13	1	0.06	354	0.05384	0.05835
GO:0042255	ribosome assembly	58	5	0.25	17	0.05414	6.7e-06
GO:0006457	protein folding	202	3	0.86	384	0.05436	0.06637
GO:0000398	mRNA splicing via spliceosome	337	4	1.43	393	0.05459	0.06979
GO:0000377	RNA splicing via transesterification re…	337	4	1.43	394	0.05459	0.06979
GO:0038094	Fc-gamma receptor signaling pathway	89	2	0.38	380	0.05485	0.06348
GO:0045069	regulation of viral genome replication	90	2	0.38	381	0.05595	0.06473
GO:0000375	RNA splicing via transesterification re…	340	4	1.44	405	0.05605	0.0716
GO:0006165	nucleoside diphosphate phosphorylation	117	4	0.5	96	0.05695	0.00206
GO:0060252	positive regulation of glial cell prolif...	14	1	0.06	366	0.05786	0.0627
GO:0060211	regulation of nuclear-transcribed mRNA p...	14	1	0.06	367	0.05786	0.0627
GO:0019400	alditol metabolic process	14	1	0.06	368	0.05786	0.0627
GO:0001732	formation of cytoplasmic translation ini...	14	1	0.06	369	0.05786	0.0627
GO:0045838	positive regulation of membrane potentia...	14	1	0.06	370	0.05786	0.0627
GO:0003723	RNA binding	1537	26	6.27	1	5.3e-06	4e-10
GO:0003735	structural constituent of ribosome	149	6	0.61	7	3.1e-05	5e-05
GO:0046933	proton-transporting ATP synthase activit...	17	3	0.07	8	4.2e-05	5.4e-05
GO:0003725	double-stranded RNA binding	70	4	0.29	12	0.00019	0.00026
GO:0090079	translation regulator activity nucleic …	95	8	0.39	2	0.00023	8.5e-09
GO:0008144	drug binding	76	4	0.31	14	0.00026	0.00036
GO:0003743	translation initiation factor activity	46	3	0.19	21	0.00086	0.0011
GO:0003697	single-stranded DNA binding	107	4	0.44	23	0.00094	0.00129
GO:0045296	cadherin binding	304	6	1.24	24	0.00144	0.00223
GO:0019843	rRNA binding	59	3	0.24	26	0.00178	0.00227
GO:0004550	nucleoside diphosphate kinase activity	16	2	0.07	25	0.00189	0.00223
GO:0005525	GTP binding	324	6	1.32	30	0.00199	0.00307
GO:0003746	translation elongation factor activity	17	2	0.07	28	0.00214	0.00252
GO:0043024	ribosomal small subunit binding	17	2	0.07	29	0.00214	0.00252
GO:0034987	immunoglobulin receptor binding	20	2	0.08	31	0.00296	0.0035
GO:0004129	cytochrome-c oxidase activity	21	2	0.09	32	0.00327	0.00385
GO:0005347	ATP transmembrane transporter activity	23	2	0.09	38	0.00392	0.00462
GO:0005504	fatty acid binding	23	2	0.09	39	0.00392	0.00462
GO:0031625	ubiquitin protein ligase binding	283	5	1.15	49	0.00584	0.00832
GO:0097718	disordered domain specific binding	29	2	0.12	46	0.00619	0.00728
GO:0051082	unfolded protein binding	99	3	0.4	51	0.00766	0.00965
GO:0016462	pyrophosphatase activity	735	8	3	61	0.00951	0.01548
GO:0003954	NADH dehydrogenase activity	38	2	0.16	57	0.01046	0.01229
GO:0008137	NADH dehydrogenase (ubiquinone) activity	38	2	0.16	58	0.01046	0.01229
GO:0050136	NADH dehydrogenase (quinone) activity	38	2	0.16	59	0.01046	0.01229
GO:0042277	peptide binding	228	4	0.93	68	0.0139	0.01843
GO:0050661	NADP binding	45	2	0.18	66	0.01447	0.01697
GO:0032550	purine ribonucleoside binding	328	7	1.34	15	0.01487	0.0006
GO:0016853	isomerase activity	133	3	0.54	72	0.01698	0.02121
GO:0051287	NAD binding	50	2	0.2	71	0.01767	0.02071
GO:0016655	oxidoreductase activity acting on NAD(P…	51	2	0.21	73	0.01835	0.02149
GO:0043022	ribosome binding	54	2	0.22	75	0.02043	0.02392
GO:0017111	nucleoside-triphosphatase activity	688	7	2.81	81	0.02122	0.03204
GO:0044877	protein-containing complex binding	1078	11	4.4	45	0.02191	0.00727
GO:0016491	oxidoreductase activity	579	8	2.36	35	0.02199	0.0039
GO:0003823	antigen binding	59	2	0.24	79	0.02412	0.0282
GO:0002039	p53 binding	60	2	0.24	80	0.02488	0.02909
GO:0032549	ribonucleoside binding	331	7	1.35	16	0.02587	0.00063
GO:0001883	purine nucleoside binding	331	7	1.35	17	0.02587	0.00063
GO:0022853	active ion transmembrane transporter act...	160	3	0.65	82	0.02749	0.0341
GO:0003924	GTPase activity	281	4	1.15	84	0.02752	0.03598
GO:0033218	amide binding	289	4	1.18	85	0.03008	0.03925
GO:0019901	protein kinase binding	592	6	2.42	91	0.0329	0.04682
GO:0005200	structural constituent of cytoskeleton	73	2	0.3	87	0.03573	0.04164
GO:0001846	opsonin binding	10	1	0.04	88	0.04007	0.04352
GO:0001094	TFIID-class transcription factor complex...	10	1	0.04	89	0.04007	0.04352
GO:0051880	G-quadruplex DNA binding	10	1	0.04	90	0.04007	0.04352
GO:0003727	single-stranded RNA binding	79	2	0.32	95	0.04125	0.048
GO:0019207	kinase regulator activity	188	3	0.77	96	0.04131	0.05089
GO:0001882	nucleoside binding	336	7	1.37	18	0.04395	0.00069
GO:0042975	peroxisome proliferator activated recept...	11	1	0.04	92	0.04399	0.04776
GO:0008097	5S rRNA binding	11	1	0.04	93	0.04399	0.04776
GO:0001848	complement binding	11	1	0.04	94	0.04399	0.04776
GO:0097617	annealing activity	12	1	0.05	97	0.04789	0.05199
GO:0043295	glutathione binding	12	1	0.05	98	0.04789	0.05199
GO:0034185	apolipoprotein binding	13	1	0.05	99	0.05178	0.0562
GO:0003906	DNA-(apurinic or apyrimidinic site) endo...	13	1	0.05	100	0.05178	0.0562
GO:1900750	oligopeptide binding	13	1	0.05	101	0.05178	0.0562
GO:0016651	oxidoreductase activity acting on NAD(P…	90	2	0.37	104	0.05212	0.06051
GO:0016616	oxidoreductase activity acting on the C…	91	2	0.37	106	0.05316	0.06169
GO:0032561	guanyl ribonucleotide binding	339	7	1.38	19	0.05464	0.00073
GO:0019001	guanyl nucleotide binding	339	7	1.38	20	0.05464	0.00073
GO:0019900	kinase binding	671	6	2.74	121	0.05482	0.07628
GO:0019899	enzyme binding	2003	16	8.17	56	0.05541	0.0122
GO:0016018	cyclosporin A binding	14	1	0.06	102	0.05565	0.0604
GO:0046965	retinoid X receptor binding	14	1	0.06	103	0.05565	0.0604
GO:0070402	NADPH binding	15	1	0.06	107	0.05951	0.06457
GO:0005521	lamin binding	15	1	0.06	108	0.05951	0.06457
GO:0005540	hyaluronic acid binding	15	1	0.06	109	0.05951	0.06457
GO:0015295	solute:proton symporter activity	15	1	0.06	110	0.05951	0.06457
GO:0016614	oxidoreductase activity acting on CH-OH…	98	2	0.4	114	0.0606	0.07023
GO:0047485	protein N-terminus binding	100	2	0.41	115	0.06279	0.07273
GO:0005092	GDP-dissociation inhibitor activity	16	1	0.07	111	0.06335	0.06872
GO:0004602	glutathione peroxidase activity	16	1	0.07	112	0.06335	0.06872
GO:0023026	MHC class II protein complex binding	16	1	0.07	113	0.06335	0.06872
GO:0016769	transferase activity transferring nitro…	17	1	0.07	116	0.06718	0.07286
GO:0008656	cysteine-type endopeptidase activator ac...	17	1	0.07	117	0.06718	0.07286
GO:0001091	RNA polymerase II general transcription ...	17	1	0.07	118	0.06718	0.07286
GO:0140323	solute:anion antiporter activity	17	1	0.07	119	0.06718	0.07286
GO:0015301	anion:anion antiporter activity	17	1	0.07	120	0.06718	0.07286
GO:0043021	ribonucleoprotein complex binding	127	4	0.52	27	0.06982	0.00242
GO:0004364	glutathione transferase activity	18	1	0.07	122	0.07099	0.07698
GO:0001530	lipopolysaccharide binding	19	1	0.08	124	0.07478	0.08108
GO:0044769	ATPase activity coupled to transmembran…	19	1	0.08	125	0.07478	0.08108
GO:0046961	proton-transporting ATPase activity rot…	19	1	0.08	126	0.07478	0.08108
GO:0070182	DNA polymerase binding	19	1	0.08	127	0.07478	0.08108
GO:0042288	MHC class I protein binding	19	1	0.08	128	0.07478	0.08108
GO:0008327	methyl-CpG binding	20	1	0.08	131	0.07856	0.08517
GO:0016505	peptidase activator activity involved in...	20	1	0.08	132	0.07856	0.08517
GO:0031690	adrenergic receptor binding	20	1	0.08	133	0.07856	0.08517
GO:0022804	active transmembrane transporter activit...	247	3	1.01	139	0.0797	0.09676
GO:0071813	lipoprotein particle binding	21	1	0.09	134	0.08233	0.08923
GO:0071814	protein-lipid complex binding	21	1	0.09	135	0.08233	0.08923
GO:0031406	carboxylic acid binding	147	4	0.6	36	0.08588	0.00409
GO:0042974	retinoic acid receptor binding	22	1	0.09	136	0.08608	0.09328
GO:0008143	poly(A) binding	22	1	0.09	137	0.08608	0.09328
GO:0003688	DNA replication origin binding	22	1	0.09	138	0.08608	0.09328
GO:0050997	quaternary ammonium group binding	23	1	0.09	140	0.08981	0.09731
GO:0031210	phosphatidylcholine binding	23	1	0.09	141	0.08981	0.09731
GO:0008649	rRNA methyltransferase activity	23	1	0.09	142	0.08981	0.09731
GO:0140102	catalytic activity acting on a rRNA	23	1	0.09	143	0.08981	0.09731
GO:0044183	protein folding chaperone	24	1	0.1	145	0.09353	0.10132
GO:0003729	mRNA binding	269	3	1.1	154	0.09692	0.11706
GO:0008266	poly(U) RNA binding	25	1	0.1	148	0.09724	0.10532
GO:0023023	MHC protein complex binding	25	1	0.1	149	0.09724	0.10532
GO:0043177	organic acid binding	158	4	0.64	40	0.09915	0.00528
GO:0016620	oxidoreductase activity acting on the a…	26	1	0.11	150	0.10093	0.1093
GO:0008157	protein phosphatase 1 binding	26	1	0.11	151	0.10093	0.1093
GO:0009678	pyrophosphate hydrolysis-driven proton t...	26	1	0.11	152	0.10093	0.1093
GO:0061134	peptidase regulator activity	132	2	0.54	153	0.10111	0.11629
GO:0042802	identical protein binding	1587	10	6.47	176	0.1069	0.16092
GO:0070717	poly-purine tract binding	28	1	0.11	155	0.10826	0.1172
GO:0043015	gamma-tubulin binding	28	1	0.11	156	0.10826	0.1172
GO:0008187	poly-pyrimidine tract binding	28	1	0.11	157	0.10826	0.1172
GO:0017046	peptide hormone binding	29	1	0.12	158	0.11191	0.12112
GO:0003755	peptidyl-prolyl cis-trans isomerase acti...	31	1	0.13	159	0.11915	0.12892
GO:0005539	glycosaminoglycan binding	146	2	0.6	166	0.11949	0.13701
GO:0043539	protein serine/threonine kinase activato...	32	1	0.13	161	0.12275	0.1328
GO:0016903	oxidoreductase activity acting on the a…	32	1	0.13	162	0.12275	0.1328
GO:0042287	MHC protein binding	32	1	0.13	163	0.12275	0.1328
GO:0000217	DNA secondary structure binding	32	1	0.13	164	0.12275	0.1328
GO:0030234	enzyme regulator activity	837	6	3.41	180	0.12459	0.16572
GO:0016859	cis-trans isomerase activity	33	1	0.13	165	0.12634	0.13665
GO:0005198	structural molecule activity	485	9	1.98	13	0.12682	0.00027
GO:0008536	Ran GTPase binding	34	1	0.14	167	0.12992	0.1405
GO:0019887	protein kinase regulator activity	161	2	0.66	175	0.14002	0.16004
GO:0043531	ADP binding	37	1	0.15	169	0.14055	0.15192
GO:0004601	peroxidase activity	37	1	0.15	170	0.14055	0.15192
GO:0015291	secondary active transmembrane transport...	163	2	0.67	179	0.14282	0.16316
GO:0043028	cysteine-type endopeptidase regulator ac...	38	1	0.16	171	0.14406	0.15569
GO:0140296	general transcription initiation factor ...	38	1	0.16	172	0.14406	0.15569
GO:0016504	peptidase activator activity	39	1	0.16	174	0.14757	0.15945
GO:0016684	oxidoreductase activity acting on perox…	41	1	0.17	181	0.15453	0.16691
GO:0016860	intramolecular oxidoreductase activity	41	1	0.17	182	0.15453	0.16691
GO:0008022	protein C-terminus binding	179	2	0.73	185	0.16558	0.18852
GO:0048156	tau protein binding	45	1	0.18	183	0.16828	0.18165
GO:0005080	protein kinase C binding	45	1	0.18	184	0.16828	0.18165
GO:0000287	magnesium ion binding	183	2	0.75	188	0.17137	0.19495
GO:0030246	carbohydrate binding	184	2	0.75	189	0.17282	0.19656
GO:0140097	catalytic activity acting on DNA	184	2	0.75	190	0.17282	0.19656
GO:0016765	transferase activity transferring alkyl…	47	1	0.19	186	0.17508	0.18892
GO:0019829	ATPase-coupled cation transmembrane tran...	47	1	0.19	187	0.17508	0.18892
GO:0042625	ATPase-coupled ion transmembrane transpo...	50	1	0.2	191	0.18517	0.1997
GO:0016887	ATPase activity	365	3	1.49	198	0.18644	0.22019
GO:0008134	transcription factor binding	553	4	2.26	199	0.1884	0.22998
GO:0004536	deoxyribonuclease activity	52	1	0.21	192	0.19183	0.20682
GO:0042562	hormone binding	52	1	0.21	193	0.19183	0.20682
GO:0030374	nuclear receptor transcription coactivat...	52	1	0.21	194	0.19183	0.20682
GO:0001098	basal transcription machinery binding	52	1	0.21	195	0.19183	0.20682
GO:0001099	basal RNA polymerase II transcription ma...	52	1	0.21	196	0.19183	0.20682
GO:0005515	protein binding	10921	50	44.56	234	0.19633	0.38504
GO:0000166	nucleotide binding	1834	14	7.48	76	0.19755	0.02778
GO:1901265	nucleoside phosphate binding	1835	14	7.49	77	0.19804	0.0279
GO:0015078	proton transmembrane transporter activit...	98	6	0.4	4	0.20134	4.6e-06
GO:0042054	histone methyltransferase activity	55	1	0.22	197	0.20171	0.21737
GO:0015294	solute:cation symporter activity	60	1	0.24	200	0.21793	0.23465
GO:0016835	carbon-oxygen lyase activity	63	1	0.26	201	0.22751	0.24484
GO:0000049	tRNA binding	63	1	0.26	202	0.22751	0.24484
GO:0016209	antioxidant activity	65	1	0.27	203	0.23383	0.25156
GO:0004722	protein serine/threonine phosphatase act...	66	1	0.27	204	0.23697	0.2549
GO:0019003	GDP binding	66	1	0.27	205	0.23697	0.2549
GO:0030295	protein kinase activator activity	66	1	0.27	206	0.23697	0.2549
GO:0015297	antiporter activity	66	1	0.27	207	0.23697	0.2549
GO:0008173	RNA methyltransferase activity	67	1	0.27	208	0.24009	0.25822
GO:0009055	electron transfer activity	92	3	0.38	48	0.24511	0.0079
GO:0019209	kinase activator activity	72	1	0.29	210	0.25555	0.27461
GO:0072341	modified amino acid binding	73	1	0.3	211	0.2586	0.27785
GO:0005524	ATP binding	1274	7	5.2	223	0.26091	0.33528
GO:0003713	transcription coactivator activity	244	2	1	214	0.26254	0.29499
GO:0051117	ATPase binding	76	1	0.31	212	0.26768	0.28747
GO:0042626	ATPase-coupled transmembrane transporter...	78	1	0.32	213	0.27368	0.29381
GO:0008047	enzyme activator activity	446	3	1.82	219	0.2737	0.31756
GO:0003712	transcription coregulator activity	450	3	1.84	220	0.27816	0.32245
GO:0003730	mRNA 3'-UTR binding	82	1	0.33	216	0.28553	0.30634
GO:0008276	protein methyltransferase activity	82	1	0.33	217	0.28553	0.30634
GO:0036094	small molecule binding	2090	16	8.53	67	0.28591	0.0179
GO:0015399	primary active transmembrane transporter...	84	1	0.34	218	0.29138	0.31252
GO:0032559	adenyl ribonucleotide binding	1325	7	5.41	232	0.29414	0.37324
GO:0030554	adenyl nucleotide binding	1336	7	5.45	233	0.30145	0.38148
GO:0008170	N-methyltransferase activity	89	1	0.36	221	0.30581	0.32773
GO:0016922	nuclear receptor binding	90	1	0.37	222	0.30866	0.33073
GO:0004866	endopeptidase inhibitor activity	92	1	0.38	224	0.31432	0.3367
GO:0030414	peptidase inhibitor activity	93	1	0.38	225	0.31714	0.33966
GO:0051087	chaperone binding	94	1	0.38	226	0.31994	0.34261
GO:0015293	symporter activity	94	1	0.38	227	0.31994	0.34261
GO:0061135	endopeptidase regulator activity	100	1	0.41	228	0.33654	0.36004
GO:0097367	carbohydrate derivative binding	1855	13	7.57	105	0.34601	0.06098
GO:0002020	protease binding	104	1	0.42	230	0.34738	0.37141
GO:0042826	histone deacetylase binding	104	1	0.42	231	0.34738	0.37141
GO:0003682	chromatin binding	512	3	2.09	235	0.34782	0.39804
GO:0004888	transmembrane signaling receptor activit...	530	3	2.16	238	0.36806	0.41967
GO:0044325	ion channel binding	115	1	0.47	236	0.3763	0.40165
GO:0031072	heat shock protein binding	116	1	0.47	237	0.37886	0.40433
GO:0042803	protein homodimerization activity	541	3	2.21	241	0.38039	0.43278
GO:0015631	tubulin binding	330	2	1.35	240	0.39119	0.43242
GO:0035257	nuclear hormone receptor binding	130	1	0.53	242	0.41371	0.4406
GO:0019903	protein phosphatase binding	135	1	0.55	243	0.42569	0.45302
GO:0140030	modification-dependent protein binding	139	1	0.57	244	0.43509	0.46276
GO:1901363	heterocyclic compound binding	4918	36	20.06	10	0.44859	0.00019
GO:0003674	molecular_function	13438	57	54.83	294	0.45334	0.96964

## Sheet: B cell-3
Supplementary Table 2. B cell recluster GO results -- B cell-3
GO.ID	Term	Annotated	Significant	Expected	Rank in Fisher.classic	Fisher.elim	Fisher.classic
GO:0000184	nuclear-transcribed mRNA catabolic proce...	116	7	0.49	11	5.6e-07	9.9e-07
GO:0006413	translational initiation	177	9	0.75	7	5.1e-06	1.1e-07
GO:0042407	cristae formation	33	4	0.14	22	1.1e-05	1.5e-05
GO:0045727	positive regulation of translation	122	6	0.52	25	1.2e-05	2e-05
GO:0006614	SRP-dependent cotranslational protein ta...	94	5	0.4	34	4.8e-05	7.1e-05
GO:0042776	mitochondrial ATP synthesis coupled prot...	22	3	0.09	39	0.00011	0.00014
GO:0050853	B cell receptor signaling pathway	71	4	0.3	47	0.00023	0.00032
GO:0002181	cytoplasmic translation	95	6	0.4	14	0.0004	4.8e-06
GO:0006958	complement activation classical pathway	36	3	0.15	58	0.00047	0.0006
GO:0019083	viral transcription	170	5	0.72	72	0.00076	0.0011
GO:0001731	formation of translation preinitiation c...	10	2	0.04	64	0.00078	0.00092
GO:0006183	GTP biosynthetic process	10	2	0.04	65	0.00078	0.00092
GO:0019042	viral latency	11	2	0.05	73	0.00095	0.00112
GO:0006241	CTP biosynthetic process	13	2	0.06	83	0.00134	0.00158
GO:0022618	ribonucleoprotein complex assembly	181	10	0.77	1	0.00139	9.1e-09
GO:0008637	apoptotic mitochondrial changes	116	4	0.49	94	0.00147	0.002
GO:0006268	DNA unwinding involved in DNA replicatio...	15	2	0.06	97	0.0018	0.00211
GO:0006450	regulation of translational fidelity	17	2	0.07	100	0.00231	0.00272
GO:0006123	mitochondrial electron transport cytoch…	17	2	0.07	101	0.00231	0.00272
GO:0000028	ribosomal small subunit assembly	18	2	0.08	104	0.0026	0.00305
GO:0042113	B cell activation	230	5	0.98	115	0.00287	0.00412
GO:0051131	chaperone-mediated protein complex assem...	20	2	0.08	113	0.00321	0.00377
GO:0061621	canonical glycolysis	23	2	0.1	128	0.00423	0.00498
GO:0044403	symbiotic process	878	15	3.73	20	0.00438	7.8e-06
GO:0006119	oxidative phosphorylation	126	8	0.53	6	0.00483	1.1e-07
GO:0015949	nucleobase-containing small molecule int...	25	2	0.11	136	0.00499	0.00587
GO:0015867	ATP transport	25	2	0.11	137	0.00499	0.00587
GO:0008334	histone mRNA metabolic process	25	2	0.11	138	0.00499	0.00587
GO:0050821	protein stabilization	164	4	0.7	144	0.00514	0.00689
GO:0006910	phagocytosis recognition	26	2	0.11	141	0.00539	0.00634
GO:0042981	regulation of apoptotic process	1246	12	5.29	166	0.0054	0.01061
GO:0000027	ribosomal large subunit assembly	27	2	0.11	142	0.00581	0.00682
GO:0045471	response to ethanol	88	3	0.37	149	0.00617	0.00777
GO:0071353	cellular response to interleukin-4	28	2	0.12	147	0.00624	0.00733
GO:0062125	regulation of mitochondrial gene express...	30	2	0.13	155	0.00714	0.00838
GO:0006626	protein targeting to mitochondrion	95	3	0.4	163	0.00763	0.00957
GO:1902600	proton transmembrane transport	124	6	0.53	27	0.00804	2.2e-05
GO:0006369	termination of RNA polymerase II transcr...	33	2	0.14	165	0.0086	0.01008
GO:0008283	cell population proliferation	1508	13	6.4	203	0.00938	0.01857
GO:0042220	response to cocaine	36	2	0.15	174	0.01018	0.01192
GO:0045070	positive regulation of viral genome repl...	36	2	0.15	175	0.01018	0.01192
GO:0002762	negative regulation of myeloid leukocyte...	38	2	0.16	181	0.01129	0.01323
GO:0000387	spliceosomal snRNP assembly	38	2	0.16	182	0.01129	0.01323
GO:0098760	response to interleukin-7	38	2	0.16	183	0.01129	0.01323
GO:0098761	cellular response to interleukin-7	38	2	0.16	184	0.01129	0.01323
GO:0051169	nuclear transport	325	5	1.38	198	0.0121	0.01687
GO:0016032	viral process	847	14	3.6	28	0.01224	2.4e-05
GO:0035722	interleukin-12-mediated signaling pathwa...	40	2	0.17	188	0.01246	0.01459
GO:0030449	regulation of complement activation	40	2	0.17	189	0.01246	0.01459
GO:0015980	energy derivation by oxidation of organi...	237	6	1.01	61	0.01256	0.00076
GO:0051707	response to other organism	1056	10	4.48	217	0.01265	0.0219
GO:0043207	response to external biotic stimulus	1056	10	4.48	218	0.01265	0.0219
GO:0071349	cellular response to interleukin-12	42	2	0.18	192	0.01368	0.01601
GO:0014009	glial cell proliferation	43	2	0.18	194	0.01431	0.01674
GO:0070671	response to interleukin-12	43	2	0.18	195	0.01431	0.01674
GO:1901028	regulation of mitochondrial outer membra...	44	2	0.19	200	0.01495	0.01749
GO:0009607	response to biotic stimulus	1085	10	4.61	232	0.01508	0.02587
GO:0006120	mitochondrial electron transport NADH t…	46	2	0.2	205	0.01627	0.01902
GO:0006081	cellular aldehyde metabolic process	46	2	0.2	206	0.01627	0.01902
GO:0071398	cellular response to fatty acid	46	2	0.2	207	0.01627	0.01902
GO:0032655	regulation of interleukin-12 production	46	2	0.2	208	0.01627	0.01902
GO:0002931	response to ischemia	47	2	0.2	211	0.01695	0.01981
GO:0032615	interleukin-12 production	47	2	0.2	212	0.01695	0.01981
GO:0019730	antimicrobial humoral response	49	2	0.21	214	0.01834	0.02142
GO:0070661	leukocyte proliferation	244	4	1.04	234	0.01985	0.02603
GO:0002920	regulation of humoral immune response	53	2	0.23	228	0.02126	0.02481
GO:0097345	mitochondrial outer membrane permeabiliz...	54	2	0.23	230	0.02202	0.02569
GO:0045333	cellular respiration	165	5	0.7	69	0.02282	0.00097
GO:1902110	positive regulation of mitochondrial mem...	56	2	0.24	236	0.02356	0.02748
GO:1903902	positive regulation of viral life cycle	56	2	0.24	237	0.02356	0.02748
GO:0051170	import into nucleus	148	3	0.63	245	0.02492	0.03086
GO:1902686	mitochondrial outer membrane permeabiliz...	58	2	0.25	241	0.02516	0.02933
GO:0035690	cellular response to drug	58	2	0.25	242	0.02516	0.02933
GO:0051251	positive regulation of lymphocyte activa...	263	4	1.12	251	0.02531	0.03301
GO:0071345	cellular response to cytokine stimulus	905	10	3.84	152	0.02595	0.00803
GO:1902108	regulation of mitochondrial membrane per...	59	2	0.25	243	0.02597	0.03027
GO:0009060	aerobic respiration	79	4	0.34	54	0.02674	0.00048
GO:0051702	interaction with symbiont	60	2	0.25	246	0.02679	0.03122
GO:0006805	xenobiotic metabolic process	60	2	0.25	247	0.02679	0.03122
GO:0035794	positive regulation of mitochondrial mem...	60	2	0.25	248	0.02679	0.03122
GO:0051099	positive regulation of binding	153	3	0.65	253	0.02715	0.03357
GO:0002274	myeloid leukocyte activation	545	6	2.31	265	0.02749	0.03915
GO:1905710	positive regulation of membrane permeabi...	61	2	0.26	249	0.02763	0.03218
GO:0006911	phagocytosis engulfment	61	2	0.26	250	0.02763	0.03218
GO:0050708	regulation of protein secretion	271	4	1.15	261	0.02785	0.03625
GO:0043312	neutrophil degranulation	406	5	1.72	264	0.02861	0.03898
GO:2000377	regulation of reactive oxygen species me...	157	3	0.67	257	0.02901	0.03583
GO:0042775	mitochondrial ATP synthesis coupled elec...	82	4	0.35	56	0.02918	0.00055
GO:0002283	neutrophil activation involved in immune...	409	5	1.74	267	0.02941	0.04003
GO:0043066	negative regulation of apoptotic process	710	7	3.01	282	0.02994	0.04423
GO:0042773	ATP synthesis coupled electron transport	83	4	0.35	57	0.03002	0.00057
GO:0008284	positive regulation of cell population p...	711	7	3.02	283	0.03014	0.04451
GO:0033273	response to vitamin	65	2	0.28	258	0.03107	0.03615
GO:0006278	RNA-dependent DNA biosynthetic process	65	2	0.28	259	0.03107	0.03615
GO:0071466	cellular response to xenobiotic stimulus	65	2	0.28	260	0.03107	0.03615
GO:0002446	neutrophil mediated immunity	416	5	1.77	276	0.03132	0.04256
GO:0034284	response to monosaccharide	162	3	0.69	263	0.03142	0.03876
GO:0042119	neutrophil activation	418	5	1.77	277	0.03188	0.04329
GO:0043069	negative regulation of programmed cell d...	723	7	3.07	300	0.0326	0.04798
GO:0036230	granulocyte activation	424	5	1.8	292	0.03361	0.04555
GO:0031341	regulation of cell killing	68	2	0.29	266	0.03375	0.03925
GO:0002791	regulation of peptide secretion	289	4	1.23	281	0.03412	0.04419
GO:0006094	gluconeogenesis	69	2	0.29	268	0.03466	0.0403
GO:0009617	response to bacterium	428	5	1.82	299	0.03478	0.0471
GO:0046902	regulation of mitochondrial membrane per...	70	2	0.3	269	0.03559	0.04137
GO:0099024	plasma membrane invagination	70	2	0.3	270	0.03559	0.04137
GO:0002696	positive regulation of leukocyte activat...	295	4	1.25	298	0.03638	0.04704
GO:0070542	response to fatty acid	71	2	0.3	273	0.03652	0.04244
GO:0009410	response to xenobiotic stimulus	71	2	0.3	274	0.03652	0.04244
GO:0042100	B cell proliferation	71	2	0.3	275	0.03652	0.04244
GO:0019319	hexose biosynthetic process	72	2	0.31	278	0.03747	0.04353
GO:0006446	regulation of translational initiation	72	2	0.31	279	0.03747	0.04353
GO:0042493	response to drug	298	4	1.27	302	0.03754	0.0485
GO:0034097	response to cytokine	972	10	4.13	180	0.03791	0.01291
GO:0045638	negative regulation of myeloid cell diff...	73	2	0.31	284	0.03842	0.04463
GO:0002443	leukocyte mediated immunity	658	9	2.79	103	0.03854	0.00304
GO:0002366	leukocyte activation involved in immune ...	592	6	2.51	336	0.03889	0.05464
GO:0033138	positive regulation of peptidyl-serine p...	74	2	0.31	293	0.03938	0.04573
GO:0002263	cell activation involved in immune respo...	596	6	2.53	340	0.03998	0.0561
GO:0006919	activation of cysteine-type endopeptidas...	75	2	0.32	295	0.04035	0.04685
GO:1903312	negative regulation of mRNA metabolic pr...	75	2	0.32	296	0.04035	0.04685
GO:0050867	positive regulation of cell activation	306	4	1.3	318	0.04075	0.05253
GO:0043299	leukocyte degranulation	449	5	1.91	338	0.0414	0.05572
GO:0051709	regulation of killing of cells of other ...	10	1	0.04	285	0.04167	0.04519
GO:1902415	regulation of mRNA binding	10	1	0.04	286	0.04167	0.04519
GO:0030322	stabilization of membrane potential	10	1	0.04	287	0.04167	0.04519
GO:0002674	negative regulation of acute inflammator...	10	1	0.04	288	0.04167	0.04519
GO:2000767	positive regulation of cytoplasmic trans...	10	1	0.04	289	0.04167	0.04519
GO:1990416	cellular response to brain-derived neuro...	10	1	0.04	290	0.04167	0.04519
GO:1902947	regulation of tau-protein kinase activit...	10	1	0.04	291	0.04167	0.04519
GO:0046364	monosaccharide biosynthetic process	77	2	0.33	303	0.04232	0.04911
GO:0009743	response to carbohydrate	183	3	0.78	317	0.04267	0.05235
GO:0042127	regulation of cell population proliferat...	1286	10	5.46	390	0.04274	0.06876
GO:0010324	membrane invagination	78	2	0.33	313	0.04332	0.05026
GO:1903426	regulation of reactive oxygen species bi...	78	2	0.33	314	0.04332	0.05026
GO:0090559	regulation of membrane permeability	78	2	0.33	315	0.04332	0.05026
GO:0001816	cytokine production	611	6	2.59	362	0.04425	0.06183
GO:0032649	regulation of interferon-gamma productio...	79	2	0.34	316	0.04432	0.05141
GO:0002275	myeloid cell activation involved in immu...	458	5	1.94	356	0.04445	0.05968
GO:0044803	multi-organism membrane organization	11	1	0.05	304	0.04574	0.0496
GO:0046607	positive regulation of centrosome cycle	11	1	0.05	305	0.04574	0.0496
GO:0039532	negative regulation of viral-induced cyt...	11	1	0.05	306	0.04574	0.0496
GO:0033483	gas homeostasis	11	1	0.05	307	0.04574	0.0496
GO:0006071	glycerol metabolic process	11	1	0.05	308	0.04574	0.0496
GO:0031936	negative regulation of chromatin silenci...	11	1	0.05	309	0.04574	0.0496
GO:0010918	positive regulation of mitochondrial mem...	11	1	0.05	310	0.04574	0.0496
GO:0002444	myeloid leukocyte mediated immunity	463	5	1.97	363	0.04621	0.06195
GO:2000379	positive regulation of reactive oxygen s...	81	2	0.34	319	0.04636	0.05375
GO:1902106	negative regulation of leukocyte differe...	81	2	0.34	320	0.04636	0.05375
GO:0043279	response to alkaloid	81	2	0.34	321	0.04636	0.05375
GO:0022904	respiratory electron transport chain	101	4	0.43	75	0.04657	0.0012
GO:0006913	nucleocytoplasmic transport	322	4	1.37	360	0.04761	0.06111
GO:0051098	regulation of binding	325	4	1.38	379	0.04896	0.0628
GO:0043903	regulation of symbiotic process	194	3	0.82	357	0.04926	0.06027
GO:0050871	positive regulation of B cell activation	84	2	0.36	342	0.04948	0.05733
GO:0018119	peptidyl-cysteine S-nitrosylation	12	1	0.05	322	0.0498	0.05398
GO:0060213	positive regulation of nuclear-transcrib...	12	1	0.05	323	0.0498	0.05398
GO:0061450	trophoblast cell migration	12	1	0.05	324	0.0498	0.05398
GO:0018202	peptidyl-histidine modification	12	1	0.05	325	0.0498	0.05398
GO:0002834	regulation of response to tumor cell	12	1	0.05	326	0.0498	0.05398
GO:0002837	regulation of immune response to tumor c...	12	1	0.05	327	0.0498	0.05398
GO:0048291	isotype switching to IgG isotypes	12	1	0.05	328	0.0498	0.05398
GO:0017014	protein nitrosylation	12	1	0.05	329	0.0498	0.05398
GO:0043508	negative regulation of JUN kinase activi...	12	1	0.05	330	0.0498	0.05398
GO:0051095	regulation of helicase activity	12	1	0.05	331	0.0498	0.05398
GO:1901163	regulation of trophoblast cell migration	12	1	0.05	332	0.0498	0.05398
GO:1905214	regulation of RNA binding	12	1	0.05	333	0.0498	0.05398
GO:0070071	proton-transporting two-sector ATPase co...	12	1	0.05	334	0.0498	0.05398
GO:2000774	positive regulation of cellular senescen...	12	1	0.05	335	0.0498	0.05398
GO:0000302	response to reactive oxygen species	196	3	0.83	361	0.05051	0.06177
GO:0010720	positive regulation of cell development	477	5	2.03	389	0.05134	0.06857
GO:0060548	negative regulation of cell death	801	7	3.4	413	0.05195	0.0747
GO:0022613	ribonucleoprotein complex biogenesis	418	13	1.77	3	0.05206	4.5e-08
GO:0038096	Fc-gamma receptor signaling pathway invo...	87	2	0.37	358	0.05268	0.06099
GO:0002433	immune response-regulating cell surface ...	87	2	0.37	359	0.05268	0.06099
GO:0032609	interferon-gamma production	88	2	0.37	365	0.05376	0.06223
GO:0071637	regulation of monocyte chemotactic prote...	13	1	0.06	344	0.05384	0.05835
GO:0071605	monocyte chemotactic protein-1 productio...	13	1	0.06	345	0.05384	0.05835
GO:0031126	snoRNA 3'-end processing	13	1	0.06	346	0.05384	0.05835
GO:0007100	mitotic centrosome separation	13	1	0.06	347	0.05384	0.05835
GO:0043651	linoleic acid metabolic process	13	1	0.06	348	0.05384	0.05835
GO:1900037	regulation of cellular response to hypox...	13	1	0.06	349	0.05384	0.05835
GO:0006122	mitochondrial electron transport ubiqui…	13	1	0.06	350	0.05384	0.05835
GO:0006264	mitochondrial DNA replication	13	1	0.06	351	0.05384	0.05835
GO:0032695	negative regulation of interleukin-12 pr...	13	1	0.06	352	0.05384	0.05835
GO:0032682	negative regulation of chemokine product...	13	1	0.06	353	0.05384	0.05835
GO:0035435	phosphate ion transmembrane transport	13	1	0.06	354	0.05384	0.05835
GO:0042255	ribosome assembly	58	5	0.25	17	0.05414	6.7e-06
GO:0006457	protein folding	202	3	0.86	384	0.05436	0.06637
GO:0000398	mRNA splicing via spliceosome	337	4	1.43	393	0.05459	0.06979
GO:0000377	RNA splicing via transesterification re…	337	4	1.43	394	0.05459	0.06979
GO:0038094	Fc-gamma receptor signaling pathway	89	2	0.38	380	0.05485	0.06348
GO:0045069	regulation of viral genome replication	90	2	0.38	381	0.05595	0.06473
GO:0000375	RNA splicing via transesterification re…	340	4	1.44	405	0.05605	0.0716
GO:0006165	nucleoside diphosphate phosphorylation	117	4	0.5	96	0.05695	0.00206
GO:0060252	positive regulation of glial cell prolif...	14	1	0.06	366	0.05786	0.0627
GO:0060211	regulation of nuclear-transcribed mRNA p...	14	1	0.06	367	0.05786	0.0627
GO:0019400	alditol metabolic process	14	1	0.06	368	0.05786	0.0627
GO:0001732	formation of cytoplasmic translation ini...	14	1	0.06	369	0.05786	0.0627
GO:0045838	positive regulation of membrane potentia...	14	1	0.06	370	0.05786	0.0627
GO:0003723	RNA binding	1537	26	6.27	1	5.3e-06	4e-10
GO:0003735	structural constituent of ribosome	149	6	0.61	7	3.1e-05	5e-05
GO:0046933	proton-transporting ATP synthase activit...	17	3	0.07	8	4.2e-05	5.4e-05
GO:0003725	double-stranded RNA binding	70	4	0.29	12	0.00019	0.00026
GO:0090079	translation regulator activity nucleic …	95	8	0.39	2	0.00023	8.5e-09
GO:0008144	drug binding	76	4	0.31	14	0.00026	0.00036
GO:0003743	translation initiation factor activity	46	3	0.19	21	0.00086	0.0011
GO:0003697	single-stranded DNA binding	107	4	0.44	23	0.00094	0.00129
GO:0045296	cadherin binding	304	6	1.24	24	0.00144	0.00223
GO:0019843	rRNA binding	59	3	0.24	26	0.00178	0.00227
GO:0004550	nucleoside diphosphate kinase activity	16	2	0.07	25	0.00189	0.00223
GO:0005525	GTP binding	324	6	1.32	30	0.00199	0.00307
GO:0003746	translation elongation factor activity	17	2	0.07	28	0.00214	0.00252
GO:0043024	ribosomal small subunit binding	17	2	0.07	29	0.00214	0.00252
GO:0034987	immunoglobulin receptor binding	20	2	0.08	31	0.00296	0.0035
GO:0004129	cytochrome-c oxidase activity	21	2	0.09	32	0.00327	0.00385
GO:0005347	ATP transmembrane transporter activity	23	2	0.09	38	0.00392	0.00462
GO:0005504	fatty acid binding	23	2	0.09	39	0.00392	0.00462
GO:0031625	ubiquitin protein ligase binding	283	5	1.15	49	0.00584	0.00832
GO:0097718	disordered domain specific binding	29	2	0.12	46	0.00619	0.00728
GO:0051082	unfolded protein binding	99	3	0.4	51	0.00766	0.00965
GO:0016462	pyrophosphatase activity	735	8	3	61	0.00951	0.01548
GO:0003954	NADH dehydrogenase activity	38	2	0.16	57	0.01046	0.01229
GO:0008137	NADH dehydrogenase (ubiquinone) activity	38	2	0.16	58	0.01046	0.01229
GO:0050136	NADH dehydrogenase (quinone) activity	38	2	0.16	59	0.01046	0.01229
GO:0042277	peptide binding	228	4	0.93	68	0.0139	0.01843
GO:0050661	NADP binding	45	2	0.18	66	0.01447	0.01697
GO:0032550	purine ribonucleoside binding	328	7	1.34	15	0.01487	0.0006
GO:0016853	isomerase activity	133	3	0.54	72	0.01698	0.02121
GO:0051287	NAD binding	50	2	0.2	71	0.01767	0.02071
GO:0016655	oxidoreductase activity acting on NAD(P…	51	2	0.21	73	0.01835	0.02149
GO:0043022	ribosome binding	54	2	0.22	75	0.02043	0.02392
GO:0017111	nucleoside-triphosphatase activity	688	7	2.81	81	0.02122	0.03204
GO:0044877	protein-containing complex binding	1078	11	4.4	45	0.02191	0.00727
GO:0016491	oxidoreductase activity	579	8	2.36	35	0.02199	0.0039
GO:0003823	antigen binding	59	2	0.24	79	0.02412	0.0282
GO:0002039	p53 binding	60	2	0.24	80	0.02488	0.02909
GO:0032549	ribonucleoside binding	331	7	1.35	16	0.02587	0.00063
GO:0001883	purine nucleoside binding	331	7	1.35	17	0.02587	0.00063
GO:0022853	active ion transmembrane transporter act...	160	3	0.65	82	0.02749	0.0341
GO:0003924	GTPase activity	281	4	1.15	84	0.02752	0.03598
GO:0033218	amide binding	289	4	1.18	85	0.03008	0.03925
GO:0019901	protein kinase binding	592	6	2.42	91	0.0329	0.04682
GO:0005200	structural constituent of cytoskeleton	73	2	0.3	87	0.03573	0.04164
GO:0001846	opsonin binding	10	1	0.04	88	0.04007	0.04352
GO:0001094	TFIID-class transcription factor complex...	10	1	0.04	89	0.04007	0.04352
GO:0051880	G-quadruplex DNA binding	10	1	0.04	90	0.04007	0.04352
GO:0003727	single-stranded RNA binding	79	2	0.32	95	0.04125	0.048
GO:0019207	kinase regulator activity	188	3	0.77	96	0.04131	0.05089
GO:0001882	nucleoside binding	336	7	1.37	18	0.04395	0.00069
GO:0042975	peroxisome proliferator activated recept...	11	1	0.04	92	0.04399	0.04776
GO:0008097	5S rRNA binding	11	1	0.04	93	0.04399	0.04776
GO:0001848	complement binding	11	1	0.04	94	0.04399	0.04776
GO:0097617	annealing activity	12	1	0.05	97	0.04789	0.05199
GO:0043295	glutathione binding	12	1	0.05	98	0.04789	0.05199
GO:0034185	apolipoprotein binding	13	1	0.05	99	0.05178	0.0562
GO:0003906	DNA-(apurinic or apyrimidinic site) endo...	13	1	0.05	100	0.05178	0.0562
GO:1900750	oligopeptide binding	13	1	0.05	101	0.05178	0.0562
GO:0016651	oxidoreductase activity acting on NAD(P…	90	2	0.37	104	0.05212	0.06051
GO:0016616	oxidoreductase activity acting on the C…	91	2	0.37	106	0.05316	0.06169
GO:0032561	guanyl ribonucleotide binding	339	7	1.38	19	0.05464	0.00073
GO:0019001	guanyl nucleotide binding	339	7	1.38	20	0.05464	0.00073
GO:0019900	kinase binding	671	6	2.74	121	0.05482	0.07628
GO:0019899	enzyme binding	2003	16	8.17	56	0.05541	0.0122
GO:0016018	cyclosporin A binding	14	1	0.06	102	0.05565	0.0604
GO:0046965	retinoid X receptor binding	14	1	0.06	103	0.05565	0.0604
GO:0070402	NADPH binding	15	1	0.06	107	0.05951	0.06457
GO:0005521	lamin binding	15	1	0.06	108	0.05951	0.06457
GO:0005540	hyaluronic acid binding	15	1	0.06	109	0.05951	0.06457
GO:0015295	solute:proton symporter activity	15	1	0.06	110	0.05951	0.06457
GO:0016614	oxidoreductase activity acting on CH-OH…	98	2	0.4	114	0.0606	0.07023
GO:0047485	protein N-terminus binding	100	2	0.41	115	0.06279	0.07273
GO:0005092	GDP-dissociation inhibitor activity	16	1	0.07	111	0.06335	0.06872
GO:0004602	glutathione peroxidase activity	16	1	0.07	112	0.06335	0.06872
GO:0023026	MHC class II protein complex binding	16	1	0.07	113	0.06335	0.06872
GO:0016769	transferase activity transferring nitro…	17	1	0.07	116	0.06718	0.07286
GO:0008656	cysteine-type endopeptidase activator ac...	17	1	0.07	117	0.06718	0.07286
GO:0001091	RNA polymerase II general transcription ...	17	1	0.07	118	0.06718	0.07286
GO:0140323	solute:anion antiporter activity	17	1	0.07	119	0.06718	0.07286
GO:0015301	anion:anion antiporter activity	17	1	0.07	120	0.06718	0.07286
GO:0043021	ribonucleoprotein complex binding	127	4	0.52	27	0.06982	0.00242
GO:0004364	glutathione transferase activity	18	1	0.07	122	0.07099	0.07698
GO:0001530	lipopolysaccharide binding	19	1	0.08	124	0.07478	0.08108
GO:0044769	ATPase activity coupled to transmembran…	19	1	0.08	125	0.07478	0.08108
GO:0046961	proton-transporting ATPase activity rot…	19	1	0.08	126	0.07478	0.08108
GO:0070182	DNA polymerase binding	19	1	0.08	127	0.07478	0.08108
GO:0042288	MHC class I protein binding	19	1	0.08	128	0.07478	0.08108
GO:0008327	methyl-CpG binding	20	1	0.08	131	0.07856	0.08517
GO:0016505	peptidase activator activity involved in...	20	1	0.08	132	0.07856	0.08517
GO:0031690	adrenergic receptor binding	20	1	0.08	133	0.07856	0.08517
GO:0022804	active transmembrane transporter activit...	247	3	1.01	139	0.0797	0.09676
GO:0071813	lipoprotein particle binding	21	1	0.09	134	0.08233	0.08923
GO:0071814	protein-lipid complex binding	21	1	0.09	135	0.08233	0.08923
GO:0031406	carboxylic acid binding	147	4	0.6	36	0.08588	0.00409
GO:0042974	retinoic acid receptor binding	22	1	0.09	136	0.08608	0.09328
GO:0008143	poly(A) binding	22	1	0.09	137	0.08608	0.09328
GO:0003688	DNA replication origin binding	22	1	0.09	138	0.08608	0.09328
GO:0050997	quaternary ammonium group binding	23	1	0.09	140	0.08981	0.09731
GO:0031210	phosphatidylcholine binding	23	1	0.09	141	0.08981	0.09731
GO:0008649	rRNA methyltransferase activity	23	1	0.09	142	0.08981	0.09731
GO:0140102	catalytic activity acting on a rRNA	23	1	0.09	143	0.08981	0.09731
GO:0044183	protein folding chaperone	24	1	0.1	145	0.09353	0.10132
GO:0003729	mRNA binding	269	3	1.1	154	0.09692	0.11706
GO:0008266	poly(U) RNA binding	25	1	0.1	148	0.09724	0.10532
GO:0023023	MHC protein complex binding	25	1	0.1	149	0.09724	0.10532
GO:0043177	organic acid binding	158	4	0.64	40	0.09915	0.00528
GO:0016620	oxidoreductase activity acting on the a…	26	1	0.11	150	0.10093	0.1093
GO:0008157	protein phosphatase 1 binding	26	1	0.11	151	0.10093	0.1093
GO:0009678	pyrophosphate hydrolysis-driven proton t...	26	1	0.11	152	0.10093	0.1093
GO:0061134	peptidase regulator activity	132	2	0.54	153	0.10111	0.11629
GO:0042802	identical protein binding	1587	10	6.47	176	0.1069	0.16092
GO:0070717	poly-purine tract binding	28	1	0.11	155	0.10826	0.1172
GO:0043015	gamma-tubulin binding	28	1	0.11	156	0.10826	0.1172
GO:0008187	poly-pyrimidine tract binding	28	1	0.11	157	0.10826	0.1172
GO:0017046	peptide hormone binding	29	1	0.12	158	0.11191	0.12112
GO:0003755	peptidyl-prolyl cis-trans isomerase acti...	31	1	0.13	159	0.11915	0.12892
GO:0005539	glycosaminoglycan binding	146	2	0.6	166	0.11949	0.13701
GO:0043539	protein serine/threonine kinase activato...	32	1	0.13	161	0.12275	0.1328
GO:0016903	oxidoreductase activity acting on the a…	32	1	0.13	162	0.12275	0.1328
GO:0042287	MHC protein binding	32	1	0.13	163	0.12275	0.1328
GO:0000217	DNA secondary structure binding	32	1	0.13	164	0.12275	0.1328
GO:0030234	enzyme regulator activity	837	6	3.41	180	0.12459	0.16572
GO:0016859	cis-trans isomerase activity	33	1	0.13	165	0.12634	0.13665
GO:0005198	structural molecule activity	485	9	1.98	13	0.12682	0.00027
GO:0008536	Ran GTPase binding	34	1	0.14	167	0.12992	0.1405
GO:0019887	protein kinase regulator activity	161	2	0.66	175	0.14002	0.16004
GO:0043531	ADP binding	37	1	0.15	169	0.14055	0.15192
GO:0004601	peroxidase activity	37	1	0.15	170	0.14055	0.15192
GO:0015291	secondary active transmembrane transport...	163	2	0.67	179	0.14282	0.16316
GO:0043028	cysteine-type endopeptidase regulator ac...	38	1	0.16	171	0.14406	0.15569
GO:0140296	general transcription initiation factor ...	38	1	0.16	172	0.14406	0.15569
GO:0016504	peptidase activator activity	39	1	0.16	174	0.14757	0.15945
GO:0016684	oxidoreductase activity acting on perox…	41	1	0.17	181	0.15453	0.16691
GO:0016860	intramolecular oxidoreductase activity	41	1	0.17	182	0.15453	0.16691
GO:0008022	protein C-terminus binding	179	2	0.73	185	0.16558	0.18852
GO:0048156	tau protein binding	45	1	0.18	183	0.16828	0.18165
GO:0005080	protein kinase C binding	45	1	0.18	184	0.16828	0.18165
GO:0000287	magnesium ion binding	183	2	0.75	188	0.17137	0.19495
GO:0030246	carbohydrate binding	184	2	0.75	189	0.17282	0.19656
GO:0140097	catalytic activity acting on DNA	184	2	0.75	190	0.17282	0.19656
GO:0016765	transferase activity transferring alkyl…	47	1	0.19	186	0.17508	0.18892
GO:0019829	ATPase-coupled cation transmembrane tran...	47	1	0.19	187	0.17508	0.18892
GO:0042625	ATPase-coupled ion transmembrane transpo...	50	1	0.2	191	0.18517	0.1997
GO:0016887	ATPase activity	365	3	1.49	198	0.18644	0.22019
GO:0008134	transcription factor binding	553	4	2.26	199	0.1884	0.22998
GO:0004536	deoxyribonuclease activity	52	1	0.21	192	0.19183	0.20682
GO:0042562	hormone binding	52	1	0.21	193	0.19183	0.20682
GO:0030374	nuclear receptor transcription coactivat...	52	1	0.21	194	0.19183	0.20682
GO:0001098	basal transcription machinery binding	52	1	0.21	195	0.19183	0.20682
GO:0001099	basal RNA polymerase II transcription ma...	52	1	0.21	196	0.19183	0.20682
GO:0005515	protein binding	10921	50	44.56	234	0.19633	0.38504
GO:0000166	nucleotide binding	1834	14	7.48	76	0.19755	0.02778
GO:1901265	nucleoside phosphate binding	1835	14	7.49	77	0.19804	0.0279
GO:0015078	proton transmembrane transporter activit...	98	6	0.4	4	0.20134	4.6e-06
GO:0042054	histone methyltransferase activity	55	1	0.22	197	0.20171	0.21737
GO:0015294	solute:cation symporter activity	60	1	0.24	200	0.21793	0.23465
GO:0016835	carbon-oxygen lyase activity	63	1	0.26	201	0.22751	0.24484
GO:0000049	tRNA binding	63	1	0.26	202	0.22751	0.24484
GO:0016209	antioxidant activity	65	1	0.27	203	0.23383	0.25156
GO:0004722	protein serine/threonine phosphatase act...	66	1	0.27	204	0.23697	0.2549
GO:0019003	GDP binding	66	1	0.27	205	0.23697	0.2549
GO:0030295	protein kinase activator activity	66	1	0.27	206	0.23697	0.2549
GO:0015297	antiporter activity	66	1	0.27	207	0.23697	0.2549
GO:0008173	RNA methyltransferase activity	67	1	0.27	208	0.24009	0.25822
GO:0009055	electron transfer activity	92	3	0.38	48	0.24511	0.0079
GO:0019209	kinase activator activity	72	1	0.29	210	0.25555	0.27461
GO:0072341	modified amino acid binding	73	1	0.3	211	0.2586	0.27785
GO:0005524	ATP binding	1274	7	5.2	223	0.26091	0.33528
GO:0003713	transcription coactivator activity	244	2	1	214	0.26254	0.29499
GO:0051117	ATPase binding	76	1	0.31	212	0.26768	0.28747
GO:0042626	ATPase-coupled transmembrane transporter...	78	1	0.32	213	0.27368	0.29381
GO:0008047	enzyme activator activity	446	3	1.82	219	0.2737	0.31756
GO:0003712	transcription coregulator activity	450	3	1.84	220	0.27816	0.32245
GO:0003730	mRNA 3'-UTR binding	82	1	0.33	216	0.28553	0.30634
GO:0008276	protein methyltransferase activity	82	1	0.33	217	0.28553	0.30634
GO:0036094	small molecule binding	2090	16	8.53	67	0.28591	0.0179
GO:0015399	primary active transmembrane transporter...	84	1	0.34	218	0.29138	0.31252
GO:0032559	adenyl ribonucleotide binding	1325	7	5.41	232	0.29414	0.37324
GO:0030554	adenyl nucleotide binding	1336	7	5.45	233	0.30145	0.38148
GO:0008170	N-methyltransferase activity	89	1	0.36	221	0.30581	0.32773
GO:0016922	nuclear receptor binding	90	1	0.37	222	0.30866	0.33073
GO:0004866	endopeptidase inhibitor activity	92	1	0.38	224	0.31432	0.3367
GO:0030414	peptidase inhibitor activity	93	1	0.38	225	0.31714	0.33966
GO:0051087	chaperone binding	94	1	0.38	226	0.31994	0.34261
GO:0015293	symporter activity	94	1	0.38	227	0.31994	0.34261
GO:0061135	endopeptidase regulator activity	100	1	0.41	228	0.33654	0.36004
GO:0097367	carbohydrate derivative binding	1855	13	7.57	105	0.34601	0.06098
GO:0002020	protease binding	104	1	0.42	230	0.34738	0.37141
GO:0042826	histone deacetylase binding	104	1	0.42	231	0.34738	0.37141
GO:0003682	chromatin binding	512	3	2.09	235	0.34782	0.39804
GO:0004888	transmembrane signaling receptor activit...	530	3	2.16	238	0.36806	0.41967
GO:0044325	ion channel binding	115	1	0.47	236	0.3763	0.40165
GO:0031072	heat shock protein binding	116	1	0.47	237	0.37886	0.40433
GO:0042803	protein homodimerization activity	541	3	2.21	241	0.38039	0.43278
GO:0015631	tubulin binding	330	2	1.35	240	0.39119	0.43242
GO:0035257	nuclear hormone receptor binding	130	1	0.53	242	0.41371	0.4406
GO:0019903	protein phosphatase binding	135	1	0.55	243	0.42569	0.45302
GO:0140030	modification-dependent protein binding	139	1	0.57	244	0.43509	0.46276
GO:1901363	heterocyclic compound binding	4918	36	20.06	10	0.44859	0.00019
GO:0003674	molecular_function	13438	57	54.83	294	0.45334	0.96964

## Sheet: Plasma cell
Supplementary Table 2. B cell recluster GO results -- Plasma cell
GO.ID	Term	Annotated	Significant	Expected	Rank in Fisher.classic	Fisher.elim	Fisher.classic
GO:0006910	phagocytosis recognition	26	5	0.02	1	2.1e-12	2.1e-12
GO:0006958	complement activation classical pathway	36	5	0.02	2	1.2e-11	1.2e-11
GO:0030449	regulation of complement activation	40	5	0.03	3	2.1e-11	2.1e-11
GO:0006911	phagocytosis engulfment	61	5	0.04	8	1.9e-10	1.9e-10
GO:0050853	B cell receptor signaling pathway	71	5	0.05	10	4.1e-10	4.1e-10
GO:0050871	positive regulation of B cell activation	84	5	0.06	12	9.6e-10	9.6e-10
GO:0038096	Fc-gamma receptor signaling pathway invo...	87	5	0.06	13	1.2e-09	1.2e-09
GO:0042742	defense response to bacterium	137	5	0.09	22	1.2e-08	1.2e-08
GO:0045087	innate immune response	661	6	0.44	38	9.3e-07	9.3e-07
GO:0001895	retina homeostasis	50	2	0.03	66	0.00047	0.00047
GO:0002377	immunoglobulin production	104	2	0.07	72	0.002	0.002
GO:0038095	Fc-epsilon receptor signaling pathway	112	2	0.07	73	0.00231	0.00231
GO:0045741	positive regulation of epidermal growth ...	10	1	0.01	77	0.00657	0.00657
GO:0060602	branch elongation of an epithelium	12	1	0.01	78	0.00788	0.00788
GO:0060749	mammary gland alveolus development	12	1	0.01	79	0.00788	0.00788
GO:0006898	receptor-mediated endocytosis	228	2	0.15	82	0.00924	0.00924
GO:0060444	branching involved in mammary gland duct...	16	1	0.01	83	0.0105	0.0105
GO:0050864	regulation of B cell activation	126	6	0.08	4	0.01232	4.5e-11
GO:0033622	integrin activation	22	1	0.01	86	0.01441	0.01441
GO:0060603	mammary gland duct morphogenesis	23	1	0.02	87	0.01506	0.01506
GO:0033598	mammary gland epithelial cell proliferat...	24	1	0.02	88	0.01571	0.01571
GO:0010837	regulation of keratinocyte proliferation	25	1	0.02	90	0.01636	0.01636
GO:0060443	mammary gland morphogenesis	32	1	0.02	95	0.02089	0.02089
GO:0043434	response to peptide hormone	351	2	0.23	96	0.02103	0.02103
GO:0043616	keratinocyte proliferation	33	1	0.02	97	0.02154	0.02154
GO:0045668	negative regulation of osteoblast differ...	34	1	0.02	98	0.02219	0.02219
GO:0050900	leukocyte migration	362	2	0.24	99	0.02229	0.02229
GO:0002252	immune effector process	989	7	0.65	33	0.02235	3.2e-07
GO:0000413	protein peptidyl-prolyl isomerization	35	1	0.02	100	0.02283	0.02283
GO:0002639	positive regulation of immunoglobulin pr...	37	1	0.02	103	0.02412	0.02412
GO:0002682	regulation of immune system process	1226	7	0.81	43	0.02571	1.4e-06
GO:0042059	negative regulation of epidermal growth ...	41	1	0.03	106	0.0267	0.0267
GO:0014009	glial cell proliferation	43	1	0.03	107	0.02798	0.02798
GO:1901185	negative regulation of ERBB signaling pa...	45	1	0.03	109	0.02927	0.02927
GO:1901652	response to peptide	424	2	0.28	111	0.02995	0.02995
GO:0002228	natural killer cell mediated immunity	51	1	0.03	113	0.03311	0.03311
GO:0018208	peptidyl-proline modification	52	1	0.03	114	0.03375	0.03375
GO:0046626	regulation of insulin receptor signaling...	54	1	0.04	115	0.03503	0.03503
GO:0030279	negative regulation of ossification	55	1	0.04	116	0.03567	0.03567
GO:0030888	regulation of B cell proliferation	55	1	0.04	117	0.03567	0.03567
GO:0061180	mammary gland epithelium development	55	1	0.04	118	0.03567	0.03567
GO:0002637	regulation of immunoglobulin production	59	1	0.04	119	0.03822	0.03822
GO:1900076	regulation of cellular response to insul...	61	1	0.04	120	0.03949	0.03949
GO:0048207	vesicle targeting rough ER to cis-Golgi	62	1	0.04	121	0.04013	0.04013
GO:0048208	COPII vesicle coating	62	1	0.04	122	0.04013	0.04013
GO:0051591	response to cAMP	65	1	0.04	123	0.04203	0.04203
GO:0042113	B cell activation	230	6	0.15	18	0.04233	1.7e-09
GO:0006901	vesicle coating	66	1	0.04	124	0.04267	0.04267
GO:0090114	COPII-coated vesicle budding	68	1	0.04	125	0.04393	0.04393
GO:0048199	vesicle targeting to from or within Go…	70	1	0.05	126	0.0452	0.0452
GO:0042100	B cell proliferation	71	1	0.05	127	0.04583	0.04583
GO:0048194	Golgi vesicle budding	76	1	0.05	129	0.04899	0.04899
GO:0002702	positive regulation of production of mol...	82	1	0.05	132	0.05276	0.05276
GO:0002449	lymphocyte mediated immunity	222	6	0.15	16	0.05351	1.4e-09
GO:0006903	vesicle targeting	89	1	0.06	133	0.05715	0.05715
GO:0022612	gland morphogenesis	93	1	0.06	135	0.05965	0.05965
GO:0019221	cytokine-mediated signaling pathway	630	2	0.42	136	0.06165	0.06165
GO:0046683	response to organophosphorus	97	1	0.06	137	0.06214	0.06214
GO:0045667	regulation of osteoblast differentiation	98	1	0.06	138	0.06276	0.06276
GO:0006900	vesicle budding from membrane	101	1	0.07	139	0.06463	0.06463
GO:0051384	response to glucocorticoid	102	1	0.07	140	0.06525	0.06525
GO:0048754	branching morphogenesis of an epithelial...	107	1	0.07	142	0.06835	0.06835
GO:0032355	response to estradiol	108	1	0.07	144	0.06897	0.06897
GO:0014074	response to purine-containing compound	109	1	0.07	145	0.06959	0.06959
GO:0007166	cell surface receptor signaling pathway	2460	8	1.62	52	0.07328	8.3e-06
GO:0031960	response to corticosteroid	115	1	0.08	146	0.07329	0.07329
GO:0009725	response to hormone	703	2	0.46	147	0.07487	0.07487
GO:0042542	response to hydrogen peroxide	118	1	0.08	148	0.07513	0.07513
GO:0002700	regulation of production of molecular me...	118	1	0.08	149	0.07513	0.07513
GO:0010033	response to organic substance	2632	4	1.73	150	0.07621	0.07621
GO:0008284	positive regulation of cell population p...	711	2	0.47	151	0.07638	0.07638
GO:0008286	insulin receptor signaling pathway	123	1	0.08	152	0.0782	0.0782
GO:0051897	positive regulation of protein kinase B ...	130	1	0.09	154	0.08249	0.08249
GO:0002697	regulation of immune effector process	332	6	0.22	24	0.08305	1.6e-08
GO:0051249	regulation of lymphocyte activation	394	6	0.26	25	0.08827	4.3e-08
GO:0050679	positive regulation of epithelial cell p...	140	1	0.09	157	0.08857	0.08857
GO:0030278	regulation of ossification	159	1	0.1	162	0.10004	0.10004
GO:0010243	response to organonitrogen compound	846	2	0.56	163	0.10325	0.10325
GO:0002694	regulation of leukocyte activation	458	6	0.3	27	0.10574	1.1e-07
GO:0051896	regulation of protein kinase B signaling	175	1	0.12	165	0.1096	0.1096
GO:0006888	endoplasmic reticulum to Golgi vesicle-m...	177	1	0.12	166	0.11078	0.11078
GO:0002699	positive regulation of immune effector p...	177	1	0.12	167	0.11078	0.11078
GO:0001649	osteoblast differentiation	180	1	0.12	168	0.11256	0.11256
GO:0050670	regulation of lymphocyte proliferation	180	1	0.12	169	0.11256	0.11256
GO:0032944	regulation of mononuclear cell prolifera...	181	1	0.12	170	0.11316	0.11316
GO:0050865	regulation of cell activation	487	6	0.32	28	0.11357	1.5e-07
GO:0071345	cellular response to cytokine stimulus	905	2	0.6	171	0.11578	0.11578
GO:1901698	response to nitrogen compound	906	2	0.6	172	0.116	0.116
GO:0032869	cellular response to insulin stimulus	189	1	0.12	173	0.11788	0.11788
GO:0070663	regulation of leukocyte proliferation	192	1	0.13	174	0.11965	0.11965
GO:0051650	establishment of vesicle localization	196	1	0.13	175	0.122	0.122
GO:0000302	response to reactive oxygen species	196	1	0.13	176	0.122	0.122
GO:0043491	protein kinase B signaling	198	1	0.13	177	0.12317	0.12317
GO:0034097	response to cytokine	972	2	0.64	181	0.13053	0.13053
GO:0051648	vesicle localization	213	1	0.14	182	0.13193	0.13193
GO:0050776	regulation of immune response	733	6	0.48	45	0.1352	1.7e-06
GO:0046651	lymphocyte proliferation	224	1	0.15	183	0.1383	0.1383
GO:0032943	mononuclear cell proliferation	226	1	0.15	184	0.13946	0.13946
GO:0048583	regulation of response to stimulus	3413	8	2.25	60	0.13971	0.00011
GO:0032868	response to insulin	233	1	0.15	185	0.14349	0.14349
GO:0046649	lymphocyte activation	604	6	0.4	35	0.14465	5.5e-07
GO:0070661	leukocyte proliferation	244	1	0.16	186	0.14978	0.14978
GO:0060562	epithelial tube morphogenesis	252	1	0.17	187	0.15434	0.15434
GO:0042221	response to chemical	3356	4	2.21	189	0.15768	0.15768
GO:0050678	regulation of epithelial cell proliferat...	259	1	0.17	190	0.1583	0.1583
GO:0071375	cellular response to peptide hormone sti...	261	1	0.17	191	0.15943	0.15943
GO:0071310	cellular response to organic substance	2168	3	1.43	192	0.15992	0.15992
GO:0002684	positive regulation of immune system pro...	804	6	0.53	49	0.16133	2.9e-06
GO:0042063	gliogenesis	268	1	0.18	193	0.16338	0.16338
GO:0048545	response to steroid hormone	271	1	0.18	194	0.16506	0.16506
GO:0002443	leukocyte mediated immunity	658	6	0.43	37	0.17051	9.1e-07
GO:0050673	epithelial cell proliferation	299	1	0.2	198	0.18065	0.18065
GO:0016477	cell migration	1193	2	0.79	199	0.18225	0.18225
GO:0016050	vesicle organization	313	1	0.21	200	0.18835	0.18835
GO:0001503	ossification	315	1	0.21	201	0.18944	0.18944
GO:1901653	cellular response to peptide	318	1	0.21	202	0.19108	0.19108
GO:0061024	membrane organization	778	6	0.51	47	0.19482	2.4e-06
GO:0048193	Golgi vesicle transport	336	1	0.22	204	0.20085	0.20085
GO:0009719	response to endogenous stimulus	1282	2	0.84	205	0.20411	0.20411
GO:0042127	regulation of cell population proliferat...	1286	2	0.85	206	0.2051	0.2051
GO:0051674	localization of cell	1304	2	0.86	207	0.20958	0.20958
GO:0048870	cell motility	1304	2	0.86	208	0.20958	0.20958
GO:1901700	response to oxygen-containing compound	1311	2	0.86	209	0.21133	0.21133
GO:0006979	response to oxidative stress	376	1	0.25	210	0.22219	0.22219
GO:0051656	establishment of organelle localization	393	1	0.26	211	0.23111	0.23111
GO:0007165	signal transduction	4471	8	2.95	68	0.23583	0.00084
GO:0070887	cellular response to chemical stimulus	2621	3	1.73	212	0.24052	0.24052
GO:0065003	protein-containing complex assembly	1439	2	0.95	213	0.24364	0.24364
GO:0040011	locomotion	1458	2	0.96	214	0.24849	0.24849
GO:0045321	leukocyte activation	1053	6	0.69	54	0.25639	1.4e-05
GO:0010035	response to inorganic substance	450	1	0.3	217	0.26034	0.26034
GO:0008283	cell population proliferation	1508	2	0.99	218	0.26129	0.26129
GO:0023052	signaling	4893	8	3.22	70	0.2776	0.00166
GO:0007154	cell communication	4911	8	3.24	71	0.27942	0.0017
GO:0001775	cell activation	1167	6	0.77	58	0.28293	2.6e-05
GO:0032870	cellular response to hormone stimulus	498	1	0.33	220	0.28419	0.28419
GO:0071417	cellular response to organonitrogen comp...	512	1	0.34	222	0.29102	0.29102
GO:0007169	transmembrane receptor protein tyrosine ...	606	2	0.4	134	0.3004	0.05751
GO:0043933	protein-containing complex subunit organ...	1688	2	1.11	225	0.30774	0.30774
GO:0006928	movement of cell or subcellular componen...	1706	2	1.12	226	0.31239	0.31239
GO:1901699	cellular response to nitrogen compound	559	1	0.37	227	0.31351	0.31351
GO:0045596	negative regulation of cell differentiat...	572	1	0.38	228	0.31962	0.31962
GO:0007186	G protein-coupled receptor signaling pat...	591	1	0.39	229	0.32846	0.32846
GO:0051640	organelle localization	600	1	0.4	231	0.33261	0.33261
GO:0051716	cellular response to stimulus	5670	8	3.74	74	0.35898	0.00499
GO:0016192	vesicle-mediated transport	1755	6	1.16	64	0.36211	0.00026
GO:0035239	tube morphogenesis	670	1	0.44	232	0.36413	0.36413
GO:0033993	response to lipid	687	1	0.45	233	0.37158	0.37158
GO:0003006	developmental process involved in reprod...	694	1	0.46	235	0.37463	0.37463
GO:0014070	response to organic cyclic compound	710	1	0.47	236	0.38154	0.38154
GO:0000165	MAPK cascade	746	1	0.49	237	0.39685	0.39685
GO:0023014	signal transduction by protein phosphory...	754	1	0.5	238	0.40021	0.40021
GO:0007167	enzyme linked receptor protein signaling...	856	2	0.56	164	0.4007	0.10534
GO:0051093	negative regulation of developmental pro...	771	1	0.51	239	0.40728	0.40728
GO:0009887	animal organ morphogenesis	812	1	0.53	243	0.42404	0.42404
GO:0035295	tube development	816	1	0.54	244	0.42565	0.42565
GO:1902533	positive regulation of intracellular sig...	844	1	0.56	245	0.43683	0.43683
GO:0031175	neuron projection development	891	1	0.59	249	0.45515	0.45515
GO:0006950	response to stress	3181	7	2.1	69	0.47043	0.00084
GO:1901701	cellular response to oxygen-containing c...	946	1	0.62	252	0.47592	0.47592
GO:0018193	peptidyl-amino acid modification	1084	2	0.71	188	0.48096	0.15621
GO:0051241	negative regulation of multicellular org...	963	1	0.63	253	0.48219	0.48219
GO:0048666	neuron development	989	1	0.65	254	0.49166	0.49166
GO:0022414	reproductive process	1044	1	0.69	257	0.51119	0.51119
GO:0000003	reproduction	1046	1	0.69	258	0.51188	0.51188
GO:0016043	cellular component organization	5406	7	3.56	102	0.51276	0.02346
GO:0022607	cellular component assembly	2546	2	1.68	259	0.52171	0.52171
GO:0009968	negative regulation of signal transducti...	1088	1	0.72	260	0.52632	0.52632
GO:0071495	cellular response to endogenous stimulus	1094	1	0.72	261	0.52835	0.52835
GO:0071840	cellular component organization or bioge...	5588	7	3.68	108	0.53589	0.02855
GO:0010648	negative regulation of cell communicatio...	1186	1	0.78	264	0.55854	0.55854
GO:0023057	negative regulation of signaling	1189	1	0.78	265	0.5595	0.5595
GO:0030182	neuron differentiation	1192	1	0.79	266	0.56045	0.56045
GO:0044085	cellular component biogenesis	2781	2	1.83	268	0.57462	0.57462
GO:0048699	generation of neurons	1329	1	0.88	271	0.60207	0.60207
GO:0120036	plasma membrane bounded cell projection ...	1357	1	0.89	274	0.61013	0.61013
GO:0048585	negative regulation of response to stimu...	1381	1	0.91	277	0.61693	0.61693
GO:0030030	cell projection organization	1393	1	0.92	278	0.62028	0.62028
GO:0007267	cell-cell signaling	1400	1	0.92	280	0.62223	0.62223
GO:0022008	neurogenesis	1420	1	0.94	281	0.62774	0.62774
GO:0010557	positive regulation of macromolecule bio...	1511	1	1	286	0.65193	0.65193
GO:1902531	regulation of intracellular signal trans...	1542	1	1.02	290	0.65985	0.65985
GO:0045595	regulation of cell differentiation	1570	1	1.03	293	0.66686	0.66686
GO:0050794	regulation of cellular process	8532	8	5.62	160	0.67154	0.09265
GO:0046907	intracellular transport	1592	1	1.05	294	0.67227	0.67227
GO:0006915	apoptotic process	1594	1	1.05	295	0.67276	0.67276
GO:0009891	positive regulation of biosynthetic proc...	1610	1	1.06	296	0.67665	0.67665
GO:0012501	programmed cell death	1647	1	1.09	298	0.68548	0.68548
GO:0048522	positive regulation of cellular process	4560	7	3	81	0.6982	0.00834
GO:0050896	response to stimulus	6695	8	4.41	91	0.70522	0.01688
GO:0048468	cell development	1763	1	1.16	302	0.71179	0.71179
GO:0050789	regulation of biological process	8939	8	5.89	179	0.71293	0.12652
GO:0008219	cell death	1769	1	1.17	303	0.71309	0.71309
GO:0048518	positive regulation of biological proces...	4950	7	3.26	85	0.72688	0.0138
GO:0006810	transport	4121	6	2.72	105	0.7371	0.02597
GO:0051234	establishment of localization	4234	6	2.79	110	0.74934	0.0297
GO:0065007	biological regulation	9406	8	6.2	196	0.75842	0.17636
GO:0007399	nervous system development	2064	1	1.36	308	0.77117	0.77117
GO:0009987	cellular process	12646	9	8.33	256	0.78572	0.49938
GO:0050793	regulation of developmental process	2193	1	1.44	311	0.79309	0.79309
GO:0003823	antigen binding	59	6	0.04	1	3.6e-13	3.6e-13
GO:0034987	immunoglobulin receptor binding	20	5	0.01	2	4.4e-13	4.4e-13
GO:0023023	MHC protein complex binding	25	1	0.02	4	0.016	0.016
GO:0005154	epidermal growth factor receptor binding	28	1	0.02	5	0.018	0.018
GO:0003755	peptidyl-prolyl cis-trans isomerase acti...	31	1	0.02	6	0.02	0.02
GO:0042287	MHC protein binding	32	1	0.02	7	0.02	0.02
GO:0016859	cis-trans isomerase activity	33	1	0.02	8	0.021	0.021
GO:0005102	signaling receptor binding	1179	7	0.76	3	0.037	9.3e-07
GO:0008083	growth factor activity	97	1	0.06	9	0.061	0.061
GO:0070851	growth factor receptor binding	98	1	0.06	10	0.061	0.061
GO:0005125	cytokine activity	121	1	0.08	11	0.075	0.075
GO:0016853	isomerase activity	133	1	0.09	12	0.083	0.083
GO:0030246	carbohydrate binding	184	1	0.12	13	0.113	0.113
GO:0048018	receptor ligand activity	264	1	0.17	14	0.158	0.158
GO:0030546	signaling receptor activator activity	268	1	0.17	15	0.16	0.16
GO:0030545	receptor regulator activity	295	1	0.19	16	0.175	0.175
GO:0004888	transmembrane signaling receptor activit...	530	1	0.34	17	0.294	0.294
GO:0060089	molecular transducer activity	675	1	0.43	18	0.36	0.36
GO:0038023	signaling receptor activity	675	1	0.43	19	0.36	0.36
GO:0044877	protein-containing complex binding	1078	1	0.69	21	0.515	0.515
GO:0140096	catalytic activity acting on a protein	1770	1	1.14	23	0.705	0.705
GO:0005515	protein binding	10921	8	7.04	20	0.79	0.383
GO:0098772	molecular function regulator	2909	1	1.87	25	0.878	0.878
GO:0003674	molecular_function	13438	9	8.66	22	0.889	0.705
GO:0005488	binding	12487	8	8.04	24	0.968	0.753
GO:0003824	catalytic activity	4582	1	2.95	26	0.972	0.972
GO:0000014	single-stranded DNA endodeoxyribonucleas...	10	0	0.01	27	1	1
GO:0000030	mannosyltransferase activity	27	0	0.02	28	1	1
GO:0000049	tRNA binding	63	0	0.04	29	1	1
GO:0000062	fatty-acyl-CoA binding	18	0	0.01	30	1	1
GO:0000146	microfilament motor activity	20	0	0.01	31	1	1
GO:0000149	SNARE binding	106	0	0.07	32	1	1
GO:0000166	nucleotide binding	1834	0	1.18	33	1	1
GO:0000175	3'-5'-exoribonuclease activity	34	0	0.02	34	1	1
GO:0000217	DNA secondary structure binding	32	0	0.02	35	1	1
GO:0000287	magnesium ion binding	183	0	0.12	36	1	1
GO:0000295	adenine nucleotide transmembrane transpo...	27	0	0.02	37	1	1
GO:0000339	RNA cap binding	17	0	0.01	38	1	1
GO:0000340	RNA 7-methylguanosine cap binding	11	0	0.01	39	1	1
GO:0000400	four-way junction DNA binding	17	0	0.01	40	1	1
GO:0000774	adenyl-nucleotide exchange factor activi...	10	0	0.01	41	1	1
GO:0000900	translation repressor activity mRNA reg…	15	0	0.01	42	1	1
GO:0000976	transcription regulatory region sequence...	1174	0	0.76	43	1	1
GO:0000977	RNA polymerase II transcription regulato...	1097	0	0.71	44	1	1
GO:0000978	RNA polymerase II cis-regulatory region ...	902	0	0.58	45	1	1
GO:0000979	RNA polymerase II core promoter sequence...	21	0	0.01	46	1	1
GO:0000981	DNA-binding transcription factor activit...	1121	0	0.72	47	1	1
GO:0000987	cis-regulatory region sequence-specific ...	918	0	0.59	48	1	1
GO:0000993	RNA polymerase II complex binding	35	0	0.02	49	1	1
GO:0001046	core promoter sequence-specific DNA bind...	42	0	0.03	50	1	1
GO:0001067	regulatory region nucleic acid binding	1175	0	0.76	51	1	1
GO:0001085	RNA polymerase II transcription factor b...	42	0	0.03	52	1	1
GO:0001091	RNA polymerase II general transcription ...	17	0	0.01	53	1	1
GO:0001094	TFIID-class transcription factor complex...	10	0	0.01	54	1	1
GO:0001098	basal transcription machinery binding	52	0	0.03	55	1	1
GO:0001099	basal RNA polymerase II transcription ma...	52	0	0.03	56	1	1
GO:0001102	RNA polymerase II activating transcripti...	40	0	0.03	57	1	1
GO:0001103	RNA polymerase II repressing transcripti...	32	0	0.02	58	1	1
GO:0001161	intronic transcription regulatory region...	14	0	0.01	59	1	1
GO:0001162	RNA polymerase II intronic transcription...	12	0	0.01	60	1	1
GO:0001216	DNA-binding transcription activator acti...	374	0	0.24	61	1	1
GO:0001217	DNA-binding transcription repressor acti...	283	0	0.18	62	1	1
GO:0001221	transcription cofactor binding	40	0	0.03	63	1	1
GO:0001222	transcription corepressor binding	14	0	0.01	64	1	1
GO:0001223	transcription coactivator binding	19	0	0.01	65	1	1
GO:0001227	DNA-binding transcription repressor acti...	282	0	0.18	66	1	1
GO:0001228	DNA-binding transcription activator acti...	371	0	0.24	67	1	1
GO:0001530	lipopolysaccharide binding	19	0	0.01	68	1	1
GO:0001540	amyloid-beta binding	73	0	0.05	69	1	1
GO:0001614	purinergic nucleotide receptor activity	14	0	0.01	70	1	1
GO:0001618	virus receptor activity	59	0	0.04	71	1	1
GO:0001637	G protein-coupled chemoattractant recept...	19	0	0.01	72	1	1
GO:0001653	peptide receptor activity	72	0	0.05	73	1	1
GO:0001664	G protein-coupled receptor binding	199	0	0.13	74	1	1
GO:0001671	ATPase activator activity	23	0	0.01	75	1	1
GO:0001784	phosphotyrosine residue binding	39	0	0.03	76	1	1
GO:0001786	phosphatidylserine binding	44	0	0.03	77	1	1
GO:0001846	opsonin binding	10	0	0.01	78	1	1
GO:0001848	complement binding	11	0	0.01	79	1	1
GO:0001882	nucleoside binding	336	0	0.22	80	1	1
GO:0001883	purine nucleoside binding	331	0	0.21	81	1	1
GO:0001965	G-protein alpha-subunit binding	21	0	0.01	82	1	1
GO:0001968	fibronectin binding	20	0	0.01	83	1	1
GO:0001972	retinoic acid binding	11	0	0.01	84	1	1
GO:0002020	protease binding	104	0	0.07	85	1	1
GO:0002039	p53 binding	60	0	0.04	86	1	1
GO:0002161	aminoacyl-tRNA editing activity	11	0	0.01	87	1	1
GO:0003676	nucleic acid binding	3367	0	2.17	88	1	1
GO:0003677	DNA binding	2021	0	1.3	89	1	1
GO:0003678	DNA helicase activity	73	0	0.05	90	1	1
GO:0003682	chromatin binding	512	0	0.33	91	1	1
GO:0003684	damaged DNA binding	62	0	0.04	92	1	1
GO:0003688	DNA replication origin binding	22	0	0.01	93	1	1
GO:0003690	double-stranded DNA binding	1323	0	0.85	94	1	1
GO:0003697	single-stranded DNA binding	107	0	0.07	95	1	1
GO:0003700	DNA-binding transcription factor activit...	1175	0	0.76	96	1	1
GO:0003707	steroid hormone receptor activity	19	0	0.01	97	1	1
GO:0003712	transcription coregulator activity	450	0	0.29	98	1	1
GO:0003713	transcription coactivator activity	244	0	0.16	99	1	1
GO:0003714	transcription corepressor activity	172	0	0.11	100	1	1
GO:0003723	RNA binding	1537	0	0.99	101	1	1
GO:0003724	RNA helicase activity	70	0	0.05	102	1	1
GO:0003725	double-stranded RNA binding	70	0	0.05	103	1	1
GO:0003727	single-stranded RNA binding	79	0	0.05	104	1	1
GO:0003729	mRNA binding	269	0	0.17	105	1	1
GO:0003730	mRNA 3'-UTR binding	82	0	0.05	106	1	1
GO:0003735	structural constituent of ribosome	149	0	0.1	107	1	1
GO:0003743	translation initiation factor activity	46	0	0.03	108	1	1
GO:0003746	translation elongation factor activity	17	0	0.01	109	1	1
GO:0003756	protein disulfide isomerase activity	17	0	0.01	110	1	1
GO:0003774	motor activity	105	0	0.07	111	1	1
GO:0003777	microtubule motor activity	65	0	0.04	112	1	1
GO:0003779	actin binding	368	0	0.24	113	1	1
GO:0003785	actin monomer binding	25	0	0.02	114	1	1
GO:0003841	1-acylglycerol-3-phosphate O-acyltransfe...	15	0	0.01	115	1	1
GO:0003887	DNA-directed DNA polymerase activity	21	0	0.01	116	1	1
GO:0003899	DNA-directed 5'-3' RNA polymerase activi...	39	0	0.03	117	1	1
GO:0003906	DNA-(apurinic or apyrimidinic site) endo...	13	0	0.01	118	1	1
GO:0003924	GTPase activity	281	0	0.18	119	1	1
GO:0003950	NAD+ ADP-ribosyltransferase activity	22	0	0.01	120	1	1
GO:0003951	NAD+ kinase activity	15	0	0.01	121	1	1
GO:0003953	NAD+ nucleosidase activity	12	0	0.01	122	1	1
GO:0003954	NADH dehydrogenase activity	38	0	0.02	123	1	1
GO:0003995	acyl-CoA dehydrogenase activity	11	0	0.01	124	1	1
GO:0004000	adenosine deaminase activity	10	0	0.01	125	1	1
GO:0004029	aldehyde dehydrogenase (NAD+) activity	11	0	0.01	126	1	1
GO:0004030	aldehyde dehydrogenase [NAD(P)+] activit...	11	0	0.01	127	1	1
GO:0004033	aldo-keto reductase (NADP) activity	19	0	0.01	128	1	1
GO:0004065	arylsulfatase activity	10	0	0.01	129	1	1
GO:0004112	cyclic-nucleotide phosphodiesterase acti...	23	0	0.01	130	1	1
GO:0004114	3'5'-cyclic-nucleotide phosphodiesteras…	21	0	0.01	131	1	1
GO:0004115	3'5'-cyclic-AMP phosphodiesterase activ...	12	0	0.01	132	1	1
GO:0004129	cytochrome-c oxidase activity	21	0	0.01	133	1	1
GO:0004175	endopeptidase activity	265	0	0.17	134	1	1
GO:0004177	aminopeptidase activity	37	0	0.02	135	1	1
GO:0004180	carboxypeptidase activity	28	0	0.02	136	1	1
GO:0004181	metallocarboxypeptidase activity	14	0	0.01	137	1	1
GO:0004190	aspartic-type endopeptidase activity	14	0	0.01	138	1	1
GO:0004197	cysteine-type endopeptidase activity	77	0	0.05	139	1	1
GO:0004222	metalloendopeptidase activity	72	0	0.05	140	1	1
GO:0004252	serine-type endopeptidase activity	77	0	0.05	141	1	1
GO:0004298	threonine-type endopeptidase activity	20	0	0.01	142	1	1
GO:0004300	enoyl-CoA hydratase activity	10	0	0.01	143	1	1
GO:0004364	glutathione transferase activity	18	0	0.01	144	1	1
GO:0004386	helicase activity	149	0	0.1	145	1	1
GO:0004402	histone acetyltransferase activity	50	0	0.03	146	1	1
GO:0004407	histone deacetylase activity	24	0	0.02	147	1	1
GO:0004435	phosphatidylinositol phospholipase C act...	20	0	0.01	148	1	1
GO:0004438	phosphatidylinositol-3-phosphatase activ...	17	0	0.01	149	1	1
GO:0004467	long-chain fatty acid-CoA ligase activit...	11	0	0.01	150	1	1
GO:0004497	monooxygenase activity	49	0	0.03	151	1	1
GO:0004518	nuclease activity	183	0	0.12	152	1	1
GO:0004519	endonuclease activity	109	0	0.07	153	1	1
GO:0004520	endodeoxyribonuclease activity	36	0	0.02	154	1	1
GO:0004521	endoribonuclease activity	60	0	0.04	155	1	1
GO:0004526	ribonuclease P activity	12	0	0.01	156	1	1
GO:0004527	exonuclease activity	74	0	0.05	157	1	1
GO:0004529	exodeoxyribonuclease activity	19	0	0.01	158	1	1
GO:0004532	exoribonuclease activity	38	0	0.02	159	1	1
GO:0004535	poly(A)-specific ribonuclease activity	12	0	0.01	160	1	1
GO:0004536	deoxyribonuclease activity	52	0	0.03	161	1	1
GO:0004540	ribonuclease activity	103	0	0.07	162	1	1
GO:0004549	tRNA-specific ribonuclease activity	15	0	0.01	163	1	1
GO:0004550	nucleoside diphosphate kinase activity	16	0	0.01	164	1	1
GO:0004551	nucleotide diphosphatase activity	16	0	0.01	165	1	1
GO:0004553	hydrolase activity hydrolyzing O-glycos…	67	0	0.04	166	1	1
GO:0004559	alpha-mannosidase activity	14	0	0.01	167	1	1
GO:0004596	peptide alpha-N-acetyltransferase activi...	10	0	0.01	168	1	1
GO:0004601	peroxidase activity	37	0	0.02	169	1	1
GO:0004602	glutathione peroxidase activity	16	0	0.01	170	1	1
GO:0004620	phospholipase activity	74	0	0.05	171	1	1
GO:0004622	lysophospholipase activity	18	0	0.01	172	1	1
GO:0004623	phospholipase A2 activity	20	0	0.01	173	1	1
GO:0004629	phospholipase C activity	21	0	0.01	174	1	1
GO:0004652	polynucleotide adenylyltransferase activ...	12	0	0.01	175	1	1
GO:0004653	polypeptide N-acetylgalactosaminyltransf...	17	0	0.01	176	1	1
GO:0004659	prenyltransferase activity	16	0	0.01	177	1	1
GO:0004672	protein kinase activity	495	0	0.32	178	1	1
GO:0004674	protein serine/threonine kinase activity	394	0	0.25	179	1	1
GO:0004675	transmembrane receptor protein serine/th...	16	0	0.01	180	1	1
GO:0004683	calmodulin-dependent protein kinase acti...	27	0	0.02	181	1	1
GO:0004693	cyclin-dependent protein serine/threonin...	27	0	0.02	182	1	1
GO:0004697	protein kinase C activity	15	0	0.01	183	1	1
GO:0004698	calcium-dependent protein kinase C activ...	15	0	0.01	184	1	1
GO:0004707	MAP kinase activity	19	0	0.01	185	1	1
GO:0004708	MAP kinase kinase activity	17	0	0.01	186	1	1
GO:0004709	MAP kinase kinase kinase activity	22	0	0.01	187	1	1
GO:0004712	protein serine/threonine/tyrosine kinase...	43	0	0.03	188	1	1
GO:0004713	protein tyrosine kinase activity	114	0	0.07	189	1	1
GO:0004714	transmembrane receptor protein tyrosine ...	46	0	0.03	190	1	1
GO:0004715	non-membrane spanning protein tyrosine k...	42	0	0.03	191	1	1
GO:0004721	phosphoprotein phosphatase activity	156	0	0.1	192	1	1
GO:0004722	protein serine/threonine phosphatase act...	66	0	0.04	193	1	1
GO:0004724	magnesium-dependent protein serine/threo...	11	0	0.01	194	1	1
GO:0004725	protein tyrosine phosphatase activity	87	0	0.06	195	1	1
GO:0004806	triglyceride lipase activity	12	0	0.01	196	1	1
GO:0004812	aminoacyl-tRNA ligase activity	39	0	0.03	197	1	1
GO:0004842	ubiquitin-protein transferase activity	367	0	0.24	198	1	1
GO:0004843	thiol-dependent ubiquitin-specific prote...	84	0	0.05	199	1	1
GO:0004857	enzyme inhibitor activity	258	0	0.17	200	1	1
