# Supplementary material for: Analysis of Cellular Heterogeneity in Immune Microenvironment of Primary Central Nervous System Lymphoma by Single-Cell Sequencing
Source: Front Oncol. 2021 Oct 4;11:683007. doi: 10.3389/fonc.2021.683007 (PMC8523033; doi:10.3389/fonc.2021.683007)
Supplement: Supplementary file 4 [file Table_4.xlsx]

## Sheet: T helper
Supplementary Table 4. T cell recluster GO results -- T helper
GO.ID	Term	Annotated	Significant	Expected	Rank in Fisher.classic	Fisher.elim	Fisher.classic
GO:0031145	anaphase-promoting complex-dependent cat...	80	6	0.5	12	1e-05	1.2e-05
GO:0051301	cell division	542	13	3.37	15	2.8e-05	4.1e-05
GO:0043928	exonucleolytic catabolism of deadenylate...	33	4	0.21	18	5e-05	5.7e-05
GO:0006123	mitochondrial electron transport cytoch…	17	3	0.11	24	0.00015	0.00016
GO:0045840	positive regulation of mitotic nuclear d...	48	4	0.3	28	0.00022	0.00025
GO:0010499	proteasomal ubiquitin-independent protei...	21	3	0.13	35	0.00029	0.00032
GO:0000226	microtubule cytoskeleton organization	521	11	3.24	39	0.00037	0.0005
GO:0000398	mRNA splicing via spliceosome	337	11	2.1	9	0.00043	1e-05
GO:0015949	nucleobase-containing small molecule int...	25	3	0.16	42	0.00048	0.00054
GO:0008334	histone mRNA metabolic process	25	3	0.16	43	0.00048	0.00054
GO:0006221	pyrimidine nucleotide biosynthetic proce...	29	3	0.18	57	0.00076	0.00084
GO:1902036	regulation of hematopoietic stem cell di...	69	4	0.43	60	0.00089	0.00101
GO:0061418	regulation of transcription from RNA pol...	73	4	0.45	67	0.0011	0.00125
GO:0006369	termination of RNA polymerase II transcr...	33	3	0.21	66	0.00111	0.00123
GO:0000278	mitotic cell cycle	940	24	5.85	1	0.00116	3.2e-09
GO:0009162	deoxyribonucleoside monophosphate metabo...	10	2	0.06	77	0.00167	0.00179
GO:0043471	regulation of cellular carbohydrate cata...	10	2	0.06	78	0.00167	0.00179
GO:0061687	detoxification of inorganic compound	10	2	0.06	79	0.00167	0.00179
GO:0000387	spliceosomal snRNP assembly	38	3	0.24	83	0.00168	0.00185
GO:0006259	DNA metabolic process	834	15	5.19	29	0.00201	0.00026
GO:0097501	stress response to metal ion	11	2	0.07	86	0.00203	0.00217
GO:0006449	regulation of translational termination	11	2	0.07	87	0.00203	0.00217
GO:0016032	viral process	847	13	5.27	101	0.00212	0.0029
GO:0031146	SCF-dependent proteasomal ubiquitin-depe...	89	4	0.55	94	0.00228	0.00259
GO:0010972	negative regulation of G2/M transition o...	89	4	0.55	95	0.00228	0.00259
GO:0009265	2'-deoxyribonucleotide biosynthetic proc...	12	2	0.07	96	0.00243	0.0026
GO:0070498	interleukin-1-mediated signaling pathway	94	4	0.58	108	0.00278	0.00316
GO:0043558	regulation of translational initiation i...	13	2	0.08	105	0.00285	0.00306
GO:0009130	pyrimidine nucleoside monophosphate bios...	14	2	0.09	112	0.00332	0.00355
GO:0046686	response to cadmium ion	50	3	0.31	119	0.00369	0.00407
GO:0051384	response to glucocorticoid	102	4	0.63	124	0.00374	0.00423
GO:0048535	lymph node development	15	2	0.09	120	0.00381	0.00408
GO:0071294	cellular response to zinc ion	16	2	0.1	128	0.00434	0.00464
GO:0001906	cell killing	107	4	0.67	131	0.00443	0.00501
GO:0030071	regulation of mitotic metaphase/anaphase...	55	3	0.34	136	0.00483	0.00532
GO:0071280	cellular response to copper ion	17	2	0.11	134	0.0049	0.00524
GO:0009200	deoxyribonucleoside triphosphate metabol...	17	2	0.11	135	0.0049	0.00524
GO:0010608	posttranscriptional regulation of gene e...	595	13	3.7	22	0.00493	0.00011
GO:0006521	regulation of cellular amino acid metabo...	56	3	0.35	139	0.00508	0.0056
GO:0009148	pyrimidine nucleoside triphosphate biosy...	18	2	0.11	141	0.00549	0.00587
GO:0009219	pyrimidine deoxyribonucleotide metabolic...	18	2	0.11	142	0.00549	0.00587
GO:0035690	cellular response to drug	58	3	0.36	144	0.00561	0.00617
GO:0043281	regulation of cysteine-type endopeptidas...	184	5	1.14	152	0.00578	0.00668
GO:0032516	positive regulation of phosphoprotein ph...	19	2	0.12	150	0.00611	0.00653
GO:0033962	P-body assembly	20	2	0.12	153	0.00676	0.00723
GO:0006448	regulation of translational elongation	20	2	0.12	154	0.00676	0.00723
GO:0070262	peptidyl-serine dephosphorylation	20	2	0.12	155	0.00676	0.00723
GO:0045727	positive regulation of translation	122	4	0.76	159	0.00703	0.00793
GO:0002833	positive regulation of response to bioti...	194	5	1.21	161	0.0072	0.00831
GO:0044772	mitotic cell cycle phase transition	531	14	3.3	8	0.00727	6.9e-06
GO:0065004	protein-DNA complex assembly	197	5	1.23	165	0.00766	0.00884
GO:0045087	innate immune response	661	10	4.11	173	0.00779	0.00988
GO:0007346	regulation of mitotic cell cycle	578	16	3.6	5	0.00781	7.3e-07
GO:0010605	negative regulation of macromolecule met...	2510	28	15.62	73	0.008	0.00164
GO:0032069	regulation of nuclease activity	22	2	0.14	164	0.00815	0.00872
GO:0031349	positive regulation of defense response	289	6	1.8	180	0.00922	0.01085
GO:0032481	positive regulation of type I interferon...	70	3	0.44	176	0.00943	0.01037
GO:0006283	transcription-coupled nucleotide-excisio...	70	3	0.44	177	0.00943	0.01037
GO:0002479	antigen processing and presentation of e...	71	3	0.44	179	0.0098	0.01077
GO:0072655	establishment of protein localization to...	135	4	0.84	183	0.00997	0.01122
GO:0034620	cellular response to unfolded protein	135	4	0.84	184	0.00997	0.01122
GO:0001738	morphogenesis of a polarized epithelium	136	4	0.85	185	0.01022	0.01151
GO:0097421	liver regeneration	25	2	0.16	182	0.01046	0.01118
GO:0006919	activation of cysteine-type endopeptidas...	75	3	0.47	191	0.01138	0.0125
GO:0051028	mRNA transport	142	4	0.88	194	0.01184	0.01331
GO:0009147	pyrimidine nucleoside triphosphate metab...	20	3	0.12	31	0.01213	0.00027
GO:0006882	cellular zinc ion homeostasis	28	2	0.17	195	0.01302	0.01391
GO:0070979	protein K11-linked ubiquitination	29	2	0.18	200	0.01393	0.01488
GO:0045737	positive regulation of cyclin-dependent ...	29	2	0.18	201	0.01393	0.01488
GO:0007059	chromosome segregation	291	8	1.81	45	0.01393	0.00057
GO:0001909	leukocyte mediated cytotoxicity	81	3	0.5	203	0.014	0.01536
GO:0000209	protein polyubiquitination	318	6	1.98	216	0.01427	0.0167
GO:0071276	cellular response to cadmium ion	30	2	0.19	206	0.01487	0.01588
GO:0032735	positive regulation of interleukin-12 pr...	30	2	0.19	207	0.01487	0.01588
GO:0055069	zinc ion homeostasis	30	2	0.19	208	0.01487	0.01588
GO:0071548	response to dexamethasone	30	2	0.19	209	0.01487	0.01588
GO:0034097	response to cytokine	972	15	6.05	69	0.0149	0.00128
GO:0006913	nucleocytoplasmic transport	322	6	2	223	0.0151	0.01765
GO:0051169	nuclear transport	325	6	2.02	229	0.01574	0.01839
GO:0033209	tumor necrosis factor-mediated signaling...	155	4	0.96	224	0.01588	0.01782
GO:0000083	regulation of transcription involved in ...	32	2	0.2	226	0.01682	0.01796
GO:0090090	negative regulation of canonical Wnt sig...	158	4	0.98	232	0.01692	0.01898
GO:1901654	response to ketone	159	4	0.99	236	0.01727	0.01937
GO:0042769	DNA damage response detection of DNA da…	33	2	0.21	234	0.01783	0.01903
GO:1904031	positive regulation of cyclin-dependent ...	33	2	0.21	235	0.01783	0.01903
GO:0010965	regulation of mitotic sister chromatid s...	58	4	0.36	40	0.01797	0.00052
GO:0043243	positive regulation of protein-containin...	34	2	0.21	238	0.01887	0.02014
GO:0006296	nucleotide-excision repair DNA incision…	34	2	0.21	239	0.01887	0.02014
GO:0016458	gene silencing	247	5	1.54	246	0.01889	0.0216
GO:0002223	stimulatory C-type lectin receptor signa...	92	3	0.57	245	0.01963	0.0215
GO:0010389	regulation of G2/M transition of mitotic...	185	7	1.15	27	0.01967	0.00019
GO:0033683	nucleotide-excision repair DNA incision	35	2	0.22	244	0.01993	0.02127
GO:0071897	DNA biosynthetic process	168	4	1.05	252	0.02069	0.02317
GO:0010629	negative regulation of gene expression	1870	22	11.64	107	0.02077	0.00316
GO:0002220	innate immune response activating cell s...	94	3	0.58	250	0.02077	0.02274
GO:0051276	chromosome organization	1093	15	6.8	118	0.02118	0.00398
GO:0051649	establishment of localization in cell	2425	23	15.09	295	0.02134	0.03144
GO:0060828	regulation of canonical Wnt signaling pa...	255	5	1.59	260	0.02135	0.02439
GO:0006626	protein targeting to mitochondrion	95	3	0.59	253	0.02135	0.02338
GO:0002758	innate immune response-activating signal...	95	3	0.59	254	0.02135	0.02338
GO:0010564	regulation of cell cycle process	668	16	4.16	7	0.02147	4.8e-06
GO:0045089	positive regulation of innate immune res...	170	4	1.06	259	0.02151	0.02407
GO:0034655	nucleobase-containing compound catabolic...	503	11	3.13	37	0.02156	0.00037
GO:0022402	cell cycle process	1217	24	7.57	4	0.02181	4.4e-07
GO:0006458	'de novo' protein folding	37	2	0.23	255	0.02213	0.02361
GO:2000816	negative regulation of mitotic sister ch...	37	2	0.23	256	0.02213	0.02361
GO:1905819	negative regulation of chromosome separa...	37	2	0.23	257	0.02213	0.02361
GO:0071345	cellular response to cytokine stimulus	905	14	5.63	82	0.02216	0.00184
GO:0043488	regulation of mRNA stability	172	4	1.07	266	0.02234	0.025
GO:0046683	response to organophosphorus	97	3	0.6	261	0.02255	0.02467
GO:0006310	DNA recombination	259	5	1.61	268	0.02265	0.02586
GO:0019985	translesion synthesis	38	2	0.24	262	0.02327	0.02482
GO:0098760	response to interleukin-7	38	2	0.24	263	0.02327	0.02482
GO:0098761	cellular response to interleukin-7	38	2	0.24	264	0.02327	0.02482
GO:0009409	response to cold	38	2	0.24	265	0.02327	0.02482
GO:0006996	organelle organization	3516	39	21.88	23	0.02346	0.00012
GO:0043487	regulation of RNA stability	179	4	1.11	279	0.0254	0.02839
GO:0033048	negative regulation of mitotic sister ch...	40	2	0.25	271	0.02562	0.02732
GO:0060071	Wnt signaling pathway planar cell polar…	102	3	0.63	275	0.02568	0.02809
GO:0031503	protein-containing complex localization	268	5	1.67	282	0.02578	0.02938
GO:0040029	regulation of gene expression epigeneti…	181	4	1.13	284	0.02632	0.02941
GO:0038093	Fc receptor signaling pathway	182	4	1.13	289	0.02679	0.02993
GO:0007595	lactation	41	2	0.26	281	0.02682	0.0286
GO:0090175	regulation of establishment of planar po...	104	3	0.65	285	0.027	0.02952
GO:0060964	regulation of gene silencing by miRNA	105	3	0.65	290	0.02767	0.03025
GO:0045814	negative regulation of gene expression …	105	3	0.65	291	0.02767	0.03025
GO:0002437	inflammatory response to antigenic stimu...	42	2	0.26	286	0.02805	0.0299
GO:0033046	negative regulation of sister chromatid ...	42	2	0.26	287	0.02805	0.0299
GO:0051985	negative regulation of chromosome segreg...	42	2	0.26	288	0.02805	0.0299
GO:0046700	heterocycle catabolic process	530	11	3.3	46	0.02815	0.00058
GO:0044270	cellular nitrogen compound catabolic pro...	532	11	3.31	47	0.02869	0.0006
GO:0050657	nucleic acid transport	186	4	1.16	298	0.02871	0.03205
GO:0050658	RNA transport	186	4	1.16	299	0.02871	0.03205
GO:0051983	regulation of chromosome segregation	99	5	0.62	38	0.02883	0.00044
GO:0032392	DNA geometric change	107	3	0.67	297	0.02905	0.03174
GO:0030178	negative regulation of Wnt signaling pat...	187	4	1.16	305	0.0292	0.0326
GO:1902749	regulation of cell cycle G2/M phase tran...	201	7	1.25	33	0.02933	0.00031
GO:0060966	regulation of gene silencing by RNA	108	3	0.67	300	0.02975	0.0325
GO:0060147	regulation of posttranscriptional gene s...	108	3	0.67	301	0.02975	0.0325
GO:0006406	mRNA export from nucleus	108	3	0.67	302	0.02975	0.0325
GO:0071427	mRNA-containing ribonucleoprotein comple...	108	3	0.67	303	0.02975	0.0325
GO:0051236	establishment of RNA localization	189	4	1.18	307	0.0302	0.0337
GO:0051204	protein insertion into mitochondrial mem...	44	2	0.27	304	0.03058	0.03259
GO:0061013	regulation of mRNA catabolic process	191	4	1.19	309	0.03122	0.03483
GO:0019439	aromatic compound catabolic process	542	11	3.37	52	0.03148	0.0007
GO:0038095	Fc-epsilon receptor signaling pathway	112	3	0.7	313	0.03263	0.03563
GO:0000731	DNA synthesis involved in DNA repair	46	2	0.29	311	0.03319	0.03536
GO:0032655	regulation of interleukin-12 production	46	2	0.29	312	0.03319	0.03536
GO:0006338	chromatin remodeling	196	4	1.22	319	0.03386	0.03774
GO:0042267	natural killer cell mediated cytotoxicit...	47	2	0.29	315	0.03452	0.03678
GO:0032615	interleukin-12 production	47	2	0.29	316	0.03452	0.03678
GO:0030968	endoplasmic reticulum unfolded protein r...	115	3	0.72	320	0.03489	0.03807
GO:0060070	canonical Wnt signaling pathway	291	5	1.81	328	0.03498	0.03972
GO:0051306	mitotic sister chromatid separation	61	4	0.38	49	0.03563	0.00063
GO:0043280	positive regulation of cysteine-type end...	116	3	0.72	324	0.03566	0.03891
GO:0090151	establishment of protein localization to...	48	2	0.3	321	0.03588	0.03822
GO:0006301	postreplication repair	48	2	0.3	322	0.03588	0.03822
GO:0032103	positive regulation of response to exter...	394	6	2.45	338	0.03602	0.0416
GO:0007164	establishment of tissue polarity	117	3	0.73	329	0.03643	0.03975
GO:0001736	establishment of planar polarity	117	3	0.73	330	0.03643	0.03975
GO:0010948	negative regulation of cell cycle proces...	299	8	1.86	51	0.03683	0.00068
GO:0006457	protein folding	202	4	1.26	335	0.03719	0.04142
GO:0070527	platelet aggregation	49	2	0.3	326	0.03726	0.03968
GO:0045839	negative regulation of mitotic nuclear d...	49	2	0.3	327	0.03726	0.03968
GO:1901361	organic cyclic compound catabolic proces...	562	11	3.5	59	0.03761	0.00094
GO:0071103	DNA conformation change	297	5	1.85	344	0.03768	0.04274
GO:0097549	chromatin organization involved in negat...	119	3	0.74	336	0.03802	0.04146
GO:0002218	activation of innate immune response	119	3	0.74	337	0.03802	0.04146
GO:2000378	negative regulation of reactive oxygen s...	50	2	0.31	333	0.03866	0.04117
GO:0043388	positive regulation of DNA binding	50	2	0.31	334	0.03866	0.04117
GO:0043486	histone exchange	51	2	0.32	340	0.04008	0.04267
GO:0034508	centromere complex assembly	51	2	0.32	341	0.04008	0.04267
GO:0002228	natural killer cell mediated immunity	51	2	0.32	342	0.04008	0.04267
GO:0019221	cytokine-mediated signaling pathway	630	11	3.92	90	0.04074	0.00233
GO:1903707	negative regulation of hemopoiesis	123	3	0.77	351	0.04129	0.045
GO:1905818	regulation of chromosome separation	62	4	0.39	50	0.04144	0.00067
GO:0043687	post-translational protein modification	305	5	1.9	361	0.04147	0.04698
GO:0051784	negative regulation of nuclear division	52	2	0.32	345	0.04152	0.0442
GO:0071426	ribonucleoprotein complex export from nu...	124	3	0.77	354	0.04213	0.04591
GO:0071166	ribonucleoprotein complex localization	125	3	0.78	358	0.04298	0.04683
GO:0060968	regulation of gene silencing	125	3	0.78	359	0.04298	0.04683
GO:1903047	mitotic cell cycle process	812	20	5.05	3	0.04426	1.6e-07
GO:0009411	response to UV	127	3	0.79	364	0.0447	0.04869
GO:0010038	response to metal ion	289	7	1.8	98	0.04515	0.0026
GO:0060395	SMAD protein signal transduction	55	2	0.34	365	0.04595	0.04889
GO:0072091	regulation of stem cell proliferation	55	2	0.34	366	0.04595	0.04889
GO:0007088	regulation of mitotic nuclear division	147	7	0.91	16	0.0473	4.4e-05
GO:1903311	regulation of mRNA metabolic process	318	5	1.98	378	0.04811	0.05438
GO:2001056	positive regulation of cysteine-type end...	131	3	0.82	371	0.04824	0.05252
GO:0030111	regulation of Wnt signaling pathway	319	5	1.98	379	0.04864	0.05498
GO:0006403	RNA localization	221	4	1.38	377	0.04896	0.05436
GO:0031100	animal organ regeneration	57	2	0.35	370	0.04899	0.05212
GO:0034401	chromatin organization involved in regul...	132	3	0.82	373	0.04915	0.0535
GO:0051346	negative regulation of hydrolase activit...	320	5	1.99	383	0.04918	0.05558
GO:0002449	lymphocyte mediated immunity	222	4	1.38	380	0.04963	0.05509
GO:0033260	nuclear DNA replication	58	2	0.36	374	0.05054	0.05376
GO:0009206	purine ribonucleoside triphosphate biosy...	58	2	0.36	375	0.05054	0.05376
GO:0002709	regulation of T cell mediated immunity	58	2	0.36	376	0.05054	0.05376
GO:0090263	positive regulation of canonical Wnt sig...	134	3	0.83	382	0.05099	0.05548
GO:0006405	RNA export from nucleus	135	3	0.84	385	0.05192	0.05649
GO:0005200	structural constituent of cytoskeleton	73	7	0.44	2	2.6e-07	3.3e-07
GO:0003723	RNA binding	1537	31	9.24	1	1.4e-06	1.1e-09
GO:0043021	ribonucleoprotein complex binding	127	7	0.76	3	1.1e-05	1.4e-05
GO:0005515	protein binding	10921	82	65.66	4	3.5e-05	3.7e-05
GO:0017070	U6 snRNA binding	14	3	0.08	5	7.3e-05	8.1e-05
GO:0004298	threonine-type endopeptidase activity	20	3	0.12	8	0.00022	0.00025
GO:0003697	single-stranded DNA binding	107	5	0.64	10	0.00046	0.00054
GO:0003725	double-stranded RNA binding	70	4	0.42	12	0.00082	0.00094
GO:0043539	protein serine/threonine kinase activato...	32	3	0.19	13	0.00092	0.00102
GO:0072542	protein phosphatase activator activity	12	2	0.07	14	0.00227	0.00243
GO:0051087	chaperone binding	94	4	0.57	15	0.00246	0.00279
GO:0034450	ubiquitin-ubiquitin ligase activity	13	2	0.08	16	0.00267	0.00286
GO:0051082	unfolded protein binding	99	4	0.6	17	0.00297	0.00337
GO:0003746	translation elongation factor activity	17	2	0.1	20	0.00458	0.00491
GO:0019904	protein domain specific binding	637	10	3.83	22	0.00477	0.00612
GO:0001530	lipopolysaccharide binding	19	2	0.11	21	0.00572	0.00612
GO:0004129	cytochrome-c oxidase activity	21	2	0.13	23	0.00697	0.00745
GO:0003688	DNA replication origin binding	22	2	0.13	28	0.00763	0.00817
GO:0016853	isomerase activity	133	4	0.8	30	0.00842	0.00951
GO:0019901	protein kinase binding	592	9	3.56	36	0.00902	0.01125
GO:0097602	cullin family protein binding	24	2	0.14	31	0.00905	0.00968
GO:0044389	ubiquitin-like protein ligase binding	301	6	1.81	35	0.00949	0.01118
GO:0008157	protein phosphatase 1 binding	26	2	0.16	37	0.01057	0.01131
GO:0008144	drug binding	76	3	0.46	38	0.01075	0.01182
GO:0005164	tumor necrosis factor receptor binding	28	2	0.17	39	0.0122	0.01305
GO:0015631	tubulin binding	330	6	1.98	42	0.01444	0.01693
GO:0004869	cysteine-type endopeptidase inhibitor ac...	34	2	0.2	43	0.01769	0.0189
GO:0008536	Ran GTPase binding	34	2	0.2	44	0.01769	0.0189
GO:0031492	nucleosomal DNA binding	36	2	0.22	46	0.01972	0.02106
GO:0046982	protein heterodimerization activity	264	5	1.59	50	0.02137	0.02445
GO:0036002	pre-mRNA binding	38	2	0.23	48	0.02183	0.02331
GO:0032813	tumor necrosis factor receptor superfami...	41	2	0.25	51	0.02517	0.02686
GO:0003924	GTPase activity	281	5	1.69	52	0.02707	0.03088
GO:0031625	ubiquitin protein ligase binding	283	5	1.7	53	0.02779	0.0317
GO:0016538	cyclin-dependent protein serine/threonin...	45	2	0.27	54	0.02992	0.03192
GO:0003682	chromatin binding	512	7	3.08	55	0.03422	0.04027
GO:0043022	ribosome binding	54	2	0.32	57	0.04179	0.04452
GO:0005525	GTP binding	324	5	1.95	58	0.04551	0.05156
GO:0032550	purine ribonucleoside binding	328	5	1.97	59	0.04753	0.05381
GO:0032549	ribonucleoside binding	331	5	1.99	60	0.04908	0.05554
GO:0001883	purine nucleoside binding	331	5	1.99	61	0.04908	0.05554
GO:0042802	identical protein binding	1587	15	9.54	72	0.05003	0.06472
GO:0001882	nucleoside binding	336	5	2.02	63	0.05173	0.05849
GO:0032561	guanyl ribonucleotide binding	339	5	2.04	64	0.05336	0.06031
GO:0019001	guanyl nucleotide binding	339	5	2.04	65	0.05336	0.06031
GO:0003684	damaged DNA binding	62	2	0.37	62	0.05356	0.05699
GO:0008017	microtubule binding	240	4	1.44	69	0.05654	0.06274
GO:0099186	structural constituent of postsynapse	10	1	0.06	66	0.05854	0.06057
GO:0019855	calcium channel inhibitor activity	10	1	0.06	67	0.05854	0.06057
GO:0032404	mismatch repair complex binding	10	1	0.06	68	0.05854	0.06057
GO:0004722	protein serine/threonine phosphatase act...	66	2	0.4	70	0.05983	0.06364
GO:0031491	nucleosome binding	66	2	0.4	71	0.05983	0.06364
GO:1990825	sequence-specific mRNA binding	11	1	0.07	73	0.06421	0.06643
GO:0005522	profilin binding	11	1	0.07	74	0.06421	0.06643
GO:0001972	retinoic acid binding	11	1	0.07	75	0.06421	0.06643
GO:0008301	DNA binding bending	11	1	0.07	76	0.06421	0.06643
GO:0017166	vinculin binding	11	1	0.07	77	0.06421	0.06643
GO:0005212	structural constituent of eye lens	11	1	0.07	78	0.06421	0.06643
GO:0008179	adenylate cyclase binding	11	1	0.07	79	0.06421	0.06643
GO:0008308	voltage-gated anion channel activity	12	1	0.07	80	0.06984	0.07225
GO:0072341	modified amino acid binding	73	2	0.44	82	0.07138	0.07585
GO:0016462	pyrophosphatase activity	735	8	4.42	95	0.07398	0.08677
GO:0016817	hydrolase activity acting on acid anhyd…	738	8	4.44	96	0.07536	0.08834
GO:0016818	hydrolase activity acting on acid anhyd…	738	8	4.44	97	0.07536	0.08834
GO:0019104	DNA N-glycosylase activity	13	1	0.08	84	0.07543	0.07803
GO:0030983	mismatched DNA binding	13	1	0.08	85	0.07543	0.07803
GO:0034185	apolipoprotein binding	13	1	0.08	86	0.07543	0.07803
GO:0005501	retinoid binding	13	1	0.08	87	0.07543	0.07803
GO:0015037	peptide disulfide oxidoreductase activit...	13	1	0.08	88	0.07543	0.07803
GO:0043130	ubiquitin binding	76	2	0.46	90	0.07653	0.08129
GO:0044877	protein-containing complex binding	1078	16	6.48	11	0.08065	0.00091
GO:0005324	long-chain fatty acid transporter activi...	14	1	0.08	93	0.081	0.08378
GO:0019840	isoprenoid binding	14	1	0.08	94	0.081	0.08378
GO:0031681	G-protein beta-subunit binding	15	1	0.09	98	0.08653	0.08949
GO:0000900	translation repressor activity mRNA reg…	15	1	0.09	99	0.08653	0.08949
GO:0098641	cadherin binding involved in cell-cell a...	15	1	0.09	100	0.08653	0.08949
GO:0022829	wide pore channel activity	15	1	0.09	101	0.08653	0.08949
GO:0005092	GDP-dissociation inhibitor activity	16	1	0.1	103	0.09203	0.09516
GO:0098918	structural constituent of synapse	16	1	0.1	104	0.09203	0.09516
GO:0004550	nucleoside diphosphate kinase activity	16	1	0.1	105	0.09203	0.09516
GO:0008022	protein C-terminus binding	179	3	1.08	110	0.0931	0.10081
GO:0033218	amide binding	289	4	1.74	111	0.09626	0.10601
GO:0016864	intramolecular oxidoreductase activity …	17	1	0.1	106	0.09749	0.1008
GO:0000400	four-way junction DNA binding	17	1	0.1	107	0.09749	0.1008
GO:0003756	protein disulfide isomerase activity	17	1	0.1	108	0.09749	0.1008
GO:0043024	ribosomal small subunit binding	17	1	0.1	109	0.09749	0.1008
GO:0140097	catalytic activity acting on DNA	184	3	1.11	114	0.09909	0.10722
GO:0017116	single-stranded DNA helicase activity	18	1	0.11	112	0.10293	0.10641
GO:0070034	telomerase RNA binding	18	1	0.11	113	0.10293	0.10641
GO:0004866	endopeptidase inhibitor activity	92	2	0.55	119	0.10582	0.11216
GO:0030414	peptidase inhibitor activity	93	2	0.56	121	0.10774	0.11418
GO:0043138	3'-5' DNA helicase activity	19	1	0.11	115	0.10833	0.11198
GO:0070182	DNA polymerase binding	19	1	0.11	116	0.10833	0.11198
GO:0042288	MHC class I protein binding	19	1	0.11	117	0.10833	0.11198
GO:0061608	nuclear import signal receptor activity	19	1	0.11	118	0.10833	0.11198
GO:0031490	chromatin DNA binding	94	2	0.57	122	0.10967	0.11621
GO:0032182	ubiquitin-like protein binding	94	2	0.57	123	0.10967	0.11621
GO:0045296	cadherin binding	304	4	1.83	125	0.1105	0.12142
GO:0042056	chemoattractant activity	20	1	0.12	124	0.1137	0.11752
GO:0008134	transcription factor binding	553	6	3.32	135	0.11535	0.13029
GO:0000979	RNA polymerase II core promoter sequence...	21	1	0.13	126	0.11903	0.12302
GO:0071813	lipoprotein particle binding	21	1	0.13	127	0.11903	0.12302
GO:0071814	protein-lipid complex binding	21	1	0.13	128	0.11903	0.12302
GO:0043027	cysteine-type endopeptidase inhibitor ac...	21	1	0.13	129	0.11903	0.12302
GO:0017111	nucleoside-triphosphatase activity	688	7	4.14	137	0.11946	0.1365
GO:0061135	endopeptidase regulator activity	100	2	0.6	133	0.12143	0.12858
GO:0047485	protein N-terminus binding	100	2	0.6	134	0.12143	0.12858
GO:0008139	nuclear localization sequence binding	22	1	0.13	131	0.12434	0.12849
GO:0070840	dynein complex binding	22	1	0.13	132	0.12434	0.12849
GO:0005504	fatty acid binding	23	1	0.14	136	0.12961	0.13393
GO:0042393	histone binding	210	3	1.26	139	0.13258	0.14293
GO:0003712	transcription coregulator activity	450	5	2.71	144	0.13414	0.14898
GO:0035035	histone acetyltransferase binding	24	1	0.14	138	0.13485	0.13933
GO:0016866	intramolecular transferase activity	25	1	0.15	140	0.14006	0.1447
GO:0030371	translation repressor activity	25	1	0.15	141	0.14006	0.1447
GO:0008266	poly(U) RNA binding	25	1	0.15	142	0.14006	0.1447
GO:0008092	cytoskeletal protein binding	854	8	5.13	148	0.14061	0.16167
GO:0044325	ion channel binding	115	2	0.69	147	0.15205	0.16069
GO:0017069	snRNA binding	43	4	0.26	7	0.15546	0.00014
GO:0043015	gamma-tubulin binding	28	1	0.17	145	0.15551	0.16061
GO:0008187	poly-pyrimidine tract binding	28	1	0.17	146	0.15551	0.16061
GO:0042277	peptide binding	228	3	1.37	151	0.15779	0.16967
GO:0097718	disordered domain specific binding	29	1	0.17	149	0.1606	0.16584
GO:0017046	peptide hormone binding	29	1	0.17	150	0.1606	0.16584
GO:0016799	hydrolase activity hydrolyzing N-glycos…	30	1	0.18	152	0.16565	0.17105
GO:0140142	nucleocytoplasmic carrier activity	30	1	0.18	153	0.16565	0.17105
GO:0003755	peptidyl-prolyl cis-trans isomerase acti...	31	1	0.19	154	0.17068	0.17622
GO:0035198	miRNA binding	31	1	0.19	155	0.17068	0.17622
GO:0008200	ion channel inhibitor activity	32	1	0.19	156	0.17568	0.18136
GO:0042287	MHC protein binding	32	1	0.19	157	0.17568	0.18136
GO:0000217	DNA secondary structure binding	32	1	0.19	158	0.17568	0.18136
GO:0016859	cis-trans isomerase activity	33	1	0.2	160	0.18065	0.18647
GO:0016248	channel inhibitor activity	33	1	0.2	161	0.18065	0.18647
GO:0003713	transcription coactivator activity	244	3	1.47	162	0.18133	0.19457
GO:0008270	zinc ion binding	641	6	3.85	169	0.18783	0.20928
GO:0061134	peptidase regulator activity	132	2	0.79	164	0.18833	0.19861
GO:0016776	phosphotransferase activity phosphate g…	35	1	0.21	163	0.19049	0.1966
GO:0019903	protein phosphatase binding	135	2	0.81	166	0.19486	0.20542
GO:0005246	calcium channel regulator activity	36	1	0.22	165	0.19537	0.20161
GO:0019205	nucleobase-containing compound kinase ac...	37	1	0.22	167	0.20022	0.2066
GO:0019212	phosphatase inhibitor activity	37	1	0.22	168	0.20022	0.2066
GO:0004857	enzyme inhibitor activity	258	3	1.55	175	0.20267	0.21705
GO:0043028	cysteine-type endopeptidase regulator ac...	38	1	0.23	170	0.20504	0.21155
GO:0015036	disulfide oxidoreductase activity	38	1	0.23	171	0.20504	0.21155
GO:0003899	DNA-directed 5'-3' RNA polymerase activi...	39	1	0.23	172	0.20984	0.21648
GO:0030331	estrogen receptor binding	39	1	0.23	173	0.20984	0.21648
GO:0061631	ubiquitin conjugating enzyme activity	39	1	0.23	174	0.20984	0.21648
GO:0016860	intramolecular oxidoreductase activity	41	1	0.25	176	0.21934	0.22623
GO:0061980	regulatory RNA binding	41	1	0.25	177	0.21934	0.22623
GO:0061650	ubiquitin-like protein conjugating enzym...	41	1	0.25	178	0.21934	0.22623
GO:0003729	mRNA binding	269	3	1.62	183	0.21984	0.23509
GO:0031406	carboxylic acid binding	147	2	0.88	182	0.22124	0.23288
GO:0001046	core promoter sequence-specific DNA bind...	42	1	0.25	179	0.22404	0.23106
GO:0034062	5'-3' RNA polymerase activity	42	1	0.25	180	0.22404	0.23106
GO:0097747	RNA polymerase activity	42	1	0.25	181	0.22404	0.23106
GO:0016787	hydrolase activity	1956	17	11.76	102	0.22764	0.09409
GO:0046914	transition metal ion binding	826	7	4.97	192	0.22773	0.25464
GO:0046983	protein dimerization activity	827	7	4.97	193	0.22862	0.2556
GO:0005048	signal sequence binding	43	1	0.26	184	0.22872	0.23587
GO:0098632	cell-cell adhesion mediator activity	43	1	0.26	185	0.22872	0.23587
GO:0005507	copper ion binding	43	1	0.26	186	0.22872	0.23587
GO:0033293	monocarboxylic acid binding	43	1	0.26	187	0.22872	0.23587
GO:0001786	phosphatidylserine binding	44	1	0.26	188	0.23337	0.24064
GO:0005080	protein kinase C binding	45	1	0.27	190	0.238	0.24538
GO:0004721	phosphoprotein phosphatase activity	156	2	0.94	191	0.24121	0.25363
GO:0043177	organic acid binding	158	2	0.95	194	0.24566	0.25825
GO:0098631	cell adhesion mediator activity	51	1	0.31	195	0.26517	0.27324
GO:0004536	deoxyribonuclease activity	52	1	0.31	196	0.2696	0.27778
GO:0042562	hormone binding	52	1	0.31	197	0.2696	0.27778
GO:0003714	transcription corepressor activity	172	2	1.03	198	0.2769	0.29059
GO:0005126	cytokine receptor binding	174	2	1.05	199	0.28136	0.2952
GO:0005253	anion channel activity	56	1	0.34	200	0.28708	0.29567
GO:0097110	scaffold protein binding	56	1	0.34	201	0.28708	0.29567
GO:0016667	oxidoreductase activity acting on a sul…	56	1	0.34	202	0.28708	0.29567
GO:0019902	phosphatase binding	177	2	1.06	203	0.28805	0.30212
GO:0140272	exogenous protein binding	59	1	0.35	204	0.29991	0.3088
GO:0003823	antigen binding	59	1	0.35	205	0.29991	0.3088
GO:0001618	virus receptor activity	59	1	0.35	206	0.29991	0.3088
GO:0000287	magnesium ion binding	183	2	1.1	209	0.30141	0.31591
GO:0030971	receptor tyrosine kinase binding	60	1	0.36	207	0.30414	0.31312
GO:0002039	p53 binding	60	1	0.36	208	0.30414	0.31312
GO:0050839	cell adhesion molecule binding	477	4	2.87	210	0.32256	0.34594
GO:0004896	cytokine receptor activity	69	1	0.41	211	0.34107	0.35084
GO:0035639	purine ribonucleoside triphosphate bindi...	1569	11	9.43	217	0.34178	0.38622
GO:0009055	electron transfer activity	92	3	0.55	45	0.34271	0.01968
GO:0019208	phosphatase regulator activity	86	3	0.52	41	0.35411	0.01647
GO:0003678	DNA helicase activity	73	1	0.44	212	0.35685	0.36694
GO:0035258	steroid hormone receptor binding	74	1	0.44	213	0.36074	0.3709
GO:0030165	PDZ domain binding	75	1	0.45	214	0.3646	0.37484
GO:0020037	heme binding	75	1	0.45	215	0.3646	0.37484
GO:0090079	translation regulator activity nucleic …	95	3	0.57	47	0.36934	0.02141
GO:0004252	serine-type endopeptidase activity	77	1	0.46	216	0.37226	0.38264
GO:0003727	single-stranded RNA binding	79	1	0.47	218	0.37983	0.39035
GO:0032555	purine ribonucleotide binding	1622	11	9.75	222	0.38371	0.43017
GO:0032553	ribonucleotide binding	1634	11	9.82	228	0.39331	0.44014
GO:0017076	purine nucleotide binding	1635	11	9.83	230	0.39411	0.44097
GO:0046906	tetrapyrrole binding	83	1	0.5	220	0.39469	0.40548
GO:1990782	protein tyrosine kinase binding	84	1	0.51	221	0.39835	0.40921
GO:0019899	enzyme binding	2003	22	12.04	19	0.4115	0.0048
GO:0016791	phosphatase activity	237	2	1.42	224	0.41842	0.43592

## Sheet: NKT
Supplementary Table 4. T cell recluster GO results -- NKT
GO.ID	Term	Annotated	Significant	Expected	Rank in Fisher.classic	Fisher.elim	Fisher.classic
GO:0051301	cell division	542	18	3.65	4	1.7e-08	4.1e-08
GO:0043922	negative regulation by host of viral tra...	13	3	0.09	88	8.1e-05	9.4e-05
GO:0000398	mRNA splicing via spliceosome	337	10	2.27	100	8.8e-05	0.00014
GO:0006266	DNA ligation	17	3	0.11	114	0.00019	0.00022
GO:0051384	response to glucocorticoid	102	7	0.69	38	0.00032	7.8e-06
GO:0043388	positive regulation of DNA binding	50	4	0.34	142	0.00035	0.00043
GO:0006357	regulation of transcription by RNA polym...	2071	27	13.95	185	0.00038	0.00095
GO:0071345	cellular response to cytokine stimulus	905	18	6.1	74	0.00056	5.9e-05
GO:0042493	response to drug	298	8	2.01	206	0.00089	0.00126
GO:0006298	mismatch repair	29	3	0.2	198	0.00095	0.00111
GO:0032735	positive regulation of interleukin-12 pr...	30	3	0.2	200	0.00105	0.00123
GO:0071276	cellular response to cadmium ion	30	3	0.2	201	0.00105	0.00123
GO:0045132	meiotic chromosome segregation	67	4	0.45	209	0.00107	0.0013
GO:0006310	DNA recombination	259	9	1.74	86	0.00119	9.2e-05
GO:0042542	response to hydrogen peroxide	118	5	0.79	216	0.00119	0.00151
GO:0009636	response to toxic substance	190	8	1.28	75	0.00121	6.1e-05
GO:0044772	mitotic cell cycle phase transition	531	14	3.58	56	0.0013	2.2e-05
GO:0034622	cellular protein-containing complex asse...	952	15	6.41	272	0.00165	0.00281
GO:0050850	positive regulation of calcium-mediated ...	35	3	0.24	231	0.00166	0.00193
GO:0045070	positive regulation of viral genome repl...	36	3	0.24	237	0.0018	0.00209
GO:0061687	detoxification of inorganic compound	10	2	0.07	239	0.00195	0.00216
GO:0009162	deoxyribonucleoside monophosphate metabo...	10	2	0.07	240	0.00195	0.00216
GO:0045876	positive regulation of sister chromatid ...	10	2	0.07	241	0.00195	0.00216
GO:0010649	regulation of cell communication by elec...	10	2	0.07	242	0.00195	0.00216
GO:0032070	regulation of deoxyribonuclease activity	10	2	0.07	243	0.00195	0.00216
GO:0051280	negative regulation of release of seques...	10	2	0.07	244	0.00195	0.00216
GO:0031145	anaphase-promoting complex-dependent cat...	80	4	0.54	259	0.00206	0.0025
GO:0006338	chromatin remodeling	196	6	1.32	271	0.00207	0.00271
GO:0009409	response to cold	38	3	0.26	255	0.0021	0.00245
GO:0045744	negative regulation of G protein-coupled...	38	3	0.26	256	0.0021	0.00245
GO:0051338	regulation of transferase activity	878	14	5.91	296	0.00214	0.00352
GO:1902850	microtubule cytoskeleton organization in...	137	5	0.92	275	0.00231	0.00291
GO:0070234	positive regulation of T cell apoptotic ...	11	2	0.07	262	0.00237	0.00263
GO:0010958	regulation of amino acid import across p...	11	2	0.07	263	0.00237	0.00263
GO:0005513	detection of calcium ion	11	2	0.07	264	0.00237	0.00263
GO:0097501	stress response to metal ion	11	2	0.07	265	0.00237	0.00263
GO:0019042	viral latency	11	2	0.07	266	0.00237	0.00263
GO:0072677	eosinophil migration	11	2	0.07	267	0.00237	0.00263
GO:1903706	regulation of hemopoiesis	429	9	2.89	293	0.00237	0.0034
GO:0007127	meiosis I	85	4	0.57	280	0.00257	0.00312
GO:0050918	positive chemotaxis	42	3	0.28	290	0.00281	0.00326
GO:0060213	positive regulation of nuclear-transcrib...	12	2	0.08	281	0.00283	0.00314
GO:0002837	regulation of immune response to tumor c...	12	2	0.08	282	0.00283	0.00314
GO:0009265	2'-deoxyribonucleotide biosynthetic proc...	12	2	0.08	283	0.00283	0.00314
GO:0060576	intestinal epithelial cell development	12	2	0.08	284	0.00283	0.00314
GO:0051412	response to corticosterone	12	2	0.08	285	0.00283	0.00314
GO:0051345	positive regulation of hydrolase activit...	650	13	4.38	165	0.00285	0.00067
GO:0016032	viral process	847	19	5.7	37	0.00296	6.5e-06
GO:0019674	NAD metabolic process	43	3	0.29	294	0.003	0.00349
GO:0051148	negative regulation of muscle cell diffe...	43	3	0.29	295	0.003	0.00349
GO:0000723	telomere maintenance	146	5	0.98	302	0.00304	0.00382
GO:0031323	regulation of cellular metabolic process	5141	62	34.62	9	0.00318	1.3e-07
GO:0000226	microtubule cytoskeleton organization	521	13	3.51	82	0.00325	7.7e-05
GO:0071346	cellular response to interferon-gamma	149	5	1	309	0.00332	0.00416
GO:0019221	cytokine-mediated signaling pathway	630	11	4.24	339	0.00332	0.00499
GO:0033151	V(D)J recombination	13	2	0.09	299	0.00333	0.0037
GO:0090026	positive regulation of monocyte chemotax...	13	2	0.09	300	0.00333	0.0037
GO:0007346	regulation of mitotic cell cycle	578	17	3.89	17	0.00344	5.7e-07
GO:0043488	regulation of mRNA stability	172	7	1.16	115	0.00359	0.00022
GO:0071897	DNA biosynthetic process	168	8	1.13	59	0.0036	2.5e-05
GO:0071222	cellular response to lipopolysaccharide	152	5	1.02	328	0.00361	0.00453
GO:0042267	natural killer cell mediated cytotoxicit...	47	3	0.32	326	0.00387	0.00449
GO:0009130	pyrimidine nucleoside monophosphate bios...	14	2	0.09	315	0.00387	0.0043
GO:0035278	miRNA mediated inhibition of translation	14	2	0.09	316	0.00387	0.0043
GO:0090266	regulation of mitotic cell cycle spindle...	14	2	0.09	317	0.00387	0.0043
GO:0060135	maternal process involved in female preg...	48	3	0.32	332	0.00411	0.00476
GO:0045840	positive regulation of mitotic nuclear d...	48	3	0.32	333	0.00411	0.00476
GO:0051928	positive regulation of calcium ion trans...	97	4	0.65	340	0.00414	0.005
GO:0009628	response to abiotic stimulus	1015	17	6.84	172	0.00423	0.00073
GO:0071824	protein-DNA complex subunit organization	228	6	1.54	358	0.00438	0.00567
GO:0007059	chromosome segregation	291	14	1.96	3	0.00438	1.7e-08
GO:0016458	gene silencing	247	8	1.66	136	0.00439	0.00037
GO:0070233	negative regulation of T cell apoptotic ...	15	2	0.1	335	0.00445	0.00493
GO:2000278	regulation of DNA biosynthetic process	99	4	0.67	347	0.00446	0.00538
GO:0007076	mitotic chromosome condensation	16	2	0.11	352	0.00506	0.00561
GO:0071294	cellular response to zinc ion	16	2	0.11	353	0.00506	0.00561
GO:0010517	regulation of phospholipase activity	52	3	0.35	360	0.00515	0.00596
GO:0042981	regulation of apoptotic process	1246	19	8.39	197	0.00527	0.00108
GO:0045454	cell redox homeostasis	53	3	0.36	365	0.00543	0.00629
GO:0045814	negative regulation of gene expression …	105	4	0.71	376	0.00549	0.00661
GO:0006302	double-strand break repair	240	6	1.62	386	0.00561	0.00723
GO:0006123	mitochondrial electron transport cytoch…	17	2	0.11	366	0.00571	0.00633
GO:0009200	deoxyribonucleoside triphosphate metabol...	17	2	0.11	367	0.00571	0.00633
GO:0010881	regulation of cardiac muscle contraction...	17	2	0.11	368	0.00571	0.00633
GO:0010801	negative regulation of peptidyl-threonin...	17	2	0.11	369	0.00571	0.00633
GO:0071280	cellular response to copper ion	17	2	0.11	370	0.00571	0.00633
GO:0070935	3'-UTR-mediated mRNA stabilization	17	2	0.11	371	0.00571	0.00633
GO:0045089	positive regulation of innate immune res...	170	5	1.14	385	0.00579	0.00723
GO:0051592	response to calcium ion	120	6	0.81	112	0.00581	0.00021
GO:0032392	DNA geometric change	107	4	0.72	379	0.00587	0.00706
GO:0009219	pyrimidine deoxyribonucleotide metabolic...	18	2	0.12	381	0.0064	0.00709
GO:0140131	positive regulation of lymphocyte chemot...	18	2	0.12	382	0.0064	0.00709
GO:0031325	positive regulation of cellular metaboli...	2738	34	18.44	139	0.00646	0.00039
GO:2000816	negative regulation of mitotic sister ch...	37	5	0.25	35	0.00646	5.9e-06
GO:0010941	regulation of cell death	1373	23	9.25	79	0.0066	7e-05
GO:0030101	natural killer cell activation	57	3	0.38	388	0.00665	0.0077
GO:0031100	animal organ regeneration	57	3	0.38	389	0.00665	0.0077
GO:0017148	negative regulation of translation	129	6	0.87	123	0.00701	0.00031
GO:0042276	error-prone translesion synthesis	19	2	0.13	391	0.00712	0.00789
GO:0032516	positive regulation of phosphoprotein ph...	19	2	0.13	392	0.00712	0.00789
GO:0042119	neutrophil activation	418	8	2.82	421	0.00712	0.0097
GO:0044092	negative regulation of molecular functio...	901	13	6.07	435	0.00716	0.01106
GO:0006260	DNA replication	254	6	1.71	414	0.00734	0.00942
GO:1903902	positive regulation of viral life cycle	56	5	0.38	69	0.00743	4.7e-05
GO:0050658	RNA transport	186	7	1.25	133	0.00762	0.00035
GO:0086064	cell communication by electrical couplin...	20	2	0.13	402	0.00788	0.00872
GO:0009147	pyrimidine nucleoside triphosphate metab...	20	2	0.13	403	0.00788	0.00872
GO:0006297	nucleotide-excision repair DNA gap fill…	20	2	0.13	404	0.00788	0.00872
GO:0002407	dendritic cell chemotaxis	20	2	0.13	405	0.00788	0.00872
GO:0060314	regulation of ryanodine-sensitive calciu...	20	2	0.13	406	0.00788	0.00872
GO:0097549	chromatin organization involved in negat...	119	4	0.8	426	0.00849	0.01019
GO:1901698	response to nitrogen compound	906	15	6.1	224	0.00849	0.00174
GO:0006309	apoptotic DNA fragmentation	21	2	0.14	416	0.00867	0.0096
GO:0051383	kinetochore organization	21	2	0.14	417	0.00867	0.0096
GO:0070987	error-free translesion synthesis	21	2	0.14	418	0.00867	0.0096
GO:0033044	regulation of chromosome organization	329	12	2.22	31	0.00898	3.6e-06
GO:0045841	negative regulation of mitotic metaphase...	36	4	0.24	94	0.00912	0.00012
GO:0045727	positive regulation of translation	122	4	0.82	437	0.00925	0.01109
GO:0051591	response to cAMP	65	3	0.44	432	0.00956	0.01103
GO:0080090	regulation of primary metabolic process	4944	60	33.3	11	0.00968	2.3e-07
GO:0071426	ribonucleoprotein complex export from nu...	124	4	0.84	445	0.00978	0.01172
GO:0009141	nucleoside triphosphate metabolic proces...	98	5	0.66	164	0.00984	0.00066
GO:1904666	regulation of ubiquitin protein ligase a...	23	2	0.15	439	0.01035	0.01146
GO:0061621	canonical glycolysis	23	2	0.15	440	0.01035	0.01146
GO:0034110	regulation of homotypic cell-cell adhesi...	23	2	0.15	441	0.01035	0.01146
GO:0006735	NADH regeneration	23	2	0.15	442	0.01035	0.01146
GO:0061718	glucose catabolic process to pyruvate	23	2	0.15	443	0.01035	0.01146
GO:0065004	protein-DNA complex assembly	197	5	1.33	466	0.0106	0.01312
GO:0034767	positive regulation of ion transmembrane...	127	4	0.86	463	0.01061	0.01271
GO:1990868	response to chemokine	68	3	0.46	459	0.01081	0.01247
GO:1990869	cellular response to chemokine	68	3	0.46	460	0.01081	0.01247
GO:0000724	double-strand break repair via homologou...	128	4	0.86	465	0.0109	0.01305
GO:0061620	glycolytic process through glucose-6-pho...	24	2	0.16	453	0.01125	0.01244
GO:0031954	positive regulation of protein autophosp...	24	2	0.16	454	0.01125	0.01244
GO:0043457	regulation of cellular respiration	24	2	0.16	455	0.01125	0.01244
GO:0022616	DNA strand elongation	24	2	0.16	456	0.01125	0.01244
GO:0000725	recombinational repair	130	4	0.88	478	0.01149	0.01374
GO:0009205	purine ribonucleoside triphosphate metab...	70	3	0.47	475	0.01169	0.01348
GO:0071277	cellular response to calcium ion	70	3	0.47	476	0.01169	0.01348
GO:0009314	response to radiation	367	7	2.47	496	0.01186	0.01554
GO:0050863	regulation of T cell activation	282	6	1.9	492	0.01191	0.01517
GO:0045652	regulation of megakaryocyte differentiat...	71	3	0.48	480	0.01215	0.014
GO:0061615	glycolytic process through fructose-6-ph...	25	2	0.17	470	0.01217	0.01346
GO:0015949	nucleobase-containing small molecule int...	25	2	0.17	471	0.01217	0.01346
GO:0010800	positive regulation of peptidyl-threonin...	25	2	0.17	472	0.01217	0.01346
GO:0097421	liver regeneration	25	2	0.17	473	0.01217	0.01346
GO:0002262	myeloid cell homeostasis	134	4	0.9	493	0.01273	0.01521
GO:0009142	nucleoside triphosphate biosynthetic pro...	73	3	0.49	491	0.01309	0.01509
GO:0001975	response to amphetamine	26	2	0.18	485	0.01313	0.01452
GO:0032201	telomere maintenance via semi-conservati...	26	2	0.18	486	0.01313	0.01452
GO:0060548	negative regulation of cell death	801	13	5.39	314	0.0141	0.00426
GO:1901020	negative regulation of calcium ion trans...	27	2	0.18	498	0.01412	0.01561
GO:0050849	negative regulation of calcium-mediated ...	27	2	0.18	499	0.01412	0.01561
GO:0051154	negative regulation of striated muscle c...	27	2	0.18	500	0.01412	0.01561
GO:0009891	positive regulation of biosynthetic proc...	1610	21	10.84	306	0.01434	0.00398
GO:0009199	ribonucleoside triphosphate metabolic pr...	76	3	0.51	509	0.01459	0.01679
GO:0052548	regulation of endopeptidase activity	296	6	1.99	524	0.01483	0.0188
GO:0034614	cellular response to reactive oxygen spe...	141	4	0.95	522	0.0151	0.018
GO:0006882	cellular zinc ion homeostasis	28	2	0.19	504	0.01514	0.01673
GO:0051281	positive regulation of release of seques...	28	2	0.19	505	0.01514	0.01673
GO:0051129	negative regulation of cellular componen...	644	14	4.34	106	0.01521	0.00017
GO:0001666	response to hypoxia	298	6	2.01	535	0.01528	0.01937
GO:0007093	mitotic cell cycle checkpoint	159	6	1.07	184	0.01545	0.00093
GO:0051028	mRNA transport	142	4	0.96	523	0.01546	0.01843
GO:0009144	purine nucleoside triphosphate metabolic...	78	3	0.53	519	0.01564	0.01799
GO:1903426	regulation of reactive oxygen species bi...	78	3	0.53	520	0.01564	0.01799
GO:0043467	regulation of generation of precursor me...	143	4	0.96	525	0.01582	0.01886
GO:0045637	regulation of myeloid cell differentiati...	218	5	1.47	536	0.01585	0.0195
GO:0045737	positive regulation of cyclin-dependent ...	29	2	0.2	516	0.01619	0.01789
GO:0006221	pyrimidine nucleotide biosynthetic proce...	29	2	0.2	517	0.01619	0.01789
GO:0048872	homeostasis of number of cells	220	5	1.48	538	0.01643	0.0202
GO:0033554	cellular response to stress	1854	25	12.49	187	0.01713	0.00095
GO:0098926	postsynaptic signal transduction	30	2	0.2	526	0.01727	0.01908
GO:0001893	maternal placenta development	30	2	0.2	527	0.01727	0.01908
GO:0032733	positive regulation of interleukin-10 pr...	30	2	0.2	528	0.01727	0.01908
GO:0055069	zinc ion homeostasis	30	2	0.2	529	0.01727	0.01908
GO:0006007	glucose catabolic process	30	2	0.2	530	0.01727	0.01908
GO:0002548	monocyte chemotaxis	44	4	0.3	120	0.01767	0.00026
GO:0043044	ATP-dependent chromatin remodeling	82	3	0.55	543	0.01786	0.02052
GO:0051347	positive regulation of transferase activ...	592	9	3.99	573	0.01808	0.02464
GO:0002366	leukocyte activation involved in immune ...	592	9	3.99	574	0.01808	0.02464
GO:0036293	response to decreased oxygen levels	310	6	2.09	563	0.01821	0.023
GO:0046683	response to organophosphorus	97	5	0.65	162	0.01851	0.00063
GO:0002263	cell activation involved in immune respo...	596	9	4.01	584	0.0188	0.02559
GO:0002456	T cell mediated immunity	84	3	0.57	551	0.01903	0.02186
GO:0000910	cytokinesis	152	4	1.02	564	0.01935	0.023
GO:0002285	lymphocyte activation involved in immune...	152	4	1.02	565	0.01935	0.023
GO:0042110	T cell activation	405	7	2.73	577	0.01939	0.02511
GO:0000083	regulation of transcription involved in ...	32	2	0.22	548	0.01952	0.02156
GO:0040001	establishment of mitotic spindle localiz...	32	2	0.22	549	0.01952	0.02156
GO:0043312	neutrophil degranulation	406	7	2.73	578	0.01962	0.02541
GO:0010604	positive regulation of macromolecule met...	2865	36	19.3	108	0.01969	0.00019
GO:0030219	megakaryocyte differentiation	86	3	0.58	566	0.02024	0.02324
GO:0002283	neutrophil activation involved in immune...	409	7	2.75	587	0.02034	0.02631
GO:0052547	regulation of peptidase activity	318	6	2.14	585	0.02036	0.02566
GO:1904031	positive regulation of cyclin-dependent ...	33	2	0.22	557	0.02069	0.02284
GO:2000279	negative regulation of DNA biosynthetic ...	33	2	0.22	558	0.02069	0.02284
GO:0042769	DNA damage response detection of DNA da…	33	2	0.22	559	0.02069	0.02284
GO:0032414	positive regulation of ion transmembrane...	88	3	0.59	575	0.0215	0.02467
GO:0006296	nucleotide-excision repair DNA incision…	34	2	0.23	567	0.02189	0.02416
GO:0003723	RNA binding	1537	39	10.23	1	2.5e-09	1.9e-13
GO:0005515	protein binding	10921	93	72.7	5	8.2e-08	1.7e-05
GO:0003682	chromatin binding	512	18	3.41	2	3.5e-07	1.7e-08
GO:0003697	single-stranded DNA binding	107	7	0.71	4	7e-06	1.1e-05
GO:0008301	DNA binding bending	11	3	0.07	6	4.5e-05	5.5e-05
GO:0043539	protein serine/threonine kinase activato...	32	4	0.21	8	5.7e-05	7.3e-05
GO:0042056	chemoattractant activity	20	3	0.13	13	0.0003	0.00036
GO:0042802	identical protein binding	1587	22	10.56	16	0.00059	0.00144
GO:0003684	damaged DNA binding	62	4	0.41	15	0.00076	0.00097
GO:0003725	double-stranded RNA binding	70	4	0.47	17	0.00121	0.00152
GO:0008022	protein C-terminus binding	179	6	1.19	18	0.00123	0.0017
GO:0005200	structural constituent of cytoskeleton	73	4	0.49	19	0.00141	0.00178
GO:0008144	drug binding	76	4	0.51	20	0.00164	0.00206
GO:0031492	nucleosomal DNA binding	36	3	0.24	21	0.00174	0.00208
GO:0003730	mRNA 3'-UTR binding	82	4	0.55	23	0.00217	0.00272
GO:0008179	adenylate cyclase binding	11	2	0.07	22	0.00232	0.00262
GO:0003924	GTPase activity	281	7	1.87	26	0.00268	0.00381
GO:0072542	protein phosphatase activator activity	12	2	0.08	24	0.00277	0.00313
GO:0015037	peptide disulfide oxidoreductase activit...	13	2	0.09	25	0.00326	0.00368
GO:0032182	ubiquitin-like protein binding	94	4	0.63	28	0.00355	0.00444
GO:0045296	cadherin binding	304	7	2.02	32	0.00414	0.00583
GO:0023026	MHC class II protein complex binding	16	2	0.11	30	0.00495	0.00559
GO:0042826	histone deacetylase binding	104	4	0.69	36	0.0051	0.00635
GO:0000400	four-way junction DNA binding	17	2	0.11	35	0.00559	0.00631
GO:0015631	tubulin binding	330	7	2.2	40	0.00644	0.00898
GO:0070182	DNA polymerase binding	19	2	0.13	37	0.00696	0.00786
GO:0001530	lipopolysaccharide binding	19	2	0.13	38	0.00696	0.00786
GO:0003729	mRNA binding	269	9	1.79	11	0.007	0.00012
GO:0000979	RNA polymerase II core promoter sequence...	21	2	0.14	41	0.00848	0.00956
GO:0004129	cytochrome-c oxidase activity	21	2	0.14	42	0.00848	0.00956
GO:0005125	cytokine activity	121	4	0.81	46	0.00865	0.01072
GO:0019956	chemokine binding	25	2	0.17	49	0.01191	0.01341
GO:0016853	isomerase activity	133	4	0.89	51	0.01194	0.01474
GO:0019900	kinase binding	671	10	4.47	62	0.01362	0.02038
GO:0048020	CCR chemokine receptor binding	27	2	0.18	55	0.01381	0.01555
GO:0043130	ubiquitin binding	76	3	0.51	56	0.01415	0.01671
GO:0097718	disordered domain specific binding	29	2	0.19	57	0.01584	0.01782
GO:0140142	nucleocytoplasmic carrier activity	30	2	0.2	58	0.0169	0.01901
GO:0008009	chemokine activity	30	2	0.2	59	0.0169	0.01901
GO:0019901	protein kinase binding	592	9	3.94	69	0.01691	0.02441
GO:0035198	miRNA binding	31	2	0.21	61	0.01798	0.02023
GO:0005525	GTP binding	324	6	2.16	70	0.02101	0.02757
GO:0046983	protein dimerization activity	827	11	5.51	77	0.02121	0.03197
GO:0004869	cysteine-type endopeptidase inhibitor ac...	34	2	0.23	66	0.02142	0.02407
GO:0008536	Ran GTPase binding	34	2	0.23	67	0.02142	0.02407
GO:0042162	telomeric DNA binding	34	2	0.23	68	0.02142	0.02407
GO:0032550	purine ribonucleoside binding	328	6	2.18	71	0.02216	0.02904
GO:0032549	ribonucleoside binding	331	6	2.2	74	0.02305	0.03018
GO:0001883	purine nucleoside binding	331	6	2.2	75	0.02305	0.03018
GO:0001882	nucleoside binding	336	6	2.24	78	0.02459	0.03214
GO:0019001	guanyl nucleotide binding	339	6	2.26	79	0.02555	0.03335
GO:0032561	guanyl ribonucleotide binding	339	6	2.26	80	0.02555	0.03335
GO:0019904	protein domain specific binding	637	9	4.24	84	0.02576	0.03659
GO:0042379	chemokine receptor binding	39	2	0.26	76	0.02769	0.03108
GO:0047485	protein N-terminus binding	100	3	0.67	81	0.02905	0.03406
GO:0061980	regulatory RNA binding	41	2	0.27	82	0.03038	0.03408
GO:0046982	protein heterodimerization activity	264	5	1.76	88	0.03144	0.03956
GO:0005507	copper ion binding	43	2	0.29	85	0.03318	0.03719
GO:0005048	signal sequence binding	43	2	0.29	86	0.03318	0.03719
GO:0000287	magnesium ion binding	183	4	1.22	91	0.0338	0.04106
GO:0016538	cyclin-dependent protein serine/threonin...	45	2	0.3	90	0.03606	0.0404
GO:0001228	DNA-binding transcription activator acti...	371	6	2.47	93	0.03729	0.04817
GO:0001216	DNA-binding transcription activator acti...	374	6	2.49	96	0.03855	0.04973
GO:0044325	ion channel binding	115	3	0.77	94	0.04134	0.04825
GO:0033218	amide binding	289	5	1.92	100	0.04366	0.0545
GO:0001664	G protein-coupled receptor binding	199	4	1.32	98	0.04379	0.05293
GO:0042562	hormone binding	52	2	0.35	97	0.04689	0.05243
GO:1990841	promoter-specific chromatin binding	53	2	0.35	99	0.04852	0.05424
GO:0042393	histone binding	210	4	1.4	103	0.05152	0.06207
GO:0032404	mismatch repair complex binding	10	1	0.07	104	0.06463	0.06867
GO:0019855	calcium channel inhibitor activity	10	1	0.07	105	0.06463	0.06867
GO:0098505	G-rich strand telomeric DNA binding	10	1	0.07	106	0.06463	0.06867
GO:0042277	peptide binding	228	4	1.52	118	0.06569	0.07869
GO:0030234	enzyme regulator activity	837	13	5.57	34	0.06733	0.00606
GO:0042803	protein homodimerization activity	541	7	3.6	130	0.0688	0.08923
GO:0016209	antioxidant activity	65	2	0.43	117	0.06961	0.07757
GO:0060229	lipase activator activity	11	1	0.07	107	0.07086	0.07527
GO:0005049	nuclear export signal receptor activity	11	1	0.07	108	0.07086	0.07527
GO:0030955	potassium ion binding	11	1	0.07	109	0.07086	0.07527
GO:0035256	G protein-coupled glutamate receptor bin...	11	1	0.07	110	0.07086	0.07527
GO:0005212	structural constituent of eye lens	11	1	0.07	111	0.07086	0.07527
GO:0001972	retinoic acid binding	11	1	0.07	112	0.07086	0.07527
GO:0017017	MAP kinase tyrosine/serine/threonine pho...	11	1	0.07	113	0.07086	0.07527
GO:1990825	sequence-specific mRNA binding	11	1	0.07	114	0.07086	0.07527
GO:0016004	phospholipase activator activity	11	1	0.07	115	0.07086	0.07527
GO:0016668	oxidoreductase activity acting on a sul…	11	1	0.07	116	0.07086	0.07527
GO:0019003	GDP binding	66	2	0.44	119	0.07149	0.07963
GO:0008134	transcription factor binding	553	7	3.68	140	0.0754	0.0974
GO:0008017	microtubule binding	240	4	1.6	131	0.07616	0.0909
GO:0097157	pre-mRNA intronic binding	12	1	0.08	120	0.07705	0.08183
GO:0043047	single-stranded telomeric DNA binding	12	1	0.08	121	0.07705	0.08183
GO:0033549	MAP kinase phosphatase activity	12	1	0.08	122	0.07705	0.08183
GO:0005501	retinoid binding	13	1	0.09	125	0.0832	0.08834
GO:0030983	mismatched DNA binding	13	1	0.09	126	0.0832	0.08834
GO:0050998	nitric-oxide synthase binding	13	1	0.09	127	0.0832	0.08834
GO:0034185	apolipoprotein binding	13	1	0.09	128	0.0832	0.08834
GO:0019104	DNA N-glycosylase activity	13	1	0.09	129	0.0832	0.08834
GO:0043565	sequence-specific DNA binding	1337	15	8.9	95	0.08486	0.04909
GO:0072341	modified amino acid binding	73	2	0.49	133	0.08504	0.09456
GO:0044548	S100 protein binding	14	1	0.09	134	0.08931	0.09481
GO:0005324	long-chain fatty acid transporter activi...	14	1	0.09	135	0.08931	0.09481
GO:0017070	U6 snRNA binding	14	1	0.09	136	0.08931	0.09481
GO:0098847	sequence-specific single stranded DNA bi...	14	1	0.09	137	0.08931	0.09481
GO:0030296	protein tyrosine kinase activator activi...	14	1	0.09	138	0.08931	0.09481
GO:0019840	isoprenoid binding	14	1	0.09	139	0.08931	0.09481
GO:0032183	SUMO binding	15	1	0.1	141	0.09537	0.10123
GO:0035615	clathrin adaptor activity	15	1	0.1	142	0.09537	0.10123
GO:0005521	lamin binding	15	1	0.1	143	0.09537	0.10123
GO:0000900	translation repressor activity mRNA reg…	15	1	0.1	144	0.09537	0.10123
GO:0031420	alkali metal ion binding	15	1	0.1	145	0.09537	0.10123
GO:0000166	nucleotide binding	1834	17	12.21	186	0.09673	0.1479
GO:1901265	nucleoside phosphate binding	1835	17	12.21	187	0.0971	0.14841
GO:0031683	G-protein beta/gamma-subunit complex bin...	16	1	0.11	146	0.1014	0.1076
GO:0030247	polysaccharide binding	16	1	0.11	147	0.1014	0.1076
GO:0140312	cargo adaptor activity	16	1	0.11	148	0.1014	0.1076
GO:0005092	GDP-dissociation inhibitor activity	16	1	0.11	149	0.1014	0.1076
GO:0031489	myosin V binding	16	1	0.11	150	0.1014	0.1076
GO:0019899	enzyme binding	2003	24	13.33	33	0.10437	0.00589
GO:0003746	translation elongation factor activity	17	1	0.11	151	0.10739	0.11393
GO:0019957	C-C chemokine binding	17	1	0.11	152	0.10739	0.11393
GO:0016864	intramolecular oxidoreductase activity …	17	1	0.11	153	0.10739	0.11393
GO:0050750	low-density lipoprotein particle recepto...	17	1	0.11	154	0.10739	0.11393
GO:0003756	protein disulfide isomerase activity	17	1	0.11	155	0.10739	0.11393
GO:0005126	cytokine receptor binding	174	3	1.16	159	0.10987	0.12606
GO:0044877	protein-containing complex binding	1078	15	7.18	39	0.11249	0.0087
GO:0042605	peptide antigen binding	18	1	0.12	157	0.11334	0.12022
GO:0070034	telomerase RNA binding	18	1	0.12	158	0.11334	0.12022
GO:0008047	enzyme activator activity	446	9	2.97	27	0.11723	0.00435
GO:0061608	nuclear import signal receptor activity	19	1	0.13	160	0.11925	0.12646
GO:0048019	receptor antagonist activity	19	1	0.13	161	0.11925	0.12646
GO:0042288	MHC class I protein binding	19	1	0.13	162	0.11925	0.12646
GO:0140097	catalytic activity acting on DNA	184	3	1.22	179	0.12422	0.14212
GO:0120014	phospholipid transfer activity	20	1	0.13	164	0.12512	0.13266
GO:0070412	R-SMAD binding	20	1	0.13	165	0.12512	0.13266
GO:0008327	methyl-CpG binding	20	1	0.13	166	0.12512	0.13266
GO:0070325	lipoprotein particle receptor binding	20	1	0.13	167	0.12512	0.13266
GO:0015035	protein disulfide oxidoreductase activit...	20	1	0.13	168	0.12512	0.13266
GO:0004435	phosphatidylinositol phospholipase C act...	20	1	0.13	169	0.12512	0.13266
GO:0004866	endopeptidase inhibitor activity	92	2	0.61	170	0.12514	0.13845
GO:0005319	lipid transporter activity	93	2	0.62	177	0.12736	0.14087
GO:0030414	peptidase inhibitor activity	93	2	0.62	178	0.12736	0.14087
GO:0051087	chaperone binding	94	2	0.63	180	0.12959	0.1433
GO:0071813	lipoprotein particle binding	21	1	0.14	172	0.13095	0.13881
GO:0071814	protein-lipid complex binding	21	1	0.14	173	0.13095	0.13881
GO:0004629	phospholipase C activity	21	1	0.14	174	0.13095	0.13881
GO:0043027	cysteine-type endopeptidase inhibitor ac...	21	1	0.14	175	0.13095	0.13881
GO:0001965	G-protein alpha-subunit binding	21	1	0.14	176	0.13095	0.13881
GO:0090079	translation regulator activity nucleic …	95	2	0.63	185	0.13183	0.14574
GO:0008168	methyltransferase activity	192	3	1.28	192	0.13616	0.15543
GO:0019955	cytokine binding	97	2	0.65	188	0.13633	0.15065
GO:0043236	laminin binding	22	1	0.15	181	0.13675	0.14493
GO:0070840	dynein complex binding	22	1	0.15	182	0.13675	0.14493
GO:0003688	DNA replication origin binding	22	1	0.15	183	0.13675	0.14493
GO:0008139	nuclear localization sequence binding	22	1	0.15	184	0.13675	0.14493
GO:0003690	double-stranded DNA binding	1323	14	8.81	123	0.13942	0.08299
GO:0051082	unfolded protein binding	99	2	0.66	193	0.14087	0.15558
GO:0044389	ubiquitin-like protein ligase binding	301	4	2	200	0.14094	0.16519
GO:0005504	fatty acid binding	23	1	0.15	189	0.1425	0.15099
GO:0001671	ATPase activator activity	23	1	0.15	190	0.1425	0.15099
GO:0061135	endopeptidase regulator activity	100	2	0.67	195	0.14316	0.15806
GO:0060589	nucleoside-triphosphatase regulator acti...	305	4	2.03	205	0.14579	0.17068
GO:0036094	small molecule binding	2090	18	13.91	220	0.14793	0.21926
GO:0035035	histone acetyltransferase binding	24	1	0.16	194	0.14822	0.15702
GO:0016741	transferase activity transferring one-c…	201	3	1.34	206	0.15005	0.17086
GO:0008266	poly(U) RNA binding	25	1	0.17	196	0.1539	0.163
GO:0016866	intramolecular transferase activity	25	1	0.17	197	0.1539	0.163
GO:0035925	mRNA 3'-UTR AU-rich region binding	25	1	0.17	198	0.1539	0.163
GO:0030371	translation repressor activity	25	1	0.17	199	0.1539	0.163
GO:0035639	purine ribonucleoside triphosphate bindi...	1569	14	10.44	219	0.15649	0.21811
GO:0000987	cis-regulatory region sequence-specific ...	918	9	6.11	213	0.15673	0.20218
GO:0003677	DNA binding	2021	27	13.45	14	0.15792	0.00064
GO:0043548	phosphatidylinositol 3-kinase binding	26	1	0.17	201	0.15954	0.16895
GO:0017091	AU-rich element binding	26	1	0.17	202	0.15954	0.16895
GO:0048027	mRNA 5'-UTR binding	26	1	0.17	203	0.15954	0.16895
GO:0030547	receptor inhibitor activity	26	1	0.17	204	0.15954	0.16895
GO:0071889	14-3-3 protein binding	28	1	0.19	207	0.17071	0.1807
GO:0005164	tumor necrosis factor receptor binding	28	1	0.19	208	0.17071	0.1807
GO:0008187	poly-pyrimidine tract binding	28	1	0.19	209	0.17071	0.1807
GO:0017046	peptide hormone binding	29	1	0.19	210	0.17625	0.18652
GO:0016799	hydrolase activity hydrolyzing N-glycos…	30	1	0.2	211	0.18174	0.1923
GO:0032555	purine ribonucleotide binding	1622	14	10.8	241	0.18711	0.25604
GO:0051019	mitogen-activated protein kinase binding	31	1	0.21	212	0.1872	0.19803
GO:0008200	ion channel inhibitor activity	32	1	0.21	214	0.19262	0.20373
GO:0042287	MHC protein binding	32	1	0.21	215	0.19262	0.20373
GO:0032553	ribonucleotide binding	1634	14	10.88	250	0.19443	0.26497
GO:0045182	translation regulator activity	122	2	0.81	217	0.19503	0.21415
GO:0017076	purine nucleotide binding	1635	14	10.88	251	0.19505	0.26572
GO:0030295	protein kinase activator activity	66	5	0.44	10	0.19591	0.0001
GO:0016248	channel inhibitor activity	33	1	0.22	216	0.19801	0.20938
GO:0120013	lipid transfer activity	34	1	0.23	218	0.20336	0.215
GO:0043021	ribonucleoprotein complex binding	127	2	0.85	223	0.20715	0.22718
GO:0005096	GTPase activator activity	236	3	1.57	229	0.20783	0.23442
GO:0048487	beta-tubulin binding	36	1	0.24	221	0.21396	0.22611
GO:0005246	calcium channel regulator activity	36	1	0.24	222	0.21396	0.22611
GO:0043531	ADP binding	37	1	0.25	225	0.2192	0.23161
GO:0019212	phosphatase inhibitor activity	37	1	0.25	226	0.2192	0.23161
GO:0004601	peroxidase activity	37	1	0.25	227	0.2192	0.23161
GO:0008138	protein tyrosine/serine/threonine phosph...	37	1	0.25	228	0.2192	0.23161
GO:0061134	peptidase regulator activity	132	2	0.88	233	0.21935	0.24027
GO:0036002	pre-mRNA binding	38	1	0.25	230	0.22441	0.23707

## Sheet: MPC
Supplementary Table 4. T cell recluster GO results -- MPC
GO.ID	Term	Annotated	Significant	Expected	Rank in Fisher.classic	Fisher.elim	Fisher.classic
GO:0031145	anaphase-promoting complex-dependent cat...	80	14	1.04	7	1.6e-12	3.7e-12
GO:0051301	cell division	542	32	7.02	4	2.2e-10	2.5e-12
GO:0051384	response to glucocorticoid	102	11	1.32	59	8.1e-08	1.5e-07
GO:0043922	negative regulation by host of viral tra...	13	5	0.17	76	4.1e-07	5.5e-07
GO:0002082	regulation of oxidative phosphorylation	27	6	0.35	87	1e-06	1.5e-06
GO:0010972	negative regulation of G2/M transition o...	89	9	1.15	97	2.2e-06	3.6e-06
GO:0042542	response to hydrogen peroxide	118	10	1.53	104	3e-06	5.2e-06
GO:0061418	regulation of transcription from RNA pol...	73	8	0.95	107	4.4e-06	6.9e-06
GO:0030261	chromosome condensation	37	6	0.48	115	7.2e-06	1e-05
GO:0061621	canonical glycolysis	23	5	0.3	123	9.6e-06	1.3e-05
GO:0043457	regulation of cellular respiration	24	5	0.31	129	1.2e-05	1.6e-05
GO:0000226	microtubule cytoskeleton organization	521	23	6.75	81	1.6e-05	7.9e-07
GO:0043388	positive regulation of DNA binding	50	6	0.65	166	4.3e-05	6e-05
GO:0043488	regulation of mRNA stability	172	10	2.23	192	8.1e-05	0.00013
GO:0006521	regulation of cellular amino acid metabo...	56	6	0.73	184	8.3e-05	0.00012
GO:0016579	protein deubiquitination	245	12	3.17	199	8.4e-05	0.00015
GO:0042775	mitochondrial ATP synthesis coupled elec...	82	7	1.06	191	9.1e-05	0.00013
GO:0038095	Fc-epsilon receptor signaling pathway	112	8	1.45	200	0.0001	0.00016
GO:0007094	mitotic spindle assembly checkpoint	34	7	0.44	63	0.00011	3.3e-07
GO:0002407	dendritic cell chemotaxis	20	4	0.26	196	0.00011	0.00014
GO:0071346	cellular response to interferon-gamma	149	9	1.93	215	0.00014	0.00022
GO:1901654	response to ketone	159	11	2.06	120	0.0002	1.2e-05
GO:0070498	interleukin-1-mediated signaling pathway	94	7	1.22	232	0.00022	0.00031
GO:0016032	viral process	847	31	10.98	75	0.00022	5.2e-07
GO:0061687	detoxification of inorganic compound	10	3	0.13	229	0.00024	0.00029
GO:1902036	regulation of hematopoietic stem cell di...	69	6	0.89	243	0.00027	0.00037
GO:0015949	nucleobase-containing small molecule int...	25	4	0.32	239	0.00028	0.00035
GO:0051345	positive regulation of hydrolase activit...	650	20	8.42	280	0.00029	0.00064
GO:0002479	antigen processing and presentation of e...	71	6	0.92	254	0.00031	0.00043
GO:0097501	stress response to metal ion	11	3	0.14	246	0.00033	0.00039
GO:0045840	positive regulation of mitotic nuclear d...	48	5	0.62	264	0.00038	0.0005
GO:0061844	antimicrobial humoral immune response me...	27	4	0.35	259	0.00038	0.00048
GO:0000278	mitotic cell cycle	940	50	12.18	1	0.0004	3e-17
GO:0046688	response to copper ion	28	4	0.36	269	0.00044	0.00055
GO:2000816	negative regulation of mitotic sister ch...	37	9	0.48	18	0.00046	1.3e-09
GO:0032392	DNA geometric change	107	7	1.39	285	0.00048	0.00068
GO:0052548	regulation of endopeptidase activity	296	12	3.84	296	0.00048	0.00082
GO:0032355	response to estradiol	108	7	1.4	289	0.00051	0.00072
GO:0051782	negative regulation of cell division	13	3	0.17	282	0.00056	0.00066
GO:0006310	DNA recombination	259	11	3.36	306	0.00056	0.00093
GO:0071276	cellular response to cadmium ion	30	4	0.39	288	0.00057	0.00072
GO:0050832	defense response to fungus	14	3	0.18	297	0.0007	0.00084
GO:0090266	regulation of mitotic cell cycle spindle...	14	3	0.18	298	0.0007	0.00084
GO:1903902	positive regulation of viral life cycle	56	5	0.73	308	0.00077	0.00101
GO:0042769	DNA damage response detection of DNA da…	33	4	0.43	311	0.00083	0.00104
GO:0031100	animal organ regeneration	57	5	0.74	315	0.00084	0.0011
GO:0009263	deoxyribonucleotide biosynthetic process	15	3	0.19	309	0.00087	0.00103
GO:0070233	negative regulation of T cell apoptotic ...	15	3	0.19	310	0.00087	0.00103
GO:0051347	positive regulation of transferase activ...	592	20	7.67	211	0.00088	0.00019
GO:0006296	nucleotide-excision repair DNA incision…	34	4	0.44	319	0.00093	0.00117
GO:0042493	response to drug	298	14	3.86	169	0.001	6.5e-05
GO:0031146	SCF-dependent proteasomal ubiquitin-depe...	89	6	1.15	335	0.00104	0.00142
GO:0002418	immune response to tumor cell	16	3	0.21	326	0.00106	0.00126
GO:0042127	regulation of cell population proliferat...	1286	33	16.66	235	0.00118	0.00033
GO:0006342	chromatin silencing	62	5	0.8	350	0.00123	0.00161
GO:0009200	deoxyribonucleoside triphosphate metabol...	17	3	0.22	343	0.00127	0.00151
GO:0010801	negative regulation of peptidyl-threonin...	17	3	0.22	344	0.00127	0.00151
GO:0006266	DNA ligation	17	3	0.22	345	0.00127	0.00151
GO:0071356	cellular response to tumor necrosis fact...	244	10	3.16	378	0.00131	0.00205
GO:0017148	negative regulation of translation	129	7	1.67	377	0.00145	0.00204
GO:0034501	protein localization to kinetochore	18	3	0.23	362	0.00151	0.0018
GO:0140131	positive regulation of lymphocyte chemot...	18	3	0.23	363	0.00151	0.0018
GO:0042981	regulation of apoptotic process	1246	32	16.15	248	0.00152	0.0004
GO:0051591	response to cAMP	65	5	0.84	375	0.00152	0.00198
GO:0045740	positive regulation of DNA replication	39	4	0.51	371	0.00157	0.00196
GO:0014075	response to amine	39	4	0.51	372	0.00157	0.00196
GO:0051445	regulation of meiotic cell cycle	39	4	0.51	373	0.00157	0.00196
GO:0006913	nucleocytoplasmic transport	322	15	4.17	153	0.00158	3.9e-05
GO:1903580	positive regulation of ATP metabolic pro...	40	4	0.52	383	0.00173	0.00216
GO:0090025	regulation of monocyte chemotaxis	19	3	0.25	379	0.00178	0.00211
GO:0042276	error-prone translesion synthesis	19	3	0.25	380	0.00178	0.00211
GO:0046686	response to cadmium ion	50	7	0.65	102	0.00195	5.1e-06
GO:0001738	morphogenesis of a polarized epithelium	136	7	1.76	409	0.00196	0.00275
GO:0001666	response to hypoxia	298	17	3.86	80	0.00202	7.7e-07
GO:0009147	pyrimidine nucleoside triphosphate metab...	20	3	0.26	401	0.00207	0.00246
GO:0006297	nucleotide-excision repair DNA gap fill…	20	3	0.26	402	0.00207	0.00246
GO:0002437	inflammatory response to antigenic stimu...	42	4	0.54	403	0.00208	0.00259
GO:0006283	transcription-coupled nucleotide-excisio...	70	5	0.91	410	0.00212	0.00275
GO:0019221	cytokine-mediated signaling pathway	630	25	8.16	90	0.00223	1.8e-06
GO:0042592	homeostatic process	1497	34	19.4	390	0.00226	0.00225
GO:0070987	error-free translesion synthesis	21	3	0.27	413	0.0024	0.00284
GO:0010499	proteasomal ubiquitin-independent protei...	21	3	0.27	414	0.0024	0.00284
GO:0035970	peptidyl-threonine dephosphorylation	21	3	0.27	415	0.0024	0.00284
GO:0034614	cellular response to reactive oxygen spe...	141	7	1.83	431	0.0024	0.00336
GO:0006259	DNA metabolic process	834	31	10.81	70	0.00243	3.7e-07
GO:0071396	cellular response to lipid	457	14	5.92	459	0.00252	0.00434
GO:0050852	T cell receptor signaling pathway	182	8	2.36	444	0.00257	0.00371
GO:0140013	meiotic nuclear division	131	9	1.7	174	0.00268	8.2e-05
GO:0044788	modulation by host of viral process	22	3	0.29	425	0.00275	0.00326
GO:0051592	response to calcium ion	120	8	1.55	223	0.00278	0.00025
GO:0006406	mRNA export from nucleus	108	6	1.4	446	0.0028	0.00376
GO:0001706	endoderm formation	46	4	0.6	437	0.00291	0.00361
GO:0000188	inactivation of MAPK activity	23	3	0.3	441	0.00313	0.00371
GO:1904666	regulation of ubiquitin protein ligase a...	23	3	0.3	442	0.00313	0.00371
GO:0009144	purine nucleoside triphosphate metabolic...	78	5	1.01	460	0.0034	0.00439
GO:0007052	mitotic spindle organization	113	6	1.46	464	0.0035	0.0047
GO:0038061	NIK/NF-kappaB signaling	151	7	1.96	473	0.00352	0.00489
GO:0007064	mitotic sister chromatid cohesion	24	3	0.31	456	0.00354	0.0042
GO:0009615	response to virus	280	10	3.63	487	0.00356	0.00544
GO:0007346	regulation of mitotic cell cycle	578	33	7.49	5	0.0038	2.7e-12
GO:0065004	protein-DNA complex assembly	197	12	2.55	136	0.00392	1.8e-05
GO:0044092	negative regulation of molecular functio...	901	24	11.67	332	0.004	0.0014
GO:0043486	histone exchange	51	4	0.66	482	0.00424	0.00524
GO:0055007	cardiac muscle cell differentiation	83	5	1.08	492	0.00444	0.00572
GO:0000398	mRNA splicing via spliceosome	337	11	4.37	513	0.0045	0.00702
GO:0010628	positive regulation of gene expression	1821	44	23.6	182	0.00482	0.00011
GO:0016572	histone phosphorylation	38	5	0.49	203	0.00483	0.00016
GO:0010942	positive regulation of cell death	616	18	7.98	381	0.00485	0.00212
GO:0007127	meiosis I	85	5	1.1	503	0.00491	0.00632
GO:0000165	MAPK cascade	746	21	9.67	337	0.00508	0.00144
GO:0045727	positive regulation of translation	122	6	1.58	508	0.00509	0.00679
GO:0007568	aging	251	9	3.25	533	0.00546	0.008
GO:0060548	negative regulation of cell death	801	22	10.38	347	0.00546	0.00152
GO:0030262	apoptotic nuclear changes	28	3	0.36	505	0.00552	0.00653
GO:0006294	nucleotide-excision repair preincision …	28	3	0.36	506	0.00552	0.00653
GO:0060395	SMAD protein signal transduction	55	4	0.71	509	0.00556	0.00686
GO:0000070	mitotic sister chromatid segregation	152	15	1.97	25	0.00573	2.7e-09
GO:0045737	positive regulation of cyclin-dependent ...	29	3	0.38	516	0.0061	0.00721
GO:0006298	mismatch repair	29	3	0.38	517	0.0061	0.00721
GO:0006221	pyrimidine nucleotide biosynthetic proce...	29	3	0.38	518	0.0061	0.00721
GO:0045069	regulation of viral genome replication	90	5	1.17	535	0.00625	0.00801
GO:0035690	cellular response to drug	58	4	0.75	537	0.00671	0.00827
GO:0032735	positive regulation of interleukin-12 pr...	30	3	0.39	529	0.00672	0.00793
GO:0061842	microtubule organizing center localizati...	30	3	0.39	530	0.00672	0.00793
GO:0009394	2'-deoxyribonucleotide metabolic process	30	3	0.39	531	0.00672	0.00793
GO:0010389	regulation of G2/M transition of mitotic...	185	14	2.4	62	0.00677	2.6e-07
GO:0002223	stimulatory C-type lectin receptor signa...	92	5	1.19	548	0.00685	0.00877
GO:0061640	cytoskeleton-dependent cytokinesis	92	5	1.19	549	0.00685	0.00877
GO:0044772	mitotic cell cycle phase transition	531	30	6.88	11	0.00697	3.9e-11
GO:0009162	deoxyribonucleoside monophosphate metabo...	10	2	0.13	522	0.00702	0.00788
GO:0045876	positive regulation of sister chromatid ...	10	2	0.13	523	0.00702	0.00788
GO:0045657	positive regulation of monocyte differen...	10	2	0.13	524	0.00702	0.00788
GO:0010649	regulation of cell communication by elec...	10	2	0.13	525	0.00702	0.00788
GO:0032070	regulation of deoxyribonuclease activity	10	2	0.13	526	0.00702	0.00788
GO:0051280	negative regulation of release of seques...	10	2	0.13	527	0.00702	0.00788
GO:0051709	regulation of killing of cells of other ...	10	2	0.13	528	0.00702	0.00788
GO:0051701	interaction with host	173	7	2.24	581	0.00734	0.01005
GO:2000144	positive regulation of DNA-templated tra...	31	3	0.4	544	0.00737	0.00869
GO:0045616	regulation of keratinocyte differentiati...	31	3	0.4	545	0.00737	0.00869
GO:0070098	chemokine-mediated signaling pathway	60	4	0.78	554	0.00756	0.0093
GO:0017038	protein import	175	7	2.27	589	0.0078	0.01066
GO:0006626	protein targeting to mitochondrion	95	5	1.23	579	0.00783	0.01
GO:0090263	positive regulation of canonical Wnt sig...	134	6	1.74	587	0.00797	0.01055
GO:0000083	regulation of transcription involved in ...	32	3	0.41	557	0.00805	0.00949
GO:0009636	response to toxic substance	190	10	2.46	231	0.00829	0.0003
GO:0009314	response to radiation	367	11	4.76	622	0.00837	0.01278
GO:0002449	lymphocyte mediated immunity	222	8	2.88	608	0.00839	0.0118
GO:0033632	regulation of cell-cell adhesion mediate...	11	2	0.14	560	0.0085	0.00955
GO:0009143	nucleoside triphosphate catabolic proces...	11	2	0.14	561	0.0085	0.00955
GO:0001829	trophectodermal cell differentiation	11	2	0.14	562	0.0085	0.00955
GO:0045898	regulation of RNA polymerase II transcri...	11	2	0.14	563	0.0085	0.00955
GO:0006089	lactate metabolic process	11	2	0.14	564	0.0085	0.00955
GO:0035404	histone-serine phosphorylation	11	2	0.14	565	0.0085	0.00955
GO:0070234	positive regulation of T cell apoptotic ...	11	2	0.14	566	0.0085	0.00955
GO:0019042	viral latency	11	2	0.14	567	0.0085	0.00955
GO:0150105	protein localization to cell-cell juncti...	11	2	0.14	568	0.0085	0.00955
GO:0072677	eosinophil migration	11	2	0.14	569	0.0085	0.00955
GO:0006449	regulation of translational termination	11	2	0.14	570	0.0085	0.00955
GO:0098974	postsynaptic actin cytoskeleton organiza...	11	2	0.14	571	0.0085	0.00955
GO:0090493	catecholamine uptake	11	2	0.14	572	0.0085	0.00955
GO:0005513	detection of calcium ion	11	2	0.14	573	0.0085	0.00955
GO:0010958	regulation of amino acid import across p...	11	2	0.14	574	0.0085	0.00955
GO:0001775	cell activation	1167	25	15.12	691	0.00857	0.01758
GO:0043270	positive regulation of ion transport	223	8	2.89	616	0.0086	0.0121
GO:0051173	positive regulation of nitrogen compound...	2585	54	33.5	284	0.00867	0.00068
GO:2000278	regulation of DNA biosynthetic process	99	5	1.28	610	0.00927	0.01182
GO:0043243	positive regulation of protein-containin...	34	3	0.44	592	0.00953	0.01122
GO:0033574	response to testosterone	34	3	0.44	593	0.00953	0.01122
GO:0008608	attachment of spindle microtubules to ki...	34	3	0.44	594	0.00953	0.01122
GO:0007292	female gamete generation	100	5	1.3	619	0.00966	0.01231
GO:0050679	positive regulation of epithelial cell p...	140	6	1.81	623	0.00978	0.0129
GO:0009617	response to bacterium	428	12	5.55	669	0.00992	0.01543
GO:0043549	regulation of kinase activity	779	23	10.09	255	0.01005	0.00044
GO:0009265	2'-deoxyribonucleotide biosynthetic proc...	12	2	0.16	596	0.01012	0.01136
GO:0060576	intestinal epithelial cell development	12	2	0.16	597	0.01012	0.01136
GO:0046385	deoxyribose phosphate biosynthetic proce...	12	2	0.16	598	0.01012	0.01136
GO:0018119	peptidyl-cysteine S-nitrosylation	12	2	0.16	599	0.01012	0.01136
GO:0002834	regulation of response to tumor cell	12	2	0.16	600	0.01012	0.01136
GO:0002837	regulation of immune response to tumor c...	12	2	0.16	601	0.01012	0.01136
GO:0017014	protein nitrosylation	12	2	0.16	602	0.01012	0.01136
GO:0051412	response to corticosterone	12	2	0.16	603	0.01012	0.01136
GO:0007077	mitotic nuclear envelope disassembly	12	2	0.16	604	0.01012	0.01136
GO:0071216	cellular response to biotic stimulus	184	7	2.38	641	0.01012	0.01376
GO:0043281	regulation of cysteine-type endopeptidas...	184	7	2.38	642	0.01012	0.01376
GO:0050850	positive regulation of calcium-mediated ...	35	3	0.45	617	0.01033	0.01215
GO:0060071	Wnt signaling pathway planar cell polar…	102	5	1.32	636	0.01047	0.01332
GO:0006611	protein export from nucleus	176	10	2.28	202	0.01065	0.00016
GO:0016202	regulation of striated muscle tissue dev...	103	5	1.33	644	0.01089	0.01385
GO:0045132	meiotic chromosome segregation	67	4	0.87	639	0.01108	0.01358
GO:0051338	regulation of transferase activity	878	32	11.38	68	0.01113	3.6e-07
GO:0045070	positive regulation of viral genome repl...	36	3	0.47	625	0.01116	0.01313
GO:0090175	regulation of establishment of planar po...	104	5	1.35	650	0.01132	0.01439
GO:1903047	mitotic cell cycle process	812	44	10.52	2	0.01144	1.9e-15
GO:0043933	protein-containing complex subunit organ...	1688	44	21.87	135	0.01149	1.8e-05
GO:0046718	viral entry into host cell	105	5	1.36	654	0.01177	0.01495
GO:0051988	regulation of attachment of spindle micr...	13	2	0.17	627	0.01186	0.0133
GO:0090026	positive regulation of monocyte chemotax...	13	2	0.17	628	0.01186	0.0133
GO:0021854	hypothalamus development	13	2	0.17	629	0.01186	0.0133
GO:0033151	V(D)J recombination	13	2	0.17	630	0.01186	0.0133
GO:0033127	regulation of histone phosphorylation	13	2	0.17	631	0.01186	0.0133
GO:0005200	structural constituent of cytoskeleton	73	11	0.91	1	1.6e-09	3.2e-09
GO:0005515	protein binding	10921	171	136.8	3	5.2e-09	9.7e-07
GO:0031492	nucleosomal DNA binding	36	6	0.45	5	5.1e-06	7.4e-06
GO:0003697	single-stranded DNA binding	107	9	1.34	6	7.7e-06	1.3e-05
GO:0043539	protein serine/threonine kinase activato...	32	5	0.4	9	4.5e-05	6.1e-05
GO:0003723	RNA binding	1537	45	19.25	2	0.00014	2.7e-07
GO:0031625	ubiquitin protein ligase binding	283	12	3.54	20	0.00024	0.00043
GO:0008301	DNA binding bending	11	3	0.14	17	0.0003	0.00036
GO:0017017	MAP kinase tyrosine/serine/threonine pho...	11	3	0.14	18	0.0003	0.00036
GO:0042802	identical protein binding	1587	39	19.88	11	0.00068	0.00012
GO:0003682	chromatin binding	512	21	6.41	4	0.00069	5.1e-06
GO:0003924	GTPase activity	281	11	3.52	29	0.00083	0.00143
GO:0003823	antigen binding	59	5	0.74	25	0.00084	0.00114
GO:0023026	MHC class II protein complex binding	16	3	0.2	26	0.00096	0.00116
GO:0003684	damaged DNA binding	62	5	0.78	28	0.00106	0.00142
GO:0035173	histone kinase activity	17	3	0.21	27	0.00115	0.0014
GO:0003725	double-stranded RNA binding	70	5	0.88	35	0.00183	0.00244
GO:0004298	threonine-type endopeptidase activity	20	3	0.25	33	0.00188	0.00227
GO:0042056	chemoattractant activity	20	3	0.25	34	0.00188	0.00227
GO:0000979	RNA polymerase II core promoter sequence...	21	3	0.26	37	0.00218	0.00263
GO:0016538	cyclin-dependent protein serine/threonin...	45	4	0.56	38	0.00237	0.00302
GO:0019900	kinase binding	671	22	8.4	10	0.00241	9.3e-05
GO:0043130	ubiquitin binding	76	5	0.95	39	0.00263	0.00349
GO:0008144	drug binding	76	5	0.95	40	0.00263	0.00349
GO:0015631	tubulin binding	330	11	4.13	49	0.00298	0.00492
GO:0019956	chemokine binding	25	3	0.31	45	0.00363	0.00437
GO:0008134	transcription factor binding	553	15	6.93	57	0.00408	0.00747
GO:0048020	CCR chemokine receptor binding	27	3	0.34	52	0.00453	0.00545
GO:0003729	mRNA binding	269	11	3.37	24	0.0049	0.00101
GO:0030234	enzyme regulator activity	837	24	10.48	16	0.00517	0.00034
GO:0097718	disordered domain specific binding	29	3	0.36	54	0.00556	0.00668
GO:0008009	chemokine activity	30	3	0.38	55	0.00612	0.00734
GO:0016853	isomerase activity	133	6	1.67	60	0.00656	0.00897
GO:0099186	structural constituent of postsynapse	10	2	0.13	56	0.00657	0.00747
GO:0051019	mitogen-activated protein kinase binding	31	3	0.39	58	0.00671	0.00805
GO:0008022	protein C-terminus binding	179	7	2.24	64	0.00736	0.01039
GO:0005522	profilin binding	11	2	0.14	61	0.00797	0.00905
GO:0008179	adenylate cyclase binding	11	2	0.14	62	0.00797	0.00905
GO:1990825	sequence-specific mRNA binding	11	2	0.14	63	0.00797	0.00905
GO:0042803	protein homodimerization activity	541	14	6.78	72	0.00816	0.01408
GO:0000287	magnesium ion binding	183	7	2.29	67	0.00826	0.01164
GO:0047485	protein N-terminus binding	100	5	1.25	66	0.00842	0.01102
GO:0004722	protein serine/threonine phosphatase act...	66	4	0.83	68	0.00938	0.01175
GO:0072542	protein phosphatase activator activity	12	2	0.15	65	0.00948	0.01077
GO:0019901	protein kinase binding	592	17	7.42	36	0.00971	0.00252
GO:0050998	nitric-oxide synthase binding	13	2	0.16	69	0.01111	0.01261
GO:0015037	peptide disulfide oxidoreductase activit...	13	2	0.16	70	0.01111	0.01261
GO:0017070	U6 snRNA binding	14	2	0.18	73	0.01286	0.01459
GO:0140297	DNA-binding transcription factor binding	308	9	3.86	85	0.01563	0.02297
GO:0005092	GDP-dissociation inhibitor activity	16	2	0.2	78	0.01668	0.0189
GO:0030247	polysaccharide binding	16	2	0.2	79	0.01668	0.0189
GO:0046982	protein heterodimerization activity	264	8	3.31	89	0.0182	0.02585
GO:0019904	protein domain specific binding	637	17	7.98	51	0.01841	0.00528
GO:0000400	four-way junction DNA binding	17	2	0.21	82	0.01875	0.02124
GO:0019957	C-C chemokine binding	17	2	0.21	83	0.01875	0.02124
GO:0003746	translation elongation factor activity	17	2	0.21	84	0.01875	0.02124
GO:0044389	ubiquitin-like protein ligase binding	301	14	3.77	8	0.01903	5.4e-05
GO:0003730	mRNA 3'-UTR binding	82	4	1.03	87	0.01953	0.02422
GO:0044877	protein-containing complex binding	1078	29	13.5	12	0.02015	0.00023
GO:0042605	peptide antigen binding	18	2	0.23	86	0.02093	0.02369
GO:0005525	GTP binding	324	9	4.06	95	0.02097	0.03047
GO:0032550	purine ribonucleoside binding	328	9	4.11	100	0.02249	0.03258
GO:0001530	lipopolysaccharide binding	19	2	0.24	90	0.0232	0.02624
GO:0070182	DNA polymerase binding	19	2	0.24	91	0.0232	0.02624
GO:0001883	purine nucleoside binding	331	9	4.15	101	0.02368	0.03424
GO:0032549	ribonucleoside binding	331	9	4.15	102	0.02368	0.03424
GO:0004725	protein tyrosine phosphatase activity	87	4	1.09	94	0.0237	0.02929
GO:0070412	R-SMAD binding	20	2	0.25	93	0.02557	0.02891
GO:0001882	nucleoside binding	336	9	4.21	106	0.02576	0.03712
GO:0008047	enzyme activator activity	446	15	5.59	23	0.02693	0.00098
GO:0032561	guanyl ribonucleotide binding	339	9	4.25	110	0.02707	0.03892
GO:0019001	guanyl nucleotide binding	339	9	4.25	111	0.02707	0.03892
GO:0042562	hormone binding	52	3	0.65	99	0.02728	0.03231
GO:0004129	cytochrome-c oxidase activity	21	2	0.26	96	0.02803	0.03167
GO:0016676	oxidoreductase activity acting on a hem…	21	2	0.26	97	0.02803	0.03167
GO:0015002	heme-copper terminal oxidase activity	21	2	0.26	98	0.02803	0.03167
GO:0009055	electron transfer activity	92	4	1.15	105	0.02837	0.03495
GO:0030246	carbohydrate binding	184	6	2.3	109	0.02837	0.03742
GO:0140375	immune receptor activity	94	4	1.18	107	0.03038	0.03738
GO:0051087	chaperone binding	94	4	1.18	108	0.03038	0.03738
GO:0003688	DNA replication origin binding	22	2	0.28	103	0.03058	0.03454
GO:0016675	oxidoreductase activity acting on a hem…	22	2	0.28	104	0.03058	0.03454
GO:0061629	RNA polymerase II-specific DNA-binding t...	239	7	2.99	113	0.03097	0.04197
GO:0051082	unfolded protein binding	99	4	1.24	115	0.03576	0.04387
GO:0140272	exogenous protein binding	59	3	0.74	117	0.03768	0.04443
GO:0001618	virus receptor activity	59	3	0.74	118	0.03768	0.04443
GO:0035925	mRNA 3'-UTR AU-rich region binding	25	2	0.31	114	0.03876	0.0437
GO:0017091	AU-rich element binding	26	2	0.33	119	0.04165	0.04694
GO:0050681	androgen receptor binding	26	2	0.33	120	0.04165	0.04694
GO:0043548	phosphatidylinositol 3-kinase binding	26	2	0.33	121	0.04165	0.04694
GO:0042826	histone deacetylase binding	104	4	1.3	122	0.04166	0.05095
GO:0016835	carbon-oxygen lyase activity	63	3	0.79	123	0.0444	0.05224
GO:0071889	14-3-3 protein binding	28	2	0.35	124	0.04767	0.05366
GO:0005164	tumor necrosis factor receptor binding	28	2	0.35	125	0.04767	0.05366
GO:0033613	activating transcription factor binding	66	3	0.83	127	0.04982	0.05851
GO:0140142	nucleocytoplasmic carrier activity	30	2	0.38	129	0.05398	0.0607
GO:0046983	protein dimerization activity	827	21	10.36	41	0.05678	0.00355
GO:0003712	transcription coregulator activity	450	10	5.64	138	0.05691	0.08075
GO:0035198	miRNA binding	31	2	0.39	130	0.05724	0.06433
GO:0000217	DNA secondary structure binding	32	2	0.4	132	0.06056	0.06803
GO:0042287	MHC protein binding	32	2	0.4	133	0.06056	0.06803
GO:0035258	steroid hormone receptor binding	74	3	0.93	137	0.06572	0.07682
GO:0042277	peptide binding	228	6	2.86	141	0.06726	0.08618
GO:0008536	Ran GTPase binding	34	2	0.43	135	0.06741	0.07564
GO:0004869	cysteine-type endopeptidase inhibitor ac...	34	2	0.43	136	0.06741	0.07564
GO:0033218	amide binding	289	7	3.62	145	0.0716	0.09383
GO:0048487	beta-tubulin binding	36	2	0.45	139	0.0745	0.0835
GO:0043021	ribonucleoprotein complex binding	127	4	1.59	142	0.07545	0.09096
GO:0005096	GTPase activator activity	236	6	2.96	146	0.07659	0.09763
GO:0008017	microtubule binding	240	6	3.01	149	0.08152	0.10365
GO:0036002	pre-mRNA binding	38	2	0.48	143	0.08181	0.0916
GO:0015036	disulfide oxidoreductase activity	38	2	0.48	144	0.08181	0.0916
GO:0003713	transcription coactivator activity	244	6	3.06	155	0.08662	0.10985
GO:0045296	cadherin binding	304	7	3.81	158	0.08806	0.11427
GO:0060589	nucleoside-triphosphatase regulator acti...	305	7	3.82	159	0.08923	0.11571
GO:0001102	RNA polymerase II activating transcripti...	40	2	0.5	147	0.08933	0.09991
GO:0032813	tumor necrosis factor receptor superfami...	41	2	0.51	150	0.09317	0.10415
GO:0016860	intramolecular oxidoreductase activity	41	2	0.51	151	0.09317	0.10415
GO:0061980	regulatory RNA binding	41	2	0.51	152	0.09317	0.10415
GO:0005507	copper ion binding	43	2	0.54	156	0.10098	0.11276
GO:0017069	snRNA binding	43	2	0.54	157	0.10098	0.11276
GO:0005125	cytokine activity	121	6	1.52	53	0.10248	0.00573
GO:0016922	nuclear receptor binding	90	3	1.13	160	0.10342	0.11978
GO:0023023	MHC protein complex binding	25	4	0.31	15	0.10564	0.00032
GO:0004857	enzyme inhibitor activity	258	6	3.23	171	0.10583	0.13303
GO:0004866	endopeptidase inhibitor activity	92	3	1.15	162	0.10863	0.12567
GO:0005080	protein kinase C binding	45	2	0.56	161	0.10896	0.12155
GO:0030414	peptidase inhibitor activity	93	3	1.16	169	0.11127	0.12865
GO:0016491	oxidoreductase activity	579	11	7.25	193	0.11145	0.15419
GO:0090079	translation regulator activity nucleic …	95	3	1.19	172	0.11663	0.13469
GO:0098505	G-rich strand telomeric DNA binding	10	1	0.13	163	0.11847	0.12611
GO:0030957	Tat protein binding	10	1	0.13	164	0.11847	0.12611
GO:0019855	calcium channel inhibitor activity	10	1	0.13	165	0.11847	0.12611
GO:0001846	opsonin binding	10	1	0.13	166	0.11847	0.12611
GO:0032404	mismatch repair complex binding	10	1	0.13	167	0.11847	0.12611
GO:0031386	protein tag	10	1	0.13	168	0.11847	0.12611
GO:0030695	GTPase regulator activity	267	6	3.34	186	0.11926	0.14907
GO:0016829	lyase activity	151	4	1.89	185	0.1216	0.14451
GO:0042393	histone binding	210	5	2.63	192	0.12416	0.15132
GO:0016836	hydro-lyase activity	49	2	0.61	183	0.1254	0.1396
GO:0030955	potassium ion binding	11	1	0.14	173	0.12952	0.13781
GO:0060229	lipase activator activity	11	1	0.14	174	0.12952	0.13781
GO:0005212	structural constituent of eye lens	11	1	0.14	175	0.12952	0.13781
GO:0001972	retinoic acid binding	11	1	0.14	176	0.12952	0.13781
GO:0001848	complement binding	11	1	0.14	177	0.12952	0.13781
GO:0005049	nuclear export signal receptor activity	11	1	0.14	178	0.12952	0.13781
GO:0016668	oxidoreductase activity acting on a sul…	11	1	0.14	179	0.12952	0.13781
GO:0016004	phospholipase activator activity	11	1	0.14	180	0.12952	0.13781
GO:0035256	G protein-coupled glutamate receptor bin...	11	1	0.14	181	0.12952	0.13781
GO:0045236	CXCR chemokine receptor binding	11	1	0.14	182	0.12952	0.13781
GO:0051287	NAD binding	50	2	0.63	184	0.1296	0.1442
GO:0061135	endopeptidase regulator activity	100	3	1.25	191	0.13044	0.15021
GO:0043047	single-stranded telomeric DNA binding	12	1	0.15	187	0.14043	0.14936
GO:0008353	RNA polymerase II CTD heptapeptide repea...	12	1	0.15	188	0.14043	0.14936
GO:0097157	pre-mRNA intronic binding	12	1	0.15	189	0.14043	0.14936
GO:0071837	HMG box domain binding	12	1	0.15	190	0.14043	0.14936
GO:1990841	promoter-specific chromatin binding	53	2	0.66	194	0.14239	0.15818
GO:0050839	cell adhesion molecule binding	477	9	5.97	218	0.14522	0.19033
GO:0043022	ribosome binding	54	2	0.68	202	0.14671	0.1629
GO:0030983	mismatched DNA binding	13	1	0.16	195	0.1512	0.16076
GO:0034185	apolipoprotein binding	13	1	0.16	196	0.1512	0.16076
GO:0005501	retinoid binding	13	1	0.16	197	0.1512	0.16076
GO:0035497	cAMP response element binding	13	1	0.16	198	0.1512	0.16076
GO:0034450	ubiquitin-ubiquitin ligase activity	13	1	0.16	199	0.1512	0.16076
GO:0043274	phospholipase binding	13	1	0.16	200	0.1512	0.16076
GO:0019104	DNA N-glycosylase activity	13	1	0.16	201	0.1512	0.16076
GO:0097110	scaffold protein binding	56	2	0.7	208	0.15543	0.1724
GO:0016667	oxidoreductase activity acting on a sul…	56	2	0.7	209	0.15543	0.1724
GO:0005324	long-chain fatty acid transporter activi...	14	1	0.18	203	0.16185	0.172
GO:0098847	sequence-specific single stranded DNA bi...	14	1	0.18	204	0.16185	0.172
GO:0030296	protein tyrosine kinase activator activi...	14	1	0.18	205	0.16185	0.172
GO:0019840	isoprenoid binding	14	1	0.18	206	0.16185	0.172
GO:0044548	S100 protein binding	14	1	0.18	207	0.16185	0.172
GO:0097367	carbohydrate derivative binding	1855	28	23.24	273	0.16874	0.2754
GO:0005521	lamin binding	15	1	0.19	210	0.17236	0.18309
GO:0022829	wide pore channel activity	15	1	0.19	211	0.17236	0.18309
GO:0031681	G-protein beta-subunit binding	15	1	0.19	212	0.17236	0.18309
GO:0102567	phospholipase A2 activity (consuming 12…	15	1	0.19	213	0.17236	0.18309
GO:0102568	phospholipase A2 activity consuming 12…	15	1	0.19	214	0.17236	0.18309
GO:0031420	alkali metal ion binding	15	1	0.19	215	0.17236	0.18309
GO:0000900	translation repressor activity mRNA reg…	15	1	0.19	216	0.17236	0.18309
GO:0008574	ATP-dependent microtubule motor activity...	15	1	0.19	217	0.17236	0.18309
GO:0016887	ATPase activity	365	7	4.57	233	0.17457	0.21803
GO:0035639	purine ribonucleoside triphosphate bindi...	1569	24	19.65	272	0.17566	0.27359
GO:0031072	heat shock protein binding	116	3	1.45	223	0.17802	0.20321
GO:0016462	pyrophosphatase activity	735	19	9.21	46	0.17861	0.00456
GO:0031683	G-protein beta/gamma-subunit complex bin...	16	1	0.2	219	0.18273	0.19404
GO:0016493	C-C chemokine receptor activity	16	1	0.2	220	0.18273	0.19404
GO:0016646	oxidoreductase activity acting on the C…	16	1	0.2	221	0.18273	0.19404
GO:0004550	nucleoside diphosphate kinase activity	16	1	0.2	222	0.18273	0.19404
GO:0016817	hydrolase activity acting on acid anhyd…	738	19	9.24	47	0.18303	0.00476
GO:0016818	hydrolase activity acting on acid anhyd…	738	19	9.24	48	0.18303	0.00476
GO:0001228	DNA-binding transcription activator acti...	371	7	4.65	243	0.18461	0.22974
GO:0001216	DNA-binding transcription activator acti...	374	7	4.68	245	0.18972	0.23567
GO:0043024	ribosomal small subunit binding	17	1	0.21	224	0.19298	0.20484
GO:0055106	ubiquitin-protein transferase regulator ...	17	1	0.21	225	0.19298	0.20484
GO:0016864	intramolecular oxidoreductase activity …	17	1	0.21	226	0.19298	0.20484
GO:0003756	protein disulfide isomerase activity	17	1	0.21	227	0.19298	0.20484
GO:0016769	transferase activity transferring nitro…	17	1	0.21	228	0.19298	0.20484
GO:0016209	antioxidant activity	65	2	0.81	232	0.19572	0.21612

## Sheet: T cell
Supplementary Table 4. T cell recluster GO results -- T cell
GO.ID	Term	Annotated	Significant	Expected	Rank in Fisher.classic	Fisher.elim	Fisher.classic
GO:1901654	response to ketone	159	8	1.06	21	1.1e-05	1.7e-05
GO:0017148	negative regulation of translation	129	7	0.86	28	2.4e-05	3.6e-05
GO:0009162	deoxyribonucleoside monophosphate metabo...	10	3	0.07	30	3.3e-05	4e-05
GO:2000573	positive regulation of DNA biosynthetic ...	65	5	0.43	45	7.1e-05	9.6e-05
GO:0016032	viral process	847	20	5.64	5	0.00011	1.6e-06
GO:0000723	telomere maintenance	146	10	0.97	1	0.00013	8.1e-08
GO:0000398	mRNA splicing via spliceosome	337	12	2.25	10	0.00019	4.5e-06
GO:0032206	positive regulation of telomere maintena...	50	4	0.33	74	0.00034	0.00043
GO:0048025	negative regulation of mRNA splicing vi…	22	3	0.15	82	0.0004	0.00048
GO:0015949	nucleobase-containing small molecule int...	25	3	0.17	91	0.00059	0.00071
GO:0052548	regulation of endopeptidase activity	296	8	1.97	119	0.00079	0.0012
GO:0042493	response to drug	298	8	1.99	122	0.00083	0.00126
GO:0006221	pyrimidine nucleotide biosynthetic proce...	29	3	0.19	116	0.00092	0.00111
GO:0045727	positive regulation of translation	122	5	0.81	141	0.00132	0.00175
GO:0042769	DNA damage response detection of DNA da…	33	3	0.22	137	0.00135	0.00162
GO:1901701	cellular response to oxygen-containing c...	946	15	6.3	176	0.00138	0.00265
GO:0006296	nucleotide-excision repair DNA incision…	34	3	0.23	142	0.00147	0.00177
GO:0043312	neutrophil degranulation	406	9	2.7	161	0.00151	0.00236
GO:0009636	response to toxic substance	190	6	1.27	160	0.00168	0.00232
GO:0006458	'de novo' protein folding	37	3	0.25	158	0.00189	0.00226
GO:0002070	epithelial cell maturation	10	2	0.07	156	0.00191	0.00216
GO:1904851	positive regulation of establishment of ...	10	2	0.07	157	0.00191	0.00216
GO:0043044	ATP-dependent chromatin remodeling	82	4	0.55	177	0.00217	0.00274
GO:0045740	positive regulation of DNA replication	39	3	0.26	174	0.0022	0.00264
GO:0009206	purine ribonucleoside triphosphate biosy...	58	5	0.39	33	0.00223	5.5e-05
GO:0070234	positive regulation of T cell apoptotic ...	11	2	0.07	167	0.00232	0.00263
GO:0019042	viral latency	11	2	0.07	168	0.00232	0.00263
GO:1904871	positive regulation of protein localizat...	11	2	0.07	169	0.00232	0.00263
GO:0072321	chaperone-mediated protein transport	11	2	0.07	170	0.00232	0.00263
GO:0007183	SMAD protein complex assembly	11	2	0.07	171	0.00232	0.00263
GO:0033048	negative regulation of mitotic sister ch...	40	3	0.27	179	0.00236	0.00283
GO:0006284	base-excision repair	40	3	0.27	180	0.00236	0.00283
GO:0009265	2'-deoxyribonucleotide biosynthetic proc...	12	2	0.08	184	0.00277	0.00314
GO:0070849	response to epidermal growth factor	44	3	0.29	201	0.00311	0.00372
GO:0031453	positive regulation of heterochromatin a...	13	2	0.09	199	0.00326	0.0037
GO:0032695	negative regulation of interleukin-12 pr...	13	2	0.09	200	0.00326	0.0037
GO:0006457	protein folding	202	8	1.35	44	0.00347	9.3e-05
GO:2001251	negative regulation of chromosome organi...	137	7	0.91	32	0.00357	5.3e-05
GO:0006338	chromatin remodeling	196	10	1.31	3	0.0037	1.3e-06
GO:0002181	cytoplasmic translation	95	4	0.63	222	0.0037	0.00465
GO:0009130	pyrimidine nucleoside monophosphate bios...	14	2	0.09	209	0.00379	0.0043
GO:0060009	Sertoli cell development	14	2	0.09	210	0.00379	0.0043
GO:1904874	positive regulation of telomerase RNA lo...	14	2	0.09	211	0.00379	0.0043
GO:0051345	positive regulation of hydrolase activit...	650	11	4.33	261	0.00386	0.00629
GO:0046683	response to organophosphorus	97	4	0.65	232	0.00398	0.005
GO:0006336	DNA replication-independent nucleosome a...	49	3	0.33	233	0.00422	0.00505
GO:0070233	negative regulation of T cell apoptotic ...	15	2	0.1	228	0.00436	0.00493
GO:0006260	DNA replication	254	9	1.69	40	0.00447	7.9e-05
GO:0007007	inner mitochondrial membrane organizatio...	50	3	0.33	238	0.00447	0.00534
GO:0042981	regulation of apoptotic process	1246	19	8.3	111	0.0047	0.00108
GO:0034508	centromere complex assembly	51	3	0.34	245	0.00473	0.00565
GO:0032210	regulation of telomere maintenance via t...	51	3	0.34	246	0.00473	0.00565
GO:0051384	response to glucocorticoid	102	4	0.68	253	0.00477	0.00597
GO:0043666	regulation of phosphoprotein phosphatase...	103	4	0.69	257	0.00493	0.00618
GO:0071294	cellular response to zinc ion	16	2	0.11	244	0.00496	0.00561
GO:0006306	DNA methylation	52	3	0.35	249	0.00499	0.00596
GO:0045071	negative regulation of viral genome repl...	52	3	0.35	250	0.00499	0.00596
GO:0034341	response to interferon-gamma	166	5	1.11	271	0.00501	0.00655
GO:0006986	response to unfolded protein	170	5	1.13	286	0.00553	0.00723
GO:0009200	deoxyribonucleoside triphosphate metabol...	17	2	0.11	262	0.00559	0.00633
GO:0009651	response to salt stress	17	2	0.11	263	0.00559	0.00633
GO:0043488	regulation of mRNA stability	172	5	1.15	289	0.00581	0.00758
GO:0051169	nuclear transport	325	10	2.17	47	0.00619	0.0001
GO:0009148	pyrimidine nucleoside triphosphate biosy...	18	2	0.12	277	0.00627	0.00709
GO:0009219	pyrimidine deoxyribonucleotide metabolic...	18	2	0.12	278	0.00627	0.00709
GO:2001169	regulation of ATP biosynthetic process	18	2	0.12	279	0.00627	0.00709
GO:0031100	animal organ regeneration	57	3	0.38	291	0.00646	0.0077
GO:0006413	translational initiation	177	5	1.18	305	0.00655	0.00853
GO:0007623	circadian rhythm	177	5	1.18	306	0.00655	0.00853
GO:0033260	nuclear DNA replication	58	3	0.39	298	0.00677	0.00808
GO:0071345	cellular response to cytokine stimulus	905	13	6.03	346	0.00678	0.01145
GO:0001889	liver development	113	4	0.75	308	0.00683	0.00853
GO:0051894	positive regulation of focal adhesion as...	19	2	0.13	294	0.00697	0.00789
GO:0035455	response to interferon-alpha	19	2	0.13	295	0.00697	0.00789
GO:0042276	error-prone translesion synthesis	19	2	0.13	296	0.00697	0.00789
GO:0010243	response to organonitrogen compound	846	14	5.64	165	0.0071	0.00252
GO:0034605	cellular response to heat	115	4	0.77	319	0.00726	0.00906
GO:0001101	response to acid chemical	115	4	0.77	320	0.00726	0.00906
GO:1900182	positive regulation of protein localizat...	72	5	0.48	51	0.00734	0.00016
GO:0008284	positive regulation of cell population p...	711	11	4.74	355	0.00749	0.0119
GO:0046827	positive regulation of protein export fr...	20	2	0.13	310	0.00771	0.00872
GO:0051570	regulation of histone H3-K9 methylation	20	2	0.13	311	0.00771	0.00872
GO:0006297	nucleotide-excision repair DNA gap fill…	20	2	0.13	312	0.00771	0.00872
GO:0051131	chaperone-mediated protein complex assem...	20	2	0.13	313	0.00771	0.00872
GO:0002407	dendritic cell chemotaxis	20	2	0.13	314	0.00771	0.00872
GO:0042542	response to hydrogen peroxide	118	4	0.79	334	0.00794	0.0099
GO:0006293	nucleotide-excision repair preincision …	21	2	0.14	326	0.00849	0.0096
GO:0006295	nucleotide-excision repair DNA incision…	21	2	0.14	327	0.00849	0.0096
GO:0070987	error-free translesion synthesis	21	2	0.14	328	0.00849	0.0096
GO:1990776	response to angiotensin	22	2	0.15	337	0.0093	0.01051
GO:0042026	protein refolding	22	2	0.15	338	0.0093	0.01051
GO:0032069	regulation of nuclease activity	22	2	0.15	339	0.0093	0.01051
GO:0071426	ribonucleoprotein complex export from nu...	124	4	0.83	351	0.00942	0.01172
GO:0009628	response to abiotic stimulus	1015	17	6.76	93	0.00983	0.00073
GO:0051881	regulation of mitochondrial membrane pot...	67	3	0.45	357	0.01008	0.01198
GO:0034109	homotypic cell-cell adhesion	67	3	0.45	358	0.01008	0.01198
GO:0034110	regulation of homotypic cell-cell adhesi...	23	2	0.15	347	0.01014	0.01146
GO:0010833	telomere maintenance via telomere length...	75	5	0.5	55	0.0104	0.00019
GO:0019725	cellular homeostasis	745	11	4.96	400	0.01044	0.01638
GO:0006091	generation of precursor metabolites and ...	452	8	3.01	393	0.01045	0.015
GO:0014812	muscle cell migration	68	3	0.45	370	0.01049	0.01247
GO:0009615	response to virus	280	6	1.87	392	0.01096	0.01469
GO:0002335	mature B cell differentiation	24	2	0.16	365	0.01101	0.01244
GO:0010613	positive regulation of cardiac muscle hy...	24	2	0.16	366	0.01101	0.01244
GO:0014742	positive regulation of muscle hypertroph...	24	2	0.16	367	0.01101	0.01244
GO:0006283	transcription-coupled nucleotide-excisio...	70	3	0.47	381	0.01135	0.01348
GO:0008334	histone mRNA metabolic process	25	2	0.17	377	0.01192	0.01346
GO:0097421	liver regeneration	25	2	0.17	378	0.01192	0.01346
GO:0033198	response to ATP	25	2	0.17	379	0.01192	0.01346
GO:1901699	cellular response to nitrogen compound	559	9	3.72	410	0.01203	0.01772
GO:0006446	regulation of translational initiation	72	3	0.48	389	0.01225	0.01454
GO:0071357	cellular response to type I interferon	72	3	0.48	390	0.01225	0.01454
GO:0060337	type I interferon signaling pathway	72	3	0.48	391	0.01225	0.01454
GO:1904357	negative regulation of telomere maintena...	26	2	0.17	385	0.01286	0.01452
GO:0032201	telomere maintenance via semi-conservati...	26	2	0.17	386	0.01286	0.01452
GO:0009147	pyrimidine nucleoside triphosphate metab...	20	3	0.13	68	0.01301	0.00036
GO:0006919	activation of cysteine-type endopeptidas...	75	3	0.5	399	0.01367	0.01621
GO:0009893	positive regulation of metabolic process	3108	37	20.7	75	0.01394	0.00044
GO:0034340	response to type I interferon	76	3	0.51	405	0.01417	0.01679
GO:1903313	positive regulation of mRNA metabolic pr...	76	3	0.51	406	0.01417	0.01679
GO:0001666	response to hypoxia	298	6	1.99	428	0.01454	0.01937
GO:0034614	cellular response to reactive oxygen spe...	141	4	0.94	416	0.01455	0.018
GO:0006335	DNA replication-dependent nucleosome ass...	28	2	0.19	401	0.01483	0.01673
GO:0071353	cellular response to interleukin-4	28	2	0.19	402	0.01483	0.01673
GO:0006294	nucleotide-excision repair preincision …	28	2	0.19	403	0.01483	0.01673
GO:0034723	DNA replication-dependent nucleosome org...	28	2	0.19	404	0.01483	0.01673
GO:0002682	regulation of immune system process	1226	15	8.17	471	0.01506	0.02576
GO:0048661	positive regulation of smooth muscle cel...	78	3	0.52	414	0.01519	0.01799
GO:1903426	regulation of reactive oxygen species bi...	78	3	0.52	415	0.01519	0.01799
GO:0007565	female pregnancy	144	4	0.96	427	0.01561	0.01929
GO:1900034	regulation of cellular response to heat	79	3	0.53	418	0.01571	0.01861
GO:0014070	response to organic cyclic compound	710	13	4.73	133	0.0158	0.00149
GO:0006298	mismatch repair	29	2	0.19	411	0.01586	0.01789
GO:0062197	cellular response to chemical stress	304	6	2.03	439	0.0159	0.02113
GO:0072593	reactive oxygen species metabolic proces...	221	5	1.47	436	0.01602	0.02055
GO:0006754	ATP biosynthetic process	48	4	0.32	69	0.01626	0.00037
GO:0010951	negative regulation of endopeptidase act...	147	4	0.98	437	0.01672	0.02064
GO:0021591	ventricular system development	30	2	0.2	421	0.01692	0.01908
GO:0070670	response to interleukin-4	30	2	0.2	422	0.01692	0.01908
GO:0032733	positive regulation of interleukin-10 pr...	30	2	0.2	423	0.01692	0.01908
GO:0071548	response to dexamethasone	30	2	0.2	424	0.01692	0.01908
GO:0036293	response to decreased oxygen levels	310	6	2.07	453	0.01734	0.023
GO:0071346	cellular response to interferon-gamma	149	4	0.99	446	0.01748	0.02156
GO:0006259	DNA metabolic process	834	20	5.56	4	0.01753	1.3e-06
GO:0010950	positive regulation of endopeptidase act...	150	4	1	447	0.01787	0.02204
GO:0010922	positive regulation of phosphatase activ...	31	2	0.21	432	0.01801	0.0203
GO:0031330	negative regulation of cellular cataboli...	228	5	1.52	454	0.01808	0.02315
GO:0010466	negative regulation of peptidase activit...	151	4	1.01	448	0.01827	0.02252
GO:0042113	B cell activation	230	5	1.53	456	0.01871	0.02393
GO:0046649	lymphocyte activation	604	9	4.02	488	0.01904	0.02758
GO:0051099	positive regulation of binding	153	4	1.02	455	0.01907	0.0235
GO:0000083	regulation of transcription involved in ...	32	2	0.21	442	0.01912	0.02156
GO:0061157	mRNA destabilization	32	2	0.21	443	0.01912	0.02156
GO:0002183	cytoplasmic translational initiation	32	2	0.21	444	0.01912	0.02156
GO:0051346	negative regulation of hydrolase activit...	320	6	2.13	473	0.01994	0.02636
GO:0032212	positive regulation of telomere maintena...	33	2	0.22	449	0.02027	0.02284
GO:0051973	positive regulation of telomerase activi...	33	2	0.22	450	0.02027	0.02284
GO:0014911	positive regulation of smooth muscle cel...	33	2	0.22	451	0.02027	0.02284
GO:0045861	negative regulation of proteolysis	236	5	1.57	474	0.02066	0.02637
GO:0071417	cellular response to organonitrogen comp...	512	8	3.41	494	0.0207	0.02905
GO:2000377	regulation of reactive oxygen species me...	157	4	1.05	470	0.02075	0.02553
GO:0031577	spindle checkpoint	34	2	0.23	457	0.02145	0.02416
GO:0050779	RNA destabilization	34	2	0.23	458	0.02145	0.02416
GO:0006409	tRNA export from nucleus	34	2	0.23	459	0.02145	0.02416
GO:0033574	response to testosterone	34	2	0.23	460	0.02145	0.02416
GO:0007094	mitotic spindle assembly checkpoint	34	2	0.23	461	0.02145	0.02416
GO:0071431	tRNA-containing ribonucleoprotein comple...	34	2	0.23	462	0.02145	0.02416
GO:0071173	spindle assembly checkpoint	34	2	0.23	463	0.02145	0.02416
GO:0071174	mitotic spindle checkpoint	34	2	0.23	464	0.02145	0.02416
GO:0031297	replication fork processing	34	2	0.23	465	0.02145	0.02416
GO:0043243	positive regulation of protein-containin...	34	2	0.23	466	0.02145	0.02416
GO:0044706	multi-multicellular organism process	160	4	1.07	484	0.02207	0.02712
GO:0032205	negative regulation of telomere maintena...	35	2	0.23	469	0.02265	0.02551
GO:0071824	protein-DNA complex subunit organization	228	8	1.52	59	0.02308	0.00021
GO:0070482	response to oxygen levels	332	6	2.21	510	0.0234	0.0308
GO:1902991	regulation of amyloid precursor protein ...	36	2	0.24	476	0.02388	0.02688
GO:0042307	positive regulation of protein import in...	36	2	0.24	477	0.02388	0.02688
GO:0051031	tRNA transport	36	2	0.24	478	0.02388	0.02688
GO:1904358	positive regulation of telomere maintena...	36	2	0.24	479	0.02388	0.02688
GO:1902100	negative regulation of metaphase/anaphas...	36	2	0.24	480	0.02388	0.02688
GO:0042220	response to cocaine	36	2	0.24	481	0.02388	0.02688
GO:0045841	negative regulation of mitotic metaphase...	36	2	0.24	482	0.02388	0.02688
GO:0050821	protein stabilization	164	4	1.09	495	0.0239	0.02934
GO:1903409	reactive oxygen species biosynthetic pro...	93	3	0.62	492	0.02413	0.02845
GO:1905819	negative regulation of chromosome separa...	37	2	0.25	489	0.02513	0.02829
GO:2000816	negative regulation of mitotic sister ch...	37	2	0.25	490	0.02513	0.02829
GO:0006626	protein targeting to mitochondrion	95	3	0.63	506	0.0255	0.03004
GO:0010952	positive regulation of peptidase activit...	168	4	1.12	518	0.02583	0.03166
GO:0035305	negative regulation of dephosphorylation	96	3	0.64	511	0.0262	0.03086
GO:0034404	nucleobase-containing small molecule bio...	96	3	0.64	512	0.0262	0.03086
GO:0009409	response to cold	38	2	0.25	497	0.02642	0.02973
GO:0030866	cortical actin cytoskeleton organization	38	2	0.25	498	0.02642	0.02973
GO:0045744	negative regulation of G protein-coupled...	38	2	0.25	499	0.02642	0.02973
GO:0097064	ncRNA export from nucleus	38	2	0.25	500	0.02642	0.02973
GO:0098760	response to interleukin-7	38	2	0.25	501	0.02642	0.02973
GO:0098761	cellular response to interleukin-7	38	2	0.25	502	0.02642	0.02973
GO:1904591	positive regulation of protein import	38	2	0.25	503	0.02642	0.02973
GO:0002520	immune system development	861	11	5.74	565	0.02757	0.0414
GO:0034080	CENP-A containing nucleosome assembly	39	2	0.26	514	0.02773	0.03119
GO:0061641	CENP-A containing chromatin organization	39	2	0.26	515	0.02773	0.03119
GO:0003723	RNA binding	1537	46	9.9	1	1e-11	1e-19
GO:0003729	mRNA binding	269	14	1.73	3	1.2e-05	4e-09
GO:0051082	unfolded protein binding	99	6	0.64	8	4.2e-05	6e-05
GO:0005515	protein binding	10921	88	70.35	11	5.2e-05	0.00037
GO:0003725	double-stranded RNA binding	70	5	0.45	9	8.6e-05	0.00012
GO:0042802	identical protein binding	1587	27	10.22	6	0.00012	5.4e-06
GO:0070840	dynein complex binding	22	3	0.14	12	0.00036	0.00044
GO:0003682	chromatin binding	512	11	3.3	13	0.00044	0.00076
GO:0003697	single-stranded DNA binding	107	5	0.69	14	0.00063	0.00084
GO:0008022	protein C-terminus binding	179	6	1.15	16	0.00104	0.00145
GO:0005524	ATP binding	1274	18	8.21	19	0.00112	0.0024
GO:0140097	catalytic activity acting on DNA	184	6	1.19	17	0.0012	0.00167
GO:0003730	mRNA 3'-UTR binding	82	4	0.53	20	0.00192	0.00243
GO:1990825	sequence-specific mRNA binding	11	2	0.07	21	0.00217	0.00247
GO:0016668	oxidoreductase activity acting on a sul…	11	2	0.07	22	0.00217	0.00247
GO:0042803	protein homodimerization activity	541	10	3.49	31	0.00247	0.00397
GO:0019904	protein domain specific binding	637	11	4.1	33	0.00256	0.00424
GO:0004866	endopeptidase inhibitor activity	92	4	0.59	27	0.00292	0.00369
GO:0003743	translation initiation factor activity	46	3	0.3	29	0.00321	0.00385
GO:0090079	translation regulator activity nucleic …	95	6	0.61	7	0.00353	4.8e-05
GO:0023026	MHC class II protein complex binding	16	2	0.1	37	0.00464	0.00527
GO:0019901	protein kinase binding	592	10	3.81	42	0.00469	0.00739
GO:0070182	DNA polymerase binding	19	2	0.12	43	0.00654	0.0074
GO:0016462	pyrophosphatase activity	735	11	4.73	46	0.00745	0.01191
GO:0043021	ribonucleoprotein complex binding	127	4	0.82	45	0.00912	0.01137
GO:0016853	isomerase activity	133	4	0.86	53	0.01068	0.01329
GO:0033218	amide binding	289	6	1.86	57	0.01086	0.01461
GO:0008266	poly(U) RNA binding	25	2	0.16	49	0.01118	0.01265
GO:0035925	mRNA 3'-UTR AU-rich region binding	25	2	0.16	50	0.01118	0.01265
GO:0042393	histone binding	210	5	1.35	58	0.01146	0.01484
GO:0017091	AU-rich element binding	26	2	0.17	56	0.01206	0.01364
GO:0017111	nucleoside-triphosphatase activity	688	10	4.43	67	0.01289	0.01959
GO:0008144	drug binding	76	3	0.49	59	0.01296	0.0154
GO:0045296	cadherin binding	304	6	1.96	64	0.01368	0.0183
GO:0008187	poly-pyrimidine tract binding	28	2	0.18	60	0.01391	0.01573
GO:0003727	single-stranded RNA binding	79	3	0.51	62	0.01437	0.01707
GO:0004386	helicase activity	149	4	0.96	66	0.01565	0.01938
GO:0016799	hydrolase activity hydrolyzing N-glycos…	30	2	0.19	63	0.01588	0.01794
GO:0051019	mitogen-activated protein kinase binding	31	2	0.2	65	0.0169	0.01909
GO:0000217	DNA secondary structure binding	32	2	0.21	68	0.01796	0.02027
GO:0004869	cysteine-type endopeptidase inhibitor ac...	34	2	0.22	69	0.02014	0.02273
GO:0042162	telomeric DNA binding	34	2	0.22	70	0.02014	0.02273
GO:0016922	nuclear receptor binding	90	3	0.58	71	0.02031	0.02403
GO:0003677	DNA binding	2021	24	13.02	34	0.02118	0.00436
GO:0051087	chaperone binding	94	3	0.61	73	0.02275	0.02689
GO:0004601	peroxidase activity	37	2	0.24	72	0.02362	0.02663
GO:0015036	disulfide oxidoreductase activity	38	2	0.24	74	0.02483	0.02798
GO:0030331	estrogen receptor binding	39	2	0.25	75	0.02606	0.02936
GO:0047485	protein N-terminus binding	100	3	0.64	76	0.0267	0.0315
GO:0016684	oxidoreductase activity acting on perox…	41	2	0.26	77	0.0286	0.03221
GO:0042826	histone deacetylase binding	104	3	0.67	79	0.02953	0.03479
GO:0016887	ATPase activity	365	6	2.35	83	0.03036	0.03979
GO:0005507	copper ion binding	43	2	0.28	80	0.03124	0.03516
GO:0048156	tau protein binding	45	2	0.29	81	0.03397	0.03821
GO:0005080	protein kinase C binding	45	2	0.29	82	0.03397	0.03821
GO:0019899	enzyme binding	2003	24	12.9	30	0.03631	0.00389
GO:0044325	ion channel binding	115	3	0.74	84	0.03808	0.04473
GO:0042562	hormone binding	52	2	0.33	85	0.0442	0.04963
GO:0043022	ribosome binding	54	2	0.35	86	0.04731	0.05309
GO:0035257	nuclear hormone receptor binding	130	3	0.84	87	0.05156	0.06028
GO:0019903	protein phosphatase binding	135	3	0.87	88	0.0565	0.06596
GO:0042277	peptide binding	228	4	1.47	92	0.05965	0.07204
GO:0003684	damaged DNA binding	62	2	0.4	91	0.06051	0.06775
GO:0001846	opsonin binding	10	1	0.06	89	0.0626	0.06665
GO:0032404	mismatch repair complex binding	10	1	0.06	90	0.0626	0.06665
GO:0016209	antioxidant activity	65	2	0.42	100	0.06574	0.07356
GO:0030295	protein kinase activator activity	66	2	0.43	101	0.06752	0.07552
GO:0001848	complement binding	11	1	0.07	93	0.06865	0.07307
GO:0060229	lipase activator activity	11	1	0.07	94	0.06865	0.07307
GO:0042975	peroxisome proliferator activated recept...	11	1	0.07	95	0.06865	0.07307
GO:0030955	potassium ion binding	11	1	0.07	96	0.06865	0.07307
GO:0001972	retinoic acid binding	11	1	0.07	97	0.06865	0.07307
GO:0016004	phospholipase activator activity	11	1	0.07	98	0.06865	0.07307
GO:0005078	MAP-kinase scaffold activity	11	1	0.07	99	0.06865	0.07307
GO:0031406	carboxylic acid binding	147	3	0.95	103	0.06924	0.08055
GO:0003712	transcription coregulator activity	450	6	2.9	118	0.07019	0.08943
GO:0051427	hormone receptor binding	149	3	0.96	104	0.07148	0.08311
GO:0008308	voltage-gated anion channel activity	12	1	0.08	102	0.07465	0.07944
GO:0003724	RNA helicase activity	70	2	0.45	105	0.07479	0.08357
GO:0046332	SMAD binding	71	2	0.46	106	0.07665	0.08562
GO:0019209	kinase activator activity	72	2	0.46	117	0.07852	0.08768
GO:0005501	retinoid binding	13	1	0.08	107	0.08062	0.08577
GO:0048185	activin binding	13	1	0.08	108	0.08062	0.08577
GO:0030983	mismatched DNA binding	13	1	0.08	109	0.08062	0.08577
GO:0008191	metalloendopeptidase inhibitor activity	13	1	0.08	110	0.08062	0.08577
GO:0034185	apolipoprotein binding	13	1	0.08	111	0.08062	0.08577
GO:0035613	RNA stem-loop binding	13	1	0.08	112	0.08062	0.08577
GO:0019104	DNA N-glycosylase activity	13	1	0.08	113	0.08062	0.08577
GO:0015037	peptide disulfide oxidoreductase activit...	13	1	0.08	114	0.08062	0.08577
GO:0003906	DNA-(apurinic or apyrimidinic site) endo...	13	1	0.08	115	0.08062	0.08577
GO:0008106	alcohol dehydrogenase (NADP+) activity	13	1	0.08	116	0.08062	0.08577
GO:0043177	organic acid binding	158	3	1.02	128	0.08196	0.09504
GO:0035258	steroid hormone receptor binding	74	2	0.48	119	0.0823	0.09186
GO:0046914	transition metal ion binding	826	9	5.32	149	0.08403	0.11387
GO:0019887	protein kinase regulator activity	161	3	1.04	136	0.08559	0.09917
GO:0046965	retinoid X receptor binding	14	1	0.09	120	0.08654	0.09206
GO:0044548	S100 protein binding	14	1	0.09	121	0.08654	0.09206
GO:0005324	long-chain fatty acid transporter activi...	14	1	0.09	122	0.08654	0.09206
GO:0017070	U6 snRNA binding	14	1	0.09	123	0.08654	0.09206
GO:0005095	GTPase inhibitor activity	14	1	0.09	124	0.08654	0.09206
GO:0030296	protein tyrosine kinase activator activi...	14	1	0.09	125	0.08654	0.09206
GO:0019840	isoprenoid binding	14	1	0.09	126	0.08654	0.09206
GO:0070122	isopeptidase activity	14	1	0.09	127	0.08654	0.09206
GO:0050839	cell adhesion molecule binding	477	6	3.07	140	0.08722	0.11015
GO:0022829	wide pore channel activity	15	1	0.1	129	0.09243	0.0983
GO:0031681	G-protein beta-subunit binding	15	1	0.1	130	0.09243	0.0983
GO:0032183	SUMO binding	15	1	0.1	131	0.09243	0.0983
GO:0005521	lamin binding	15	1	0.1	132	0.09243	0.0983
GO:0000900	translation repressor activity mRNA reg…	15	1	0.1	133	0.09243	0.0983
GO:0031420	alkali metal ion binding	15	1	0.1	134	0.09243	0.0983
GO:0005540	hyaluronic acid binding	15	1	0.1	135	0.09243	0.0983
GO:0005198	structural molecule activity	485	6	3.12	150	0.09267	0.11673
GO:0004550	nucleoside diphosphate kinase activity	16	1	0.1	137	0.09829	0.10451
GO:0005092	GDP-dissociation inhibitor activity	16	1	0.1	138	0.09829	0.10451
GO:1990404	protein ADP-ribosylase activity	16	1	0.1	139	0.09829	0.10451
GO:0000339	RNA cap binding	17	1	0.11	141	0.1041	0.11067
GO:0003746	translation elongation factor activity	17	1	0.11	142	0.1041	0.11067
GO:0046933	proton-transporting ATP synthase activit...	17	1	0.11	143	0.1041	0.11067
GO:0043024	ribosomal small subunit binding	17	1	0.11	144	0.1041	0.11067
GO:0016864	intramolecular oxidoreductase activity …	17	1	0.11	145	0.1041	0.11067
GO:0017049	GTP-Rho binding	17	1	0.11	146	0.1041	0.11067
GO:0050750	low-density lipoprotein particle recepto...	17	1	0.11	147	0.1041	0.11067
GO:0003756	protein disulfide isomerase activity	17	1	0.11	148	0.1041	0.11067
GO:0019902	phosphatase binding	177	3	1.14	155	0.10608	0.12235
GO:0042605	peptide antigen binding	18	1	0.12	151	0.10988	0.11679
GO:0070034	telomerase RNA binding	18	1	0.12	152	0.10988	0.11679
GO:0015252	proton channel activity	18	1	0.12	153	0.10988	0.11679
GO:0000287	magnesium ion binding	183	3	1.18	170	0.11422	0.13151
GO:0046961	proton-transporting ATPase activity rot…	19	1	0.12	156	0.11562	0.12286
GO:0044769	ATPase activity coupled to transmembran…	19	1	0.12	157	0.11562	0.12286
GO:0048019	receptor antagonist activity	19	1	0.12	158	0.11562	0.12286
GO:0001530	lipopolysaccharide binding	19	1	0.12	159	0.11562	0.12286
GO:0042288	MHC class I protein binding	19	1	0.12	160	0.11562	0.12286
GO:0004033	aldo-keto reductase (NADP) activity	19	1	0.12	161	0.11562	0.12286
GO:0009055	electron transfer activity	92	2	0.59	171	0.1186	0.13176
GO:0008270	zinc ion binding	641	7	4.13	192	0.11898	0.15151
GO:0005319	lipid transporter activity	93	2	0.6	172	0.12073	0.13408
GO:0019207	kinase regulator activity	188	3	1.21	180	0.12118	0.13933
GO:0120014	phospholipid transfer activity	20	1	0.13	163	0.12133	0.1289
GO:0070412	R-SMAD binding	20	1	0.13	164	0.12133	0.1289
GO:0008327	methyl-CpG binding	20	1	0.13	165	0.12133	0.1289
GO:0042056	chemoattractant activity	20	1	0.13	166	0.12133	0.1289
GO:0070325	lipoprotein particle receptor binding	20	1	0.13	167	0.12133	0.1289
GO:0031690	adrenergic receptor binding	20	1	0.13	168	0.12133	0.1289
GO:0004435	phosphatidylinositol phospholipase C act...	20	1	0.13	169	0.12133	0.1289
GO:0016676	oxidoreductase activity acting on a hem…	21	1	0.14	173	0.127	0.13489
GO:0071813	lipoprotein particle binding	21	1	0.14	174	0.127	0.13489
GO:0071814	protein-lipid complex binding	21	1	0.14	175	0.127	0.13489
GO:0004629	phospholipase C activity	21	1	0.14	176	0.127	0.13489
GO:0043027	cysteine-type endopeptidase inhibitor ac...	21	1	0.14	177	0.127	0.13489
GO:0004129	cytochrome-c oxidase activity	21	1	0.14	178	0.127	0.13489
GO:0015002	heme-copper terminal oxidase activity	21	1	0.14	179	0.127	0.13489
GO:0015078	proton transmembrane transporter activit...	98	2	0.63	188	0.13147	0.14582
GO:0043236	laminin binding	22	1	0.14	181	0.13263	0.14085
GO:0016675	oxidoreductase activity acting on a hem…	22	1	0.14	182	0.13263	0.14085
GO:0042974	retinoic acid receptor binding	22	1	0.14	183	0.13263	0.14085
GO:0050321	tau-protein kinase activity	22	1	0.14	184	0.13263	0.14085
GO:0003688	DNA replication origin binding	22	1	0.14	185	0.13263	0.14085
GO:0003950	NAD+ ADP-ribosyltransferase activity	22	1	0.14	186	0.13263	0.14085
GO:0005160	transforming growth factor beta receptor...	22	1	0.14	187	0.13263	0.14085
GO:0016798	hydrolase activity acting on glycosyl b…	99	2	0.64	190	0.13364	0.14819
GO:0008094	DNA-dependent ATPase activity	99	2	0.64	191	0.13364	0.14819
GO:0005504	fatty acid binding	23	1	0.15	189	0.13822	0.14676
GO:0035035	histone acetyltransferase binding	24	1	0.15	193	0.14379	0.15263
GO:0043325	phosphatidylinositol-34-bisphosphate bi…	24	1	0.15	194	0.14379	0.15263
GO:0044183	protein folding chaperone	24	1	0.15	195	0.14379	0.15263
GO:0002020	protease binding	104	2	0.67	198	0.14463	0.16017
GO:0008134	transcription factor binding	553	6	3.56	206	0.14611	0.18016
GO:0017056	structural constituent of nuclear pore	25	1	0.16	196	0.14931	0.15846
GO:0030371	translation repressor activity	25	1	0.16	197	0.14931	0.15846
GO:0016620	oxidoreductase activity acting on the a…	26	1	0.17	199	0.1548	0.16426
GO:0048027	mRNA 5'-UTR binding	26	1	0.17	200	0.1548	0.16426
GO:0030547	receptor inhibitor activity	26	1	0.17	201	0.1548	0.16426
GO:0008157	protein phosphatase 1 binding	26	1	0.17	202	0.1548	0.16426
GO:0009678	pyrophosphate hydrolysis-driven proton t...	26	1	0.17	203	0.1548	0.16426
GO:0005525	GTP binding	324	4	2.09	210	0.15634	0.18348
GO:0048020	CCR chemokine receptor binding	27	1	0.17	204	0.16026	0.17001
GO:0032550	purine ribonucleoside binding	328	4	2.11	213	0.16122	0.189
GO:0015631	tubulin binding	330	4	2.13	215	0.16369	0.19178
GO:0032549	ribonucleoside binding	331	4	2.13	217	0.16493	0.19317
GO:0001883	purine nucleoside binding	331	4	2.13	218	0.16493	0.19317
GO:0043015	gamma-tubulin binding	28	1	0.18	205	0.16568	0.17572
GO:0044877	protein-containing complex binding	1078	17	6.94	15	0.16643	0.00099
GO:0017046	peptide hormone binding	29	1	0.19	208	0.17106	0.1814
GO:0097718	disordered domain specific binding	29	1	0.19	209	0.17106	0.1814
GO:0001882	nucleoside binding	336	4	2.16	222	0.17117	0.2002
GO:0031072	heat shock protein binding	116	2	0.75	214	0.17171	0.18959
GO:0019001	guanyl nucleotide binding	339	4	2.18	224	0.17496	0.20445
GO:0032561	guanyl ribonucleotide binding	339	4	2.18	225	0.17496	0.20445
GO:0008009	chemokine activity	30	1	0.19	212	0.17641	0.18704
GO:0008135	translation factor activity RNA binding	77	4	0.5	18	0.17675	0.00193
GO:0036094	small molecule binding	2090	25	13.46	25	0.17882	0.00322
GO:0003755	peptidyl-prolyl cis-trans isomerase acti...	31	1	0.2	216	0.18173	0.19263
GO:0008092	cytoskeletal protein binding	854	8	5.5	237	0.18411	0.2326
GO:0043539	protein serine/threonine kinase activato...	32	1	0.21	219	0.18701	0.19819
GO:0016903	oxidoreductase activity acting on the a…	32	1	0.21	220	0.18701	0.19819
GO:0042287	MHC protein binding	32	1	0.21	221	0.18701	0.19819
GO:0016859	cis-trans isomerase activity	33	1	0.21	223	0.19226	0.20372
GO:0120013	lipid transfer activity	34	1	0.22	226	0.19748	0.2092
GO:0008536	Ran GTPase binding	34	1	0.22	227	0.19748	0.2092
