# Supplementary material for: Analysis of Cellular Heterogeneity in Immune Microenvironment of Primary Central Nervous System Lymphoma by Single-Cell Sequencing
Source: Front Oncol. 2021 Oct 4;11:683007. doi: 10.3389/fonc.2021.683007 (PMC8523033; doi:10.3389/fonc.2021.683007)
Supplement: Supplementary file 6 [file Table_6.xlsx]

## Sheet: cDC
Supplementary Table 6. Dendritic cell recluster GO results -- cDC
GO.ID	Term	Annotated	Significant	Expected	Rank in Fisher.classic	Fisher.elim	Fisher.classic
GO:0016032	viral process	847	18	6.26	33	4.3e-05	8.4e-05
GO:0010389	regulation of G2/M transition of mitotic...	185	8	1.37	37	6.7e-05	9.5e-05
GO:1901224	positive regulation of NIK/NF-kappaB sig...	70	5	0.52	49	0.00017	0.00021
GO:0031145	anaphase-promoting complex-dependent cat...	80	5	0.59	61	0.00031	0.00039
GO:0051707	response to other organism	1056	21	7.81	22	0.00044	5.2e-05
GO:0006309	apoptotic DNA fragmentation	21	3	0.16	70	0.00047	0.00055
GO:0065004	protein-DNA complex assembly	197	7	1.46	81	0.00064	0.00085
GO:0006851	mitochondrial calcium ion transmembrane ...	24	3	0.18	80	0.00071	0.00082
GO:0015949	nucleobase-containing small molecule int...	25	3	0.18	82	0.0008	0.00092
GO:0071353	cellular response to interleukin-4	28	3	0.21	97	0.00112	0.00129
GO:0006298	mismatch repair	29	3	0.21	103	0.00125	0.00143
GO:0033144	negative regulation of intracellular ste...	31	3	0.23	113	0.00152	0.00174
GO:0051604	protein maturation	230	7	1.7	122	0.00158	0.00208
GO:0010634	positive regulation of epithelial cell m...	117	5	0.87	125	0.00174	0.00216
GO:0050851	antigen receptor-mediated signaling path...	237	7	1.75	130	0.00187	0.00246
GO:0051301	cell division	542	11	4.01	141	0.00218	0.00319
GO:0034622	cellular protein-containing complex asse...	952	20	7.04	15	0.00219	3.7e-05
GO:0009162	deoxyribonucleoside monophosphate metabo...	10	2	0.07	132	0.00234	0.00258
GO:0070317	negative regulation of G0 to G1 transiti...	36	3	0.27	134	0.00235	0.00269
GO:0043281	regulation of cysteine-type endopeptidas...	184	6	1.36	139	0.00242	0.00309
GO:0071897	DNA biosynthetic process	168	8	1.24	20	0.00245	4.8e-05
GO:2000816	negative regulation of mitotic sister ch...	37	3	0.27	135	0.00254	0.00291
GO:0019985	translesion synthesis	38	3	0.28	140	0.00274	0.00315
GO:0009636	response to toxic substance	190	6	1.4	151	0.00284	0.00361
GO:0000380	alternative mRNA splicing via spliceoso…	81	4	0.6	150	0.00303	0.00361
GO:0043312	neutrophil degranulation	406	9	3	166	0.00311	0.00429
GO:0002262	myeloid cell homeostasis	134	5	0.99	158	0.00315	0.00387
GO:0019725	cellular homeostasis	745	13	5.51	179	0.00328	0.00499
GO:0009265	2'-deoxyribonucleotide biosynthetic proc...	12	2	0.09	155	0.0034	0.00374
GO:0000956	nuclear-transcribed mRNA catabolic proce...	201	6	1.49	175	0.00375	0.00475
GO:0042921	glucocorticoid receptor signaling pathwa...	13	2	0.1	168	0.004	0.0044
GO:0021854	hypothalamus development	13	2	0.1	169	0.004	0.0044
GO:0033151	V(D)J recombination	13	2	0.1	170	0.004	0.0044
GO:0051204	protein insertion into mitochondrial mem...	44	3	0.33	176	0.00417	0.00477
GO:0000723	telomere maintenance	146	5	1.08	187	0.00454	0.00556
GO:0006412	translation	598	11	4.42	208	0.00461	0.00664
GO:0009130	pyrimidine nucleoside monophosphate bios...	14	2	0.1	183	0.00465	0.00511
GO:0097711	ciliary basal body-plasma membrane docki...	92	4	0.68	189	0.00478	0.00567
GO:0002223	stimulatory C-type lectin receptor signa...	92	4	0.68	190	0.00478	0.00567
GO:0046649	lymphocyte activation	604	11	4.47	217	0.00497	0.00714
GO:0006614	SRP-dependent cotranslational protein ta...	94	4	0.7	201	0.00516	0.00612
GO:0033599	regulation of mammary gland epithelial c...	15	2	0.11	191	0.00534	0.00586
GO:0071157	negative regulation of cell cycle arrest	15	2	0.11	192	0.00534	0.00586
GO:0023035	CD40 signaling pathway	15	2	0.11	193	0.00534	0.00586
GO:0032048	cardiolipin metabolic process	15	2	0.11	194	0.00534	0.00586
GO:1901991	negative regulation of mitotic cell cycl...	218	6	1.61	214	0.00556	0.00701
GO:0051172	negative regulation of nitrogen compound...	2023	25	14.96	260	0.00574	0.01085
GO:0007096	regulation of exit from mitosis	16	2	0.12	209	0.00607	0.00667
GO:0002418	immune response to tumor cell	16	2	0.12	210	0.00607	0.00667
GO:0007062	sister chromatid cohesion	51	3	0.38	218	0.00632	0.00722
GO:0006974	cellular response to DNA damage stimulus	806	16	5.96	66	0.00642	0.00046
GO:0042493	response to drug	298	7	2.2	232	0.00658	0.0085
GO:0009200	deoxyribonucleoside triphosphate metabol...	17	2	0.13	220	0.00685	0.00752
GO:0006266	DNA ligation	17	2	0.13	221	0.00685	0.00752
GO:0002478	antigen processing and presentation of e...	162	5	1.2	233	0.00701	0.00855
GO:0050821	protein stabilization	164	5	1.21	238	0.00737	0.00899
GO:0034097	response to cytokine	972	17	7.19	95	0.00741	0.00127
GO:0045814	negative regulation of gene expression …	105	4	0.78	239	0.00761	0.00899
GO:0048024	regulation of mRNA splicing via spliceo…	105	4	0.78	240	0.00761	0.00899
GO:0009219	pyrimidine deoxyribonucleotide metabolic...	18	2	0.13	230	0.00767	0.00842
GO:0006271	DNA strand elongation involved in DNA re...	18	2	0.13	231	0.00767	0.00842
GO:2001235	positive regulation of apoptotic signali...	166	5	1.23	244	0.00775	0.00944
GO:0030071	regulation of mitotic metaphase/anaphase...	55	3	0.41	236	0.00779	0.00889
GO:0000082	G1/S transition of mitotic cell cycle	235	6	1.74	252	0.00793	0.00995
GO:0001906	cell killing	107	4	0.79	246	0.00813	0.0096
GO:0031324	negative regulation of cellular metaboli...	2192	26	16.21	304	0.00819	0.01544
GO:0031100	animal organ regeneration	57	3	0.42	248	0.0086	0.00981
GO:0016070	RNA metabolic process	3908	46	28.9	77	0.00891	0.00078
GO:0033260	nuclear DNA replication	58	3	0.43	254	0.00902	0.01029
GO:0010155	regulation of proton transport	20	2	0.15	256	0.00943	0.01035
GO:0009147	pyrimidine nucleoside triphosphate metab...	20	2	0.15	257	0.00943	0.01035
GO:0006297	nucleotide-excision repair DNA gap fill…	20	2	0.15	258	0.00943	0.01035
GO:0002407	dendritic cell chemotaxis	20	2	0.15	259	0.00943	0.01035
GO:0090068	positive regulation of cell cycle proces...	247	6	1.83	275	0.01	0.0125
GO:0051497	negative regulation of stress fiber asse...	21	2	0.16	264	0.01037	0.01138
GO:0031327	negative regulation of cellular biosynth...	1365	18	10.09	324	0.01072	0.01726
GO:0000184	nuclear-transcribed mRNA catabolic proce...	116	4	0.86	276	0.01072	0.01263
GO:0006342	chromatin silencing	62	3	0.46	268	0.01082	0.01233
GO:0002253	activation of immune response	386	12	2.85	17	0.01084	4.4e-05
GO:0022618	ribonucleoprotein complex assembly	181	5	1.34	278	0.01101	0.01336
GO:0010605	negative regulation of macromolecule met...	2510	34	18.56	67	0.01111	0.00047
GO:0051054	positive regulation of DNA metabolic pro...	182	5	1.35	286	0.01125	0.01366
GO:0050852	T cell receptor signaling pathway	182	5	1.35	287	0.01125	0.01366
GO:0070584	mitochondrion morphogenesis	22	2	0.16	270	0.01136	0.01245
GO:0007063	regulation of sister chromatid cohesion	22	2	0.16	271	0.01136	0.01245
GO:0048025	negative regulation of mRNA splicing vi…	22	2	0.16	272	0.01136	0.01245
GO:0032069	regulation of nuclease activity	22	2	0.16	273	0.01136	0.01245
GO:0098542	defense response to other organism	795	15	5.88	90	0.01153	0.00119
GO:0070482	response to oxygen levels	332	7	2.45	298	0.01153	0.01476
GO:0097549	chromatin organization involved in negat...	119	4	0.88	288	0.01169	0.01377
GO:0022613	ribonucleoprotein complex biogenesis	418	8	3.09	311	0.01222	0.016
GO:1904666	regulation of ubiquitin protein ligase a...	23	2	0.17	281	0.01238	0.01357
GO:0048261	negative regulation of receptor-mediated...	23	2	0.17	282	0.01238	0.01357
GO:0007202	activation of phospholipase C activity	23	2	0.17	283	0.01238	0.01357
GO:0039529	RIG-I signaling pathway	23	2	0.17	284	0.01238	0.01357
GO:0072538	T-helper 17 type immune response	23	2	0.17	285	0.01238	0.01357
GO:0010608	posttranscriptional regulation of gene e...	595	10	4.4	317	0.01249	0.0171
GO:0030705	cytoskeleton-dependent intracellular tra...	187	5	1.38	301	0.01254	0.0152
GO:0033045	regulation of sister chromatid segregati...	80	6	0.59	14	0.01254	3.6e-05
GO:0009890	negative regulation of biosynthetic proc...	1388	18	10.26	341	0.0126	0.02013
GO:0071826	ribonucleoprotein complex subunit organi...	188	5	1.39	305	0.01281	0.01552
GO:0051881	regulation of mitochondrial membrane pot...	67	3	0.5	300	0.01335	0.01519
GO:0001773	myeloid dendritic cell activation	24	2	0.18	293	0.01344	0.01473
GO:0032232	negative regulation of actin filament bu...	24	2	0.18	294	0.01344	0.01473
GO:0060191	regulation of lipase activity	68	3	0.5	307	0.0139	0.01581
GO:0006119	oxidative phosphorylation	126	4	0.93	314	0.01418	0.01666
GO:0097421	liver regeneration	25	2	0.18	308	0.01454	0.01593
GO:0000724	double-strand break repair via homologou...	128	4	0.95	327	0.01494	0.01755
GO:0000381	regulation of alternative mRNA splicing…	71	3	0.52	328	0.0156	0.01773
GO:0002479	antigen processing and presentation of e...	71	3	0.52	329	0.0156	0.01773
GO:0043154	negative regulation of cysteine-type end...	71	3	0.52	330	0.0156	0.01773
GO:0008053	mitochondrial fusion	26	2	0.19	319	0.01567	0.01717
GO:0031640	killing of cells of other organism	26	2	0.19	320	0.01567	0.01717
GO:0032201	telomere maintenance via semi-conservati...	26	2	0.19	321	0.01567	0.01717
GO:0033119	negative regulation of RNA splicing	26	2	0.19	322	0.01567	0.01717
GO:0000725	recombinational repair	130	4	0.96	332	0.01573	0.01847
GO:0008284	positive regulation of cell population p...	711	11	5.26	357	0.0158	0.02192
GO:0002218	activation of innate immune response	119	6	0.88	58	0.01581	0.00032
GO:0010558	negative regulation of macromolecule bio...	1318	17	9.75	373	0.01609	0.02495
GO:0002250	adaptive immune response	355	7	2.62	345	0.01615	0.02052
GO:0051253	negative regulation of RNA metabolic pro...	1214	16	8.98	372	0.01619	0.02467
GO:0034401	chromatin organization involved in regul...	132	4	0.98	336	0.01655	0.01942
GO:0009889	regulation of biosynthetic process	3508	36	25.94	441	0.01661	0.03503
GO:0009142	nucleoside triphosphate biosynthetic pro...	73	3	0.54	334	0.0168	0.01908
GO:0006457	protein folding	202	5	1.49	344	0.01699	0.02051
GO:0009628	response to abiotic stimulus	1015	14	7.5	374	0.01703	0.02496
GO:0010629	negative regulation of gene expression	1870	28	13.83	60	0.01735	0.00036
GO:0009615	response to virus	280	6	2.07	355	0.01762	0.02182
GO:1901992	positive regulation of mitotic cell cycl...	75	3	0.55	343	0.01804	0.02049
GO:0048384	retinoic acid receptor signaling pathway	28	2	0.21	340	0.01806	0.01977
GO:0045089	positive regulation of innate immune res...	170	7	1.26	59	0.01831	0.00035
GO:2000117	negative regulation of cysteine-type end...	76	3	0.56	351	0.01869	0.02121
GO:0042590	antigen processing and presentation of e...	76	3	0.56	352	0.01869	0.02121
GO:1903507	negative regulation of nucleic acid-temp...	1130	15	8.36	396	0.01869	0.02778
GO:1902679	negative regulation of RNA biosynthetic ...	1131	15	8.36	397	0.01882	0.02797
GO:0045931	positive regulation of mitotic cell cycl...	138	4	1.02	360	0.01916	0.02244
GO:1900117	regulation of execution phase of apoptos...	29	2	0.21	346	0.0193	0.02113
GO:0039528	cytoplasmic pattern recognition receptor...	29	2	0.21	347	0.0193	0.02113
GO:0006221	pyrimidine nucleotide biosynthetic proce...	29	2	0.21	348	0.0193	0.02113
GO:0001844	protein insertion into mitochondrial mem...	29	2	0.21	349	0.0193	0.02113
GO:0045648	positive regulation of erythrocyte diffe...	29	2	0.21	350	0.0193	0.02113
GO:0010595	positive regulation of endothelial cell ...	77	3	0.57	358	0.01934	0.02195
GO:1903725	regulation of phospholipid metabolic pro...	78	3	0.58	363	0.02001	0.0227
GO:0006396	RNA processing	884	16	6.54	94	0.02011	0.00125
GO:0031326	regulation of cellular biosynthetic proc...	3435	35	25.4	477	0.02054	0.04177
GO:0001893	maternal placenta development	30	2	0.22	361	0.02058	0.02253
GO:1900034	regulation of cellular response to heat	79	3	0.58	366	0.02069	0.02347
GO:0070887	cellular response to chemical stimulus	2621	33	19.38	124	0.02115	0.00215
GO:0098869	cellular oxidant detoxification	80	3	0.59	371	0.02138	0.02425
GO:0033048	negative regulation of mitotic sister ch...	40	4	0.3	50	0.02143	0.00025
GO:0009263	deoxyribonucleotide biosynthetic process	15	3	0.11	47	0.02161	0.00019
GO:0006376	mRNA splice site selection	31	2	0.23	367	0.0219	0.02396
GO:0050829	defense response to Gram-negative bacter...	31	2	0.23	368	0.0219	0.02396
GO:0050686	negative regulation of mRNA processing	31	2	0.23	369	0.0219	0.02396
GO:0006739	NADP metabolic process	31	2	0.23	370	0.0219	0.02396
GO:0007565	female pregnancy	144	4	1.06	386	0.02202	0.02574
GO:0001909	leukocyte mediated cytotoxicity	81	3	0.6	375	0.02209	0.02504
GO:0060218	hematopoietic stem cell differentiation	81	3	0.6	376	0.02209	0.02504
GO:0035710	CD4-positive alpha-beta T cell activati…	81	3	0.6	377	0.02209	0.02504
GO:0008219	cell death	1769	25	13.08	117	0.02242	0.00187
GO:0008380	RNA splicing	423	11	3.13	64	0.02247	0.00044
GO:0071103	DNA conformation change	297	6	2.2	398	0.0228	0.02809
GO:0042775	mitochondrial ATP synthesis coupled elec...	82	3	0.61	387	0.02281	0.02585
GO:0071345	cellular response to cytokine stimulus	905	15	6.69	164	0.02311	0.00415
GO:0001666	response to hypoxia	298	6	2.2	409	0.02313	0.02849
GO:0000083	regulation of transcription involved in ...	32	2	0.24	380	0.02325	0.02543
GO:0045292	mRNA cis splicing via spliceosome	32	2	0.24	381	0.02325	0.02543
GO:0072529	pyrimidine-containing compound catabolic...	32	2	0.24	382	0.02325	0.02543
GO:0060443	mammary gland morphogenesis	32	2	0.24	383	0.02325	0.02543
GO:0010951	negative regulation of endopeptidase act...	147	4	1.09	393	0.02354	0.0275
GO:0042773	ATP synthesis coupled electron transport	83	3	0.61	389	0.02354	0.02667
GO:0002456	T cell mediated immunity	84	3	0.62	394	0.02428	0.02751
GO:0002449	lymphocyte mediated immunity	222	5	1.64	410	0.02441	0.02929
GO:2000113	negative regulation of cellular macromol...	1275	16	9.43	446	0.02453	0.0366
GO:0039694	viral RNA genome replication	33	2	0.24	390	0.02463	0.02694
GO:0042769	DNA damage response detection of DNA da…	33	2	0.24	391	0.02463	0.02694
GO:0043928	exonucleolytic catabolism of deadenylate...	33	2	0.24	392	0.02463	0.02694
GO:0010950	positive regulation of endopeptidase act...	150	4	1.11	411	0.02512	0.02932
GO:0010466	negative regulation of peptidase activit...	151	4	1.12	412	0.02566	0.02994
GO:0043254	regulation of protein-containing complex...	391	7	2.89	428	0.0258	0.03245
GO:0031577	spindle checkpoint	34	2	0.25	401	0.02604	0.02848
GO:1901030	positive regulation of mitochondrial out...	34	2	0.25	402	0.02604	0.02848
GO:0033574	response to testosterone	34	2	0.25	403	0.02604	0.02848
GO:0006296	nucleotide-excision repair DNA incision…	34	2	0.25	404	0.02604	0.02848
GO:0007094	mitotic spindle assembly checkpoint	34	2	0.25	405	0.02604	0.02848
GO:0010863	positive regulation of phospholipase C a...	34	2	0.25	406	0.02604	0.02848
GO:0071173	spindle assembly checkpoint	34	2	0.25	407	0.02604	0.02848
GO:0071174	mitotic spindle checkpoint	34	2	0.25	408	0.02604	0.02848
GO:0031334	positive regulation of protein-containin...	226	5	1.67	420	0.02611	0.0313
GO:0048609	multicellular organismal reproductive pr...	578	9	4.27	443	0.02713	0.03554
GO:1990748	cellular detoxification	88	3	0.65	418	0.02738	0.03099
GO:1901989	positive regulation of cell cycle phase ...	88	3	0.65	419	0.02738	0.03099
GO:0036293	response to decreased oxygen levels	310	6	2.29	433	0.02739	0.03362
GO:0097028	dendritic cell differentiation	35	2	0.26	413	0.02749	0.03005
GO:0033683	nucleotide-excision repair DNA incision	35	2	0.26	414	0.02749	0.03005
GO:0000413	protein peptidyl-prolyl isomerization	35	2	0.26	415	0.02749	0.03005
GO:0000291	nuclear-transcribed mRNA catabolic proce...	35	2	0.26	416	0.02749	0.03005
GO:0042113	B cell activation	230	5	1.7	432	0.02789	0.03339
GO:0033209	tumor necrosis factor-mediated signaling...	155	4	1.15	429	0.0279	0.03252
GO:0019222	regulation of metabolic process	5700	61	42.14	74	0.02826	0.00071
GO:0003723	RNA binding	1537	40	11.22	1	3.6e-10	1e-12
GO:0003729	mRNA binding	269	10	1.96	3	0.00052	4.4e-05
GO:0046982	protein heterodimerization activity	264	8	1.93	7	0.00069	0.001
GO:0003735	structural constituent of ribosome	149	6	1.09	8	0.00077	0.001
GO:0042802	identical protein binding	1587	23	11.59	15	0.00092	0.0021
GO:0042826	histone deacetylase binding	104	5	0.76	10	0.00098	0.0013
GO:0003684	damaged DNA binding	62	4	0.45	12	0.00108	0.0013
GO:0003697	single-stranded DNA binding	107	5	0.78	13	0.00111	0.0014
GO:0005200	structural constituent of cytoskeleton	73	4	0.53	17	0.00198	0.0024
GO:0008022	protein C-terminus binding	179	6	1.31	19	0.00198	0.0026
GO:0001846	opsonin binding	10	2	0.07	18	0.00229	0.0026
GO:0008144	drug binding	76	4	0.55	20	0.0023	0.0028
GO:0004601	peroxidase activity	37	3	0.27	21	0.00245	0.0029
GO:1990825	sequence-specific mRNA binding	11	2	0.08	22	0.00278	0.0031
GO:0001848	complement binding	11	2	0.08	23	0.00278	0.0031
GO:0008301	DNA binding bending	11	2	0.08	24	0.00278	0.0031
GO:0016668	oxidoreductase activity acting on a sul…	11	2	0.08	25	0.00278	0.0031
GO:0031625	ubiquitin protein ligase binding	283	7	2.07	27	0.00467	0.0064
GO:0033218	amide binding	289	7	2.11	29	0.00523	0.0071
GO:0023026	MHC class II protein complex binding	16	2	0.12	28	0.00593	0.0066
GO:0051082	unfolded protein binding	99	4	0.72	31	0.00593	0.0072
GO:0016655	oxidoreductase activity acting on NAD(P…	51	3	0.37	30	0.0061	0.0071
GO:0000400	four-way junction DNA binding	17	2	0.12	32	0.00668	0.0075
GO:0070182	DNA polymerase binding	19	2	0.14	33	0.00832	0.0093
GO:0042056	chemoattractant activity	20	2	0.15	34	0.00921	0.0103
GO:0005178	integrin binding	118	4	0.86	35	0.01089	0.0132
GO:0005515	protein binding	10921	93	79.73	41	0.01206	0.0251
GO:0061134	peptidase regulator activity	132	4	0.96	38	0.01588	0.0192
GO:0042803	protein homodimerization activity	541	9	3.95	40	0.01731	0.0242
GO:0019904	protein domain specific binding	637	10	4.65	43	0.01782	0.0255
GO:0008134	transcription factor binding	553	9	4.04	45	0.01967	0.0273
GO:0003755	peptidyl-prolyl cis-trans isomerase acti...	31	2	0.23	39	0.02139	0.0238
GO:0050839	cell adhesion molecule binding	477	8	3.48	47	0.02333	0.0315
GO:0016859	cis-trans isomerase activity	33	2	0.24	44	0.02406	0.0268
GO:0004869	cysteine-type endopeptidase inhibitor ac...	34	2	0.25	46	0.02544	0.0283
GO:0003954	NADH dehydrogenase activity	38	2	0.28	48	0.03129	0.0347
GO:0008137	NADH dehydrogenase (ubiquinone) activity	38	2	0.28	49	0.03129	0.0347
GO:0043028	cysteine-type endopeptidase regulator ac...	38	2	0.28	50	0.03129	0.0347
GO:0050136	NADH dehydrogenase (quinone) activity	38	2	0.28	51	0.03129	0.0347
GO:0005506	iron ion binding	95	3	0.69	55	0.03226	0.0373
GO:0016504	peptidase activator activity	39	2	0.28	53	0.03283	0.0364
GO:0061631	ubiquitin conjugating enzyme activity	39	2	0.28	54	0.03283	0.0364
GO:0061650	ubiquitin-like protein conjugating enzym...	41	2	0.3	57	0.03599	0.0399
GO:0001882	nucleoside binding	336	6	2.45	60	0.03642	0.046
GO:0061135	endopeptidase regulator activity	100	3	0.73	58	0.03672	0.0424
GO:0047485	protein N-terminus binding	100	3	0.73	59	0.03672	0.0424
GO:0019899	enzyme binding	2003	28	14.62	9	0.03793	0.0011
GO:0003924	GTPase activity	281	5	2.05	62	0.05487	0.0668
GO:0042562	hormone binding	52	2	0.38	61	0.05528	0.0612
GO:0097110	scaffold protein binding	56	2	0.41	63	0.06302	0.0696
GO:0035257	nuclear hormone receptor binding	130	3	0.95	70	0.06965	0.0796
GO:0070513	death domain binding	10	1	0.07	65	0.07068	0.0747
GO:0001094	TFIID-class transcription factor complex...	10	1	0.07	66	0.07068	0.0747
GO:0051400	BH domain binding	10	1	0.07	67	0.07068	0.0747
GO:0004596	peptide alpha-N-acetyltransferase activi...	10	1	0.07	68	0.07068	0.0747
GO:0055102	lipase inhibitor activity	10	1	0.07	69	0.07068	0.0747
GO:0005488	binding	12487	100	91.17	158	0.07128	0.1768
GO:0016853	isomerase activity	133	3	0.97	73	0.07349	0.0839
GO:0140297	DNA-binding transcription factor binding	308	5	2.25	78	0.07494	0.0905
GO:0044877	protein-containing complex binding	1078	14	7.87	56	0.07689	0.0379
GO:0008097	5S rRNA binding	11	1	0.08	71	0.07747	0.0818
GO:0031996	thioesterase binding	11	1	0.08	72	0.07747	0.0818
GO:0003682	chromatin binding	512	7	3.74	82	0.08064	0.1016
GO:0008353	RNA polymerase II CTD heptapeptide repea...	12	1	0.09	74	0.08421	0.089
GO:0005068	transmembrane receptor protein tyrosine ...	12	1	0.09	75	0.08421	0.089
GO:1901611	phosphatidylglycerol binding	12	1	0.09	76	0.08421	0.089
GO:0016846	carbon-sulfur lyase activity	12	1	0.09	77	0.08421	0.089
GO:0042277	peptide binding	228	4	1.66	81	0.08564	0.1004
GO:0070491	repressing transcription factor binding	67	2	0.49	79	0.08599	0.0947
GO:0016462	pyrophosphatase activity	735	9	5.37	98	0.08817	0.1151
GO:0005525	GTP binding	324	5	2.37	88	0.08849	0.1063
GO:0016817	hydrolase activity acting on acid anhyd…	738	9	5.39	102	0.08989	0.1172
GO:0016818	hydrolase activity acting on acid anhyd…	738	9	5.39	103	0.08989	0.1172
GO:0043274	phospholipase binding	13	1	0.09	80	0.0909	0.096
GO:0046983	protein dimerization activity	827	15	6.04	14	0.09161	0.0017
GO:0032550	purine ribonucleoside binding	328	5	2.39	94	0.09207	0.1104
GO:0003725	double-stranded RNA binding	70	2	0.51	83	0.09264	0.102
GO:0032549	ribonucleoside binding	331	5	2.42	96	0.0948	0.1136
GO:0001883	purine nucleoside binding	331	5	2.42	97	0.0948	0.1136
GO:0051427	hormone receptor binding	149	3	1.09	89	0.09549	0.1086
GO:0016018	cyclosporin A binding	14	1	0.1	84	0.09754	0.103
GO:0044548	S100 protein binding	14	1	0.1	85	0.09754	0.103
GO:0017070	U6 snRNA binding	14	1	0.1	86	0.09754	0.103
GO:0030296	protein tyrosine kinase activator activi...	14	1	0.1	87	0.09754	0.103
GO:0072341	modified amino acid binding	73	2	0.53	90	0.09943	0.1094
GO:0035258	steroid hormone receptor binding	74	2	0.54	95	0.10172	0.1119
GO:0032561	guanyl ribonucleotide binding	339	5	2.47	104	0.10228	0.1223
GO:0019001	guanyl nucleotide binding	339	5	2.47	105	0.10228	0.1223
GO:0000900	translation repressor activity mRNA reg…	15	1	0.11	91	0.10414	0.1099
GO:0017160	Ral GTPase binding	15	1	0.11	92	0.10414	0.1099
GO:0022829	wide pore channel activity	15	1	0.11	93	0.10414	0.1099
GO:0043130	ubiquitin binding	76	2	0.55	101	0.10636	0.1169
GO:0004602	glutathione peroxidase activity	16	1	0.12	99	0.11069	0.1168
GO:0004659	prenyltransferase activity	16	1	0.12	100	0.11069	0.1168
GO:0016864	intramolecular oxidoreductase activity …	17	1	0.12	106	0.11719	0.1237
GO:0070628	proteasome binding	17	1	0.12	107	0.11719	0.1237
GO:0008656	cysteine-type endopeptidase activator ac...	17	1	0.12	108	0.11719	0.1237
GO:0001091	RNA polymerase II general transcription ...	17	1	0.12	109	0.11719	0.1237
GO:0003756	protein disulfide isomerase activity	17	1	0.12	110	0.11719	0.1237
GO:0044389	ubiquitin-like protein ligase binding	301	8	2.2	16	0.11789	0.0023
GO:0004857	enzyme inhibitor activity	258	4	1.88	118	0.12003	0.1395
GO:0003730	mRNA 3'-UTR binding	82	2	0.6	113	0.12058	0.1323
GO:0017116	single-stranded DNA helicase activity	18	1	0.13	111	0.12364	0.1304
GO:0042605	peptide antigen binding	18	1	0.13	112	0.12364	0.1304
GO:1990782	protein tyrosine kinase binding	84	2	0.61	117	0.12542	0.1376
GO:0017111	nucleoside-triphosphatase activity	688	8	5.02	138	0.12969	0.1628
GO:0001530	lipopolysaccharide binding	19	1	0.14	114	0.13005	0.1372
GO:0043138	3'-5' DNA helicase activity	19	1	0.14	115	0.13005	0.1372
GO:0042288	MHC class I protein binding	19	1	0.14	116	0.13005	0.1372
GO:0004298	threonine-type endopeptidase activity	20	1	0.15	119	0.13641	0.1439
GO:0016505	peptidase activator activity involved in...	20	1	0.15	120	0.13641	0.1439
GO:0046625	sphingolipid binding	20	1	0.15	121	0.13641	0.1439
GO:0016922	nuclear receptor binding	90	2	0.66	129	0.14021	0.1536
GO:0016616	oxidoreductase activity acting on the C…	91	2	0.66	130	0.14271	0.1563
GO:0016676	oxidoreductase activity acting on a hem…	21	1	0.15	123	0.14272	0.1505
GO:0015002	heme-copper terminal oxidase activity	21	1	0.15	124	0.14272	0.1505
GO:0000979	RNA polymerase II core promoter sequence...	21	1	0.15	125	0.14272	0.1505
GO:0004129	cytochrome-c oxidase activity	21	1	0.15	126	0.14272	0.1505
GO:0008198	ferrous iron binding	21	1	0.15	127	0.14272	0.1505
GO:0043027	cysteine-type endopeptidase inhibitor ac...	21	1	0.15	128	0.14272	0.1505
GO:0009055	electron transfer activity	92	2	0.67	135	0.14522	0.159
GO:0004866	endopeptidase inhibitor activity	92	2	0.67	136	0.14522	0.159
GO:0030414	peptidase inhibitor activity	93	2	0.68	137	0.14774	0.1617
GO:0016675	oxidoreductase activity acting on a hem…	22	1	0.16	131	0.14899	0.1571
GO:0042974	retinoic acid receptor binding	22	1	0.16	132	0.14899	0.1571
GO:0070840	dynein complex binding	22	1	0.16	133	0.14899	0.1571
GO:0003688	DNA replication origin binding	22	1	0.16	134	0.14899	0.1571
GO:0031490	chromatin DNA binding	94	2	0.69	144	0.15027	0.1644
GO:0051087	chaperone binding	94	2	0.69	145	0.15027	0.1644
GO:0140375	immune receptor activity	94	2	0.69	146	0.15027	0.1644
GO:0032182	ubiquitin-like protein binding	94	2	0.69	147	0.15027	0.1644
GO:0050997	quaternary ammonium group binding	23	1	0.17	139	0.15521	0.1636
GO:0031210	phosphatidylcholine binding	23	1	0.17	140	0.15521	0.1636
GO:0008649	rRNA methyltransferase activity	23	1	0.17	141	0.15521	0.1636
GO:0140102	catalytic activity acting on a rRNA	23	1	0.17	142	0.15521	0.1636
GO:0005504	fatty acid binding	23	1	0.17	143	0.15521	0.1636
GO:0030234	enzyme regulator activity	837	9	6.11	166	0.15731	0.1985
GO:0016614	oxidoreductase activity acting on CH-OH…	98	2	0.72	153	0.16047	0.1754
GO:0051959	dynein light intermediate chain binding	24	1	0.18	148	0.16139	0.1701
GO:0070003	threonine-type peptidase activity	24	1	0.18	149	0.16139	0.1701
GO:0044183	protein folding chaperone	24	1	0.18	150	0.16139	0.1701
GO:0035035	histone acetyltransferase binding	24	1	0.18	151	0.16139	0.1701
GO:0019239	deaminase activity	24	1	0.18	152	0.16139	0.1701
GO:0045505	dynein intermediate chain binding	25	1	0.18	154	0.16752	0.1765
GO:0035925	mRNA 3'-UTR AU-rich region binding	25	1	0.18	155	0.16752	0.1765
GO:0030371	translation repressor activity	25	1	0.18	156	0.16752	0.1765
GO:0019956	chemokine binding	25	1	0.18	157	0.16752	0.1765
GO:0017091	AU-rich element binding	26	1	0.19	159	0.17361	0.1829
GO:0050681	androgen receptor binding	26	1	0.19	160	0.17361	0.1829
GO:0016814	hydrolase activity acting on carbon-nit…	26	1	0.19	161	0.17361	0.1829
GO:0048027	mRNA 5'-UTR binding	26	1	0.19	162	0.17361	0.1829
GO:0003674	molecular_function	13438	102	98.11	324	0.17519	0.8813
GO:0004693	cyclin-dependent protein serine/threonin...	27	1	0.2	163	0.17966	0.1892
GO:0097472	cyclin-dependent protein kinase activity	27	1	0.2	164	0.17966	0.1892
GO:0045296	cadherin binding	304	4	2.22	169	0.18218	0.2089
GO:0071889	14-3-3 protein binding	28	1	0.2	165	0.18566	0.1955
GO:0097718	disordered domain specific binding	29	1	0.21	167	0.19161	0.2017
GO:0030332	cyclin binding	29	1	0.21	168	0.19161	0.2017
GO:0044325	ion channel binding	115	2	0.84	171	0.20504	0.2231
GO:0042287	MHC protein binding	32	1	0.23	170	0.20923	0.2201
GO:0042162	telomeric DNA binding	34	1	0.25	172	0.22076	0.2322
GO:0003712	transcription coregulator activity	450	5	3.29	184	0.23208	0.2685
GO:0030159	signaling receptor complex adaptor activ...	36	1	0.26	173	0.23212	0.244
GO:0031492	nucleosomal DNA binding	36	1	0.26	174	0.23212	0.244
GO:0005246	calcium channel regulator activity	36	1	0.26	175	0.23212	0.244
GO:0043021	ribonucleoprotein complex binding	127	2	0.93	180	0.23725	0.2575
GO:0004177	aminopeptidase activity	37	1	0.27	176	0.23774	0.2499
GO:0036002	pre-mRNA binding	38	1	0.28	177	0.24332	0.2557
GO:0140296	general transcription initiation factor ...	38	1	0.28	178	0.24332	0.2557
GO:0015036	disulfide oxidoreductase activity	38	1	0.28	179	0.24332	0.2557
GO:0030331	estrogen receptor binding	39	1	0.28	181	0.24886	0.2615
GO:0030544	Hsp70 protein binding	39	1	0.28	182	0.24886	0.2615
GO:0061629	RNA polymerase II-specific DNA-binding t...	239	3	1.74	187	0.25381	0.2816
GO:0019894	kinesin binding	40	1	0.29	183	0.25436	0.2672
GO:0016860	intramolecular oxidoreductase activity	41	1	0.3	185	0.25982	0.2729
GO:0003713	transcription coactivator activity	244	3	1.78	194	0.26365	0.2921
GO:0001046	core promoter sequence-specific DNA bind...	42	1	0.31	186	0.26524	0.2785
GO:0043565	sequence-specific DNA binding	1337	12	9.76	205	0.2687	0.3375
GO:0017069	snRNA binding	43	1	0.31	188	0.27062	0.2841
GO:0005507	copper ion binding	43	1	0.31	189	0.27062	0.2841
GO:0033293	monocarboxylic acid binding	43	1	0.31	190	0.27062	0.2841
GO:0001786	phosphatidylserine binding	44	1	0.32	191	0.27596	0.2896
GO:0015459	potassium channel regulator activity	44	1	0.32	192	0.27596	0.2896
GO:0070888	E-box binding	44	1	0.32	193	0.27596	0.2896
GO:0048156	tau protein binding	45	1	0.33	195	0.28127	0.2951
GO:0016538	cyclin-dependent protein serine/threonin...	45	1	0.33	196	0.28127	0.2951
GO:0031406	carboxylic acid binding	147	2	1.07	198	0.29138	0.3147
GO:0016765	transferase activity transferring alkyl…	47	1	0.34	197	0.29176	0.306
GO:0016829	lyase activity	151	2	1.1	201	0.30218	0.3261
GO:0045309	protein phosphorylated amino acid bindin...	50	1	0.37	199	0.30721	0.3221
GO:0051287	NAD binding	50	1	0.37	200	0.30721	0.3221
GO:0030374	nuclear receptor transcription coactivat...	52	1	0.38	202	0.31732	0.3325
GO:0001098	basal transcription machinery binding	52	1	0.38	203	0.31732	0.3325
GO:0001099	basal RNA polymerase II transcription ma...	52	1	0.38	204	0.31732	0.3325
GO:0043177	organic acid binding	158	2	1.15	207	0.32102	0.3458
GO:0043022	ribosome binding	54	1	0.39	206	0.32729	0.3429
GO:0019887	protein kinase regulator activity	161	2	1.18	209	0.32906	0.3543
GO:0042054	histone methyltransferase activity	55	1	0.4	208	0.33222	0.348
GO:0019843	rRNA binding	59	1	0.43	210	0.35159	0.368
GO:0034212	peptide N-acetyltransferase activity	59	1	0.43	211	0.35159	0.368

## Sheet: pDC
Supplementary Table 6. Dendritic cell recluster GO results -- pDC
GO.ID	Term	Annotated	Significant	Expected	Rank in Fisher.classic	Fisher.elim	Fisher.classic
GO:0019886	antigen processing and presentation of e...	88	8	0.48	9	2.1e-08	3.5e-08
GO:0060333	interferon-gamma-mediated signaling path...	77	6	0.42	24	3.3e-06	4.9e-06
GO:0006614	SRP-dependent cotranslational protein ta...	94	6	0.51	39	1.1e-05	1.6e-05
GO:0050852	T cell receptor signaling pathway	182	7	0.99	54	5.2e-05	7.9e-05
GO:0002250	adaptive immune response	355	11	1.92	25	0.00017	5.1e-06
GO:0043488	regulation of mRNA stability	172	6	0.93	75	0.00031	0.00044
GO:0046596	regulation of viral entry into host cell	26	3	0.14	74	0.00035	0.00042
GO:0006413	translational initiation	177	6	0.96	81	0.00036	0.00052
GO:0000184	nuclear-transcribed mRNA catabolic proce...	116	5	0.63	82	0.00038	0.00052
GO:0006952	defense response	1191	23	6.45	12	0.00052	1.1e-07
GO:0042742	defense response to bacterium	137	5	0.74	101	0.00082	0.00111
GO:0006979	response to oxidative stress	376	8	2.04	105	0.00086	0.00134
GO:0045859	regulation of protein kinase activity	688	11	3.73	121	0.001	0.00175
GO:0048013	ephrin receptor signaling pathway	85	4	0.46	107	0.0011	0.0014
GO:0038096	Fc-gamma receptor signaling pathway invo...	87	4	0.47	113	0.0012	0.00153
GO:0045657	positive regulation of monocyte differen...	10	2	0.05	108	0.00123	0.00141
GO:0002604	regulation of dendritic cell antigen pro...	10	2	0.05	109	0.00123	0.00141
GO:0043312	neutrophil degranulation	406	8	2.2	137	0.00141	0.00217
GO:0050868	negative regulation of T cell activation	95	4	0.51	135	0.00166	0.00211
GO:2001171	positive regulation of ATP biosynthetic ...	13	2	0.07	144	0.00212	0.00241
GO:0019083	viral transcription	170	5	0.92	156	0.00214	0.00286
GO:0002455	humoral immune response mediated by circ...	49	3	0.27	148	0.00226	0.00273
GO:0001895	retina homeostasis	50	3	0.27	157	0.0024	0.00289
GO:1904814	regulation of protein localization to ch...	14	2	0.08	151	0.00246	0.0028
GO:0035751	regulation of lysosomal lumen pH	14	2	0.08	152	0.00246	0.0028
GO:0008285	negative regulation of cell population p...	556	9	3.01	186	0.00274	0.0043
GO:0042402	cellular biogenic amine catabolic proces...	15	2	0.08	165	0.00283	0.00322
GO:0060263	regulation of respiratory burst	15	2	0.08	166	0.00283	0.00322
GO:0002830	positive regulation of type 2 immune res...	15	2	0.08	167	0.00283	0.00322
GO:0045454	cell redox homeostasis	53	3	0.29	168	0.00283	0.00342
GO:0006956	complement activation	54	3	0.29	171	0.00299	0.0036
GO:0010310	regulation of hydrogen peroxide metaboli...	16	2	0.09	174	0.00322	0.00367
GO:1901700	response to oxygen-containing compound	1311	15	7.1	212	0.00349	0.00666
GO:0050765	negative regulation of phagocytosis	17	2	0.09	181	0.00364	0.00414
GO:0032677	regulation of interleukin-8 production	58	3	0.31	188	0.00366	0.00441
GO:0006662	glycerol ether metabolic process	18	2	0.1	192	0.00408	0.00464
GO:0006911	phagocytosis engulfment	61	3	0.33	197	0.00422	0.00508
GO:0019883	antigen processing and presentation of e...	19	2	0.1	198	0.00454	0.00517
GO:0032507	maintenance of protein location in cell	63	3	0.34	203	0.00462	0.00556
GO:0032967	positive regulation of collagen biosynth...	20	2	0.11	204	0.00503	0.00572
GO:0043085	positive regulation of catalytic activit...	1230	14	6.66	245	0.00507	0.00922
GO:0042129	regulation of T cell proliferation	135	4	0.73	225	0.00587	0.0074
GO:0048678	response to axon injury	69	3	0.37	220	0.00596	0.00716
GO:0001738	morphogenesis of a polarized epithelium	136	4	0.74	229	0.00602	0.0076
GO:0007035	vacuolar acidification	22	2	0.12	214	0.00607	0.00691
GO:0032069	regulation of nuclease activity	22	2	0.12	215	0.00607	0.00691
GO:0090023	positive regulation of neutrophil chemot...	22	2	0.12	216	0.00607	0.00691
GO:0044419	interspecies interaction between organis...	1665	29	9.02	7	0.00636	1.3e-08
GO:0002479	antigen processing and presentation of e...	71	3	0.38	231	0.00645	0.00775
GO:1901570	fatty acid derivative biosynthetic proce...	71	3	0.38	232	0.00645	0.00775
GO:0050853	B cell receptor signaling pathway	71	3	0.38	233	0.00645	0.00775
GO:0031579	membrane raft organization	23	2	0.12	228	0.00663	0.00753
GO:0035567	non-canonical Wnt signaling pathway	141	4	0.76	241	0.00683	0.0086
GO:0050715	positive regulation of cytokine secretio...	24	2	0.13	237	0.00721	0.00819
GO:0070229	negative regulation of lymphocyte apopto...	24	2	0.13	238	0.00721	0.00819
GO:1901564	organonitrogen compound metabolic proces...	5449	48	29.52	57	0.00803	8.8e-05
GO:0065003	protein-containing complex assembly	1439	15	7.8	287	0.00825	0.01508
GO:0070199	establishment of protein localization to...	26	2	0.14	248	0.00843	0.00957
GO:0006910	phagocytosis recognition	26	2	0.14	249	0.00843	0.00957
GO:0110053	regulation of actin filament organizatio...	236	5	1.28	259	0.00855	0.01121
GO:0002697	regulation of immune effector process	332	6	1.8	264	0.00856	0.01169
GO:0032649	regulation of interferon-gamma productio...	79	3	0.43	254	0.00866	0.01038
GO:0033209	tumor necrosis factor-mediated signaling...	155	4	0.84	270	0.00947	0.01188
GO:0043044	ATP-dependent chromatin remodeling	82	3	0.44	262	0.00959	0.01148
GO:0030574	collagen catabolic process	28	2	0.15	255	0.00973	0.01105
GO:0051085	chaperone cofactor-dependent protein ref...	28	2	0.15	256	0.00973	0.01105
GO:0050871	positive regulation of B cell activation	84	3	0.46	272	0.01024	0.01225
GO:0045737	positive regulation of cyclin-dependent ...	29	2	0.16	265	0.01042	0.01183
GO:0046651	lymphocyte proliferation	224	7	1.21	67	0.01056	0.00029
GO:0080134	regulation of response to stress	1205	13	6.53	308	0.01076	0.0183
GO:0032735	positive regulation of interleukin-12 pr...	30	2	0.16	274	0.01112	0.01263
GO:0010638	positive regulation of organelle organiz...	573	8	3.1	296	0.01118	0.01627
GO:0032943	mononuclear cell proliferation	226	7	1.22	68	0.01121	0.0003
GO:0050821	protein stabilization	164	4	0.89	285	0.01148	0.01436
GO:1901989	positive regulation of cell cycle phase ...	88	3	0.48	280	0.01162	0.01389
GO:0034622	cellular protein-containing complex asse...	952	11	5.16	315	0.01183	0.01889
GO:0010033	response to organic substance	2632	29	14.26	64	0.01201	0.00016
GO:0000079	regulation of cyclin-dependent protein s...	90	3	0.49	286	0.01234	0.01475
GO:0001937	negative regulation of endothelial cell ...	32	2	0.17	283	0.0126	0.01429
GO:0034599	cellular response to oxidative stress	261	5	1.41	300	0.01282	0.0167
GO:1900087	positive regulation of G1/S transition o...	33	2	0.18	289	0.01336	0.01516
GO:1904031	positive regulation of cyclin-dependent ...	33	2	0.18	290	0.01336	0.01516
GO:1904029	regulation of cyclin-dependent protein k...	94	3	0.51	297	0.01387	0.01656
GO:0010639	negative regulation of organelle organiz...	369	6	2	311	0.0139	0.01877
GO:0046456	icosanoid biosynthetic process	34	2	0.18	294	0.01415	0.01605
GO:0033574	response to testosterone	34	2	0.18	295	0.01415	0.01605
GO:1902905	positive regulation of supramolecular fi...	179	4	0.97	317	0.01539	0.01919
GO:0009617	response to bacterium	428	10	2.32	63	0.01543	0.00015
GO:0006958	complement activation classical pathway	36	2	0.2	304	0.01578	0.01789
GO:1902750	negative regulation of cell cycle G2/M p...	99	3	0.54	316	0.01593	0.01899
GO:0051707	response to other organism	1056	19	5.72	26	0.01654	5.3e-06
GO:0043207	response to external biotic stimulus	1056	19	5.72	27	0.01654	5.3e-06
GO:0014002	astrocyte development	37	2	0.2	312	0.01663	0.01884
GO:1903053	regulation of extracellular matrix organ...	37	2	0.2	313	0.01663	0.01884
GO:0006900	vesicle budding from membrane	101	3	0.55	324	0.0168	0.02001
GO:0006520	cellular amino acid metabolic process	280	5	1.52	338	0.0169	0.0219
GO:0060071	Wnt signaling pathway planar cell polar…	102	3	0.55	326	0.01724	0.02053
GO:0051259	protein complex oligomerization	186	4	1.01	334	0.01748	0.02175
GO:0045581	negative regulation of T cell differenti...	38	2	0.21	321	0.01749	0.01981
GO:0043618	regulation of transcription from RNA pol...	103	3	0.56	330	0.01769	0.02106
GO:0090175	regulation of establishment of planar po...	104	3	0.56	332	0.01815	0.0216
GO:0070661	leukocyte proliferation	244	7	1.32	76	0.01816	0.00048
GO:0009628	response to abiotic stimulus	1015	11	5.5	368	0.01836	0.02872
GO:0034080	CENP-A containing nucleosome assembly	39	2	0.21	327	0.01837	0.02081
GO:0061641	CENP-A containing chromatin organization	39	2	0.21	328	0.01837	0.02081
GO:0043030	regulation of macrophage activation	40	2	0.22	335	0.01928	0.02182
GO:0030449	regulation of complement activation	40	2	0.22	336	0.01928	0.02182
GO:0001775	cell activation	1167	20	6.32	28	0.0196	5.9e-06
GO:0019538	protein metabolic process	4716	41	25.55	89	0.01969	0.00078
GO:0009607	response to biotic stimulus	1085	19	5.88	30	0.02016	7.9e-06
GO:0043620	regulation of DNA-templated transcriptio...	109	3	0.59	344	0.02053	0.02441
GO:0032757	positive regulation of interleukin-8 pro...	42	2	0.23	341	0.02113	0.02392
GO:1902808	positive regulation of cell cycle G1/S p...	42	2	0.23	342	0.02113	0.02392
GO:0051129	negative regulation of cellular componen...	644	8	3.49	379	0.02119	0.03019
GO:0001666	response to hypoxia	298	5	1.61	362	0.0215	0.02771
GO:1901698	response to nitrogen compound	906	10	4.91	392	0.02175	0.03283
GO:0010948	negative regulation of cell cycle proces...	299	5	1.62	365	0.02178	0.02805
GO:0051495	positive regulation of cytoskeleton orga...	199	4	1.08	357	0.0218	0.02703
GO:0006334	nucleosome assembly	112	3	0.61	354	0.02204	0.02618
GO:0038095	Fc-epsilon receptor signaling pathway	112	3	0.61	355	0.02204	0.02618
GO:0045620	negative regulation of lymphocyte differ...	43	2	0.23	347	0.02209	0.02499
GO:0031055	chromatin remodeling at centromere	43	2	0.23	348	0.02209	0.02499
GO:0032271	regulation of protein polymerization	201	4	1.09	363	0.02252	0.0279
GO:1902749	regulation of cell cycle G2/M phase tran...	201	4	1.09	364	0.02252	0.0279
GO:1901987	regulation of cell cycle phase transitio...	413	6	2.24	380	0.02288	0.03049
GO:0001961	positive regulation of cytokine-mediated...	44	2	0.24	352	0.02306	0.02609
GO:0032653	regulation of interleukin-10 production	44	2	0.24	353	0.02306	0.02609
GO:0032270	positive regulation of cellular protein ...	1332	13	7.22	422	0.02313	0.03771
GO:0062197	cellular response to chemical stress	304	5	1.65	377	0.0232	0.02984
GO:0031347	regulation of defense response	532	7	2.88	389	0.02324	0.03198
GO:0044267	cellular protein metabolic process	4365	39	23.65	86	0.02352	0.00067
GO:0051234	establishment of localization	4234	45	22.94	19	0.02357	9.1e-07
GO:0042180	cellular ketone metabolic process	204	4	1.11	370	0.02362	0.02924
GO:0048522	positive regulation of cellular process	4560	37	24.7	213	0.02375	0.00682
GO:0051224	negative regulation of protein transport	116	3	0.63	367	0.02414	0.02865
GO:0007164	establishment of tissue polarity	117	3	0.63	371	0.02468	0.02929
GO:0001736	establishment of planar polarity	117	3	0.63	372	0.02468	0.02929
GO:0036293	response to decreased oxygen levels	310	5	1.68	391	0.02498	0.03208
GO:0032655	regulation of interleukin-12 production	46	2	0.25	366	0.02506	0.02833
GO:0042542	response to hydrogen peroxide	118	3	0.64	378	0.02523	0.02993
GO:0032613	interleukin-10 production	47	2	0.25	373	0.02608	0.02948
GO:0032615	interleukin-12 production	47	2	0.25	374	0.02608	0.02948
GO:0051496	positive regulation of stress fiber asse...	47	2	0.25	375	0.02608	0.02948
GO:1904950	negative regulation of establishment of ...	120	3	0.65	384	0.02635	0.03124
GO:0001818	negative regulation of cytokine producti...	212	4	1.15	393	0.02672	0.03301
GO:0050777	negative regulation of immune response	121	3	0.66	388	0.02692	0.0319
GO:0045840	positive regulation of mitotic nuclear d...	48	2	0.26	381	0.02712	0.03065
GO:0006469	negative regulation of protein kinase ac...	213	4	1.15	400	0.02713	0.03351
GO:0052547	regulation of peptidase activity	318	5	1.72	407	0.02749	0.03522
GO:0006336	DNA replication-independent nucleosome a...	49	2	0.27	386	0.02818	0.03184
GO:0006810	transport	4121	43	22.32	22	0.02827	3.7e-06
GO:1901701	cellular response to oxygen-containing c...	946	10	5.12	442	0.02831	0.04219
GO:1901565	organonitrogen compound catabolic proces...	1135	13	6.15	263	0.02922	0.01155
GO:0042130	negative regulation of T cell proliferat...	50	2	0.27	394	0.02926	0.03305
GO:0034724	DNA replication-independent nucleosome o...	50	2	0.27	395	0.02926	0.03305
GO:0060760	positive regulation of response to cytok...	50	2	0.27	396	0.02926	0.03305
GO:0050864	regulation of B cell activation	126	3	0.68	408	0.02986	0.03535
GO:0043486	histone exchange	51	2	0.28	402	0.03035	0.03427
GO:0034508	centromere complex assembly	51	2	0.28	403	0.03035	0.03427
GO:0032387	negative regulation of intracellular tra...	51	2	0.28	404	0.03035	0.03427
GO:0001819	positive regulation of cytokine producti...	360	7	1.95	189	0.03059	0.00443
GO:0044770	cell cycle phase transition	565	7	3.06	441	0.03091	0.04214
GO:0006508	proteolysis	1388	13	7.52	465	0.03115	0.04987
GO:0010517	regulation of phospholipase activity	52	2	0.28	409	0.03145	0.03551
GO:0051241	negative regulation of multicellular org...	963	10	5.22	458	0.03149	0.04669
GO:0010594	regulation of endothelial cell migration	129	3	0.7	421	0.03171	0.0375
GO:0070482	response to oxygen levels	332	5	1.8	437	0.03226	0.04117
GO:0051897	positive regulation of protein kinase B ...	130	3	0.7	428	0.03233	0.03823
GO:0002920	regulation of humoral immune response	53	2	0.29	414	0.03258	0.03677
GO:0051247	positive regulation of protein metabolic...	1399	13	7.58	478	0.03294	0.05255
GO:0008219	cell death	1769	17	9.58	325	0.03306	0.02028
GO:0051051	negative regulation of transport	361	7	1.96	191	0.0333	0.00449
GO:0006898	receptor-mediated endocytosis	228	4	1.24	438	0.03364	0.04137
GO:1901988	negative regulation of cell cycle phase ...	228	4	1.24	439	0.03364	0.04137
GO:0030837	negative regulation of actin filament po...	54	2	0.29	423	0.03371	0.03805
GO:0002381	immunoglobulin production involved in im...	54	2	0.29	424	0.03371	0.03805
GO:0032233	positive regulation of actin filament bu...	54	2	0.29	425	0.03371	0.03805
GO:0032729	positive regulation of interferon-gamma ...	54	2	0.29	426	0.03371	0.03805
GO:0022617	extracellular matrix disassembly	54	2	0.29	427	0.03371	0.03805
GO:0051091	positive regulation of DNA-binding trans...	229	4	1.24	440	0.0341	0.04193
GO:0042113	B cell activation	230	4	1.25	443	0.03457	0.0425
GO:0033673	negative regulation of kinase activity	231	4	1.25	446	0.03504	0.04306
GO:0014070	response to organic cyclic compound	710	8	3.85	464	0.03515	0.04909
GO:0002532	production of molecular mediator involve...	56	2	0.3	433	0.03604	0.04065
GO:0006521	regulation of cellular amino acid metabo...	56	2	0.3	434	0.03604	0.04065
GO:1903902	positive regulation of viral life cycle	56	2	0.3	435	0.03604	0.04065
GO:0045815	positive regulation of gene expression …	56	2	0.3	436	0.03604	0.04065
GO:0044087	regulation of cellular component biogene...	850	9	4.6	476	0.03662	0.05247
GO:0030163	protein catabolic process	850	9	4.6	477	0.03662	0.05247
GO:0051494	negative regulation of cytoskeleton orga...	137	3	0.74	451	0.03691	0.04356
GO:0000082	G1/S transition of mitotic cell cycle	235	4	1.27	456	0.03696	0.04538
GO:0045931	positive regulation of mitotic cell cycl...	138	3	0.75	453	0.03759	0.04435
GO:2000045	regulation of G1/S transition of mitotic...	139	3	0.75	455	0.03827	0.04515
GO:0051785	positive regulation of nuclear division	58	2	0.31	447	0.03842	0.04332
GO:0042255	ribosome assembly	58	2	0.31	448	0.03842	0.04332
GO:0016032	viral process	847	15	4.59	53	0.03856	7.5e-05
GO:0034728	nucleosome organization	143	3	0.77	463	0.04108	0.04841
GO:0016579	protein deubiquitination	245	4	1.33	470	0.04203	0.05146
GO:2001259	positive regulation of cation channel ac...	61	2	0.33	460	0.0421	0.04743
GO:0051649	establishment of localization in cell	2425	28	13.14	59	0.04246	9.9e-05
GO:0042605	peptide antigen binding	18	6	0.1	1	3.2e-10	4.7e-10
GO:0023026	MHC class II protein complex binding	16	4	0.09	3	1.3e-06	1.6e-06
GO:0140375	immune receptor activity	94	5	0.5	6	0.00014	0.00019
GO:0005200	structural constituent of cytoskeleton	73	4	0.39	9	0.0006	0.00077
GO:0003735	structural constituent of ribosome	149	5	0.8	12	0.00115	0.00154
GO:0030957	Tat protein binding	10	2	0.05	11	0.00121	0.00138
GO:0019887	protein kinase regulator activity	161	5	0.86	13	0.00162	0.00217
GO:0050998	nitric-oxide synthase binding	13	2	0.07	14	0.00208	0.00237
GO:0003723	RNA binding	1537	17	8.25	20	0.00236	0.00485
GO:0019865	immunoglobulin binding	15	2	0.08	16	0.00278	0.00316
GO:0031683	G-protein beta/gamma-subunit complex bin...	16	2	0.09	17	0.00317	0.0036
GO:0030247	polysaccharide binding	16	2	0.09	18	0.00317	0.0036
GO:0005125	cytokine activity	121	4	0.65	21	0.00386	0.00488
GO:0034987	immunoglobulin receptor binding	20	2	0.11	22	0.00494	0.00562
GO:0015035	protein disulfide oxidoreductase activit...	20	2	0.11	23	0.00494	0.00562
GO:0044183	protein folding chaperone	24	2	0.13	24	0.00708	0.00804
GO:0003785	actin monomer binding	25	2	0.13	25	0.00767	0.00871
GO:0005515	protein binding	10921	68	58.63	40	0.00874	0.05307
GO:0005154	epidermal growth factor receptor binding	28	2	0.15	26	0.00957	0.01085
GO:0042287	MHC protein binding	32	2	0.17	27	0.01239	0.01403
GO:0031492	nucleosomal DNA binding	36	2	0.19	28	0.01552	0.01756
GO:0051082	unfolded protein binding	99	3	0.53	29	0.01556	0.01851
GO:0003823	antigen binding	59	8	0.32	2	0.01698	1.3e-09
GO:0001046	core promoter sequence-specific DNA bind...	42	2	0.23	32	0.02079	0.02349
GO:0048306	calcium-dependent protein binding	55	2	0.3	33	0.03431	0.03865
GO:0019901	protein kinase binding	592	7	3.18	38	0.03688	0.04974
GO:0019843	rRNA binding	59	2	0.32	35	0.039	0.0439
GO:0004860	protein kinase inhibitor activity	63	2	0.34	37	0.04392	0.0494
GO:0016209	antioxidant activity	65	2	0.35	39	0.04647	0.05223
GO:0031491	nucleosome binding	66	2	0.35	42	0.04776	0.05367
GO:0019210	kinase inhibitor activity	67	2	0.36	43	0.04906	0.05512
GO:0099186	structural constituent of postsynapse	10	1	0.05	44	0.05174	0.05515
GO:0008253	5'-nucleotidase activity	10	1	0.05	45	0.05174	0.05515
GO:0005102	signaling receptor binding	1179	16	6.33	10	0.05458	0.00079
GO:0016668	oxidoreductase activity acting on a sul…	11	1	0.06	46	0.05676	0.06049
GO:0098599	palmitoyl hydrolase activity	11	1	0.06	47	0.05676	0.06049
GO:0005212	structural constituent of eye lens	11	1	0.06	48	0.05676	0.06049
GO:0016290	palmitoyl-CoA hydrolase activity	11	1	0.06	49	0.05676	0.06049
GO:0008474	palmitoyl-(protein) hydrolase activity	11	1	0.06	50	0.05676	0.06049
GO:0001540	amyloid-beta binding	73	2	0.39	52	0.05716	0.06413
GO:0016722	oxidoreductase activity oxidizing metal…	12	1	0.06	54	0.06176	0.06581
GO:0016846	carbon-sulfur lyase activity	12	1	0.06	55	0.06176	0.06581
GO:0043023	ribosomal large subunit binding	12	1	0.06	56	0.06176	0.06581
GO:0008252	nucleotidase activity	12	1	0.06	57	0.06176	0.06581
GO:0003924	GTPase activity	281	4	1.51	60	0.06178	0.07478
GO:0008233	peptidase activity	404	5	2.17	62	0.06284	0.07846
GO:0019900	kinase binding	671	7	3.6	67	0.06421	0.08469
GO:0015037	peptide disulfide oxidoreductase activit...	13	1	0.07	58	0.06674	0.0711
GO:0051428	peptide hormone receptor binding	13	1	0.07	59	0.06674	0.0711
GO:0047617	acyl-CoA hydrolase activity	14	1	0.08	61	0.07169	0.07635
GO:0042802	identical protein binding	1587	13	8.52	88	0.0723	0.10841
GO:0016702	oxidoreductase activity acting on singl…	15	1	0.08	63	0.07661	0.08158
GO:0031681	G-protein beta-subunit binding	15	1	0.08	64	0.07661	0.08158
GO:0035615	clathrin adaptor activity	15	1	0.08	65	0.07661	0.08158
GO:0010314	phosphatidylinositol-5-phosphate binding	15	1	0.08	66	0.07661	0.08158
GO:0019899	enzyme binding	2003	17	10.75	41	0.08096	0.05342
GO:0016701	oxidoreductase activity acting on singl…	16	1	0.09	69	0.0815	0.08678
GO:0004602	glutathione peroxidase activity	16	1	0.09	70	0.0815	0.08678
GO:0140312	cargo adaptor activity	16	1	0.09	71	0.0815	0.08678
GO:0016289	CoA hydrolase activity	16	1	0.09	72	0.0815	0.08678
GO:0098918	structural constituent of synapse	16	1	0.09	73	0.0815	0.08678
GO:0009055	electron transfer activity	92	2	0.49	75	0.08545	0.09548
GO:0043024	ribosomal small subunit binding	17	1	0.09	74	0.08637	0.09195
GO:0031490	chromatin DNA binding	94	2	0.5	76	0.08864	0.09899
GO:0001664	G protein-coupled receptor binding	199	3	1.07	80	0.08869	0.10291
GO:0008083	growth factor activity	97	2	0.52	81	0.09348	0.10433
GO:0005086	ARF guanyl-nucleotide exchange factor ac...	19	1	0.1	78	0.09604	0.1022
GO:0042288	MHC class I protein binding	19	1	0.1	79	0.09604	0.1022
GO:0061135	endopeptidase regulator activity	100	2	0.54	89	0.0984	0.10975
GO:0070412	R-SMAD binding	20	1	0.11	83	0.10083	0.10729
GO:0004298	threonine-type endopeptidase activity	20	1	0.11	84	0.10083	0.10729
GO:0001968	fibronectin binding	20	1	0.11	85	0.10083	0.10729
GO:0071855	neuropeptide receptor binding	20	1	0.11	86	0.10083	0.10729
GO:0051861	glycolipid binding	20	1	0.11	87	0.10083	0.10729
GO:0000979	RNA polymerase II core promoter sequence...	21	1	0.11	90	0.1056	0.11234
GO:0016676	oxidoreductase activity acting on a hem…	21	1	0.11	91	0.1056	0.11234
GO:0008198	ferrous iron binding	21	1	0.11	92	0.1056	0.11234
GO:0015002	heme-copper terminal oxidase activity	21	1	0.11	93	0.1056	0.11234
GO:0004129	cytochrome-c oxidase activity	21	1	0.11	94	0.1056	0.11234
GO:0016675	oxidoreductase activity acting on a hem…	22	1	0.12	95	0.11035	0.11737
GO:0043236	laminin binding	22	1	0.12	96	0.11035	0.11737
GO:0080025	phosphatidylinositol-35-bisphosphate bi…	24	1	0.13	97	0.11976	0.12734
GO:0070273	phosphatidylinositol-4-phosphate binding	24	1	0.13	98	0.11976	0.12734
GO:0070003	threonine-type peptidase activity	24	1	0.13	99	0.11976	0.12734
GO:0048027	mRNA 5'-UTR binding	26	1	0.14	100	0.12908	0.1372
GO:0043548	phosphatidylinositol 3-kinase binding	26	1	0.14	101	0.12908	0.1372
GO:0051787	misfolded protein binding	26	1	0.14	102	0.12908	0.1372
GO:1904680	peptide transmembrane transporter activi...	27	1	0.14	103	0.1337	0.14208
GO:0004693	cyclin-dependent protein serine/threonin...	27	1	0.14	104	0.1337	0.14208
GO:0097472	cyclin-dependent protein kinase activity	27	1	0.14	105	0.1337	0.14208
GO:0004180	carboxypeptidase activity	28	1	0.15	106	0.1383	0.14695
GO:0097718	disordered domain specific binding	29	1	0.16	107	0.14287	0.15178
GO:0016787	hydrolase activity	1956	14	10.5	127	0.14615	0.20949
GO:0030291	protein serine/threonine kinase inhibito...	30	1	0.16	109	0.14742	0.15658
GO:0004888	transmembrane signaling receptor activit...	530	5	2.85	116	0.14929	0.18041
GO:0051059	NF-kappaB binding	31	1	0.17	110	0.15195	0.16136
GO:0043394	proteoglycan binding	31	1	0.17	111	0.15195	0.16136
GO:0061134	peptidase regulator activity	132	2	0.71	113	0.15472	0.17139
GO:0016790	thiolester hydrolase activity	32	1	0.17	112	0.15645	0.16612
GO:0017111	nucleoside-triphosphatase activity	688	6	3.69	121	0.15661	0.19313
GO:0004857	enzyme inhibitor activity	258	3	1.39	115	0.15664	0.17925
GO:0042803	protein homodimerization activity	541	5	2.9	120	0.15853	0.19105
GO:0016491	oxidoreductase activity	579	7	3.11	36	0.16157	0.04507
GO:0004869	cysteine-type endopeptidase inhibitor ac...	34	1	0.18	114	0.16538	0.17554
GO:0004175	endopeptidase activity	265	3	1.42	117	0.16558	0.18917
GO:0004601	peroxidase activity	37	1	0.2	118	0.17861	0.18948
GO:0043531	ADP binding	37	1	0.2	119	0.17861	0.18948
GO:0016504	peptidase activator activity	39	1	0.21	122	0.18731	0.19865
GO:0005544	calcium-dependent phospholipid binding	39	1	0.21	123	0.18731	0.19865
GO:0032266	phosphatidylinositol-3-phosphate binding	40	1	0.21	124	0.19162	0.20319
GO:0019894	kinesin binding	40	1	0.21	125	0.19162	0.20319
GO:0016462	pyrophosphatase activity	735	6	3.95	133	0.19328	0.23552
GO:0016817	hydrolase activity acting on acid anhyd…	738	6	3.96	134	0.19572	0.23832
GO:0016818	hydrolase activity acting on acid anhyd…	738	6	3.96	135	0.19572	0.23832
GO:0016684	oxidoreductase activity acting on perox…	41	1	0.22	126	0.19592	0.20771
GO:0050840	extracellular matrix binding	42	1	0.23	128	0.20019	0.2122
GO:0042887	amide transmembrane transporter activity	42	1	0.23	129	0.20019	0.2122
GO:0005507	copper ion binding	43	1	0.23	130	0.20444	0.21667
GO:0048156	tau protein binding	45	1	0.24	131	0.21287	0.22553
GO:0016538	cyclin-dependent protein serine/threonin...	45	1	0.24	132	0.21287	0.22553
GO:0030246	carbohydrate binding	184	4	0.99	31	0.21495	0.02035
GO:0044877	protein-containing complex binding	1078	14	5.79	15	0.22642	0.00266
GO:0051287	NAD binding	50	1	0.27	136	0.23357	0.24726
GO:0042562	hormone binding	52	1	0.28	138	0.24169	0.25578
GO:1990841	promoter-specific chromatin binding	53	1	0.28	139	0.24572	0.26
GO:0005525	GTP binding	324	3	1.74	142	0.24592	0.27729
GO:0032550	purine ribonucleoside binding	328	3	1.76	144	0.2516	0.28345
GO:0000287	magnesium ion binding	183	2	0.98	141	0.25282	0.27714
GO:0001883	purine nucleoside binding	331	3	1.78	148	0.25588	0.28809
GO:0032549	ribonucleoside binding	331	3	1.78	149	0.25588	0.28809
GO:0097110	scaffold protein binding	56	1	0.3	140	0.25769	0.27253
GO:0005488	binding	12487	73	67.03	137	0.26128	0.25243
GO:0001882	nucleoside binding	336	3	1.8	151	0.26303	0.29582
GO:0005518	collagen binding	58	1	0.31	143	0.26557	0.28077
GO:0032561	guanyl ribonucleotide binding	339	3	1.82	152	0.26734	0.30047
GO:0019001	guanyl nucleotide binding	339	3	1.82	153	0.26734	0.30047
GO:0001618	virus receptor activity	59	1	0.32	145	0.26947	0.28485
GO:0030276	clathrin binding	59	1	0.32	146	0.26947	0.28485
GO:0140272	exogenous protein binding	59	1	0.32	147	0.26947	0.28485
GO:0042277	peptide binding	228	8	1.22	5	0.27293	4.3e-05
GO:0046983	protein dimerization activity	827	6	4.44	160	0.27318	0.32546
GO:0030971	receptor tyrosine kinase binding	60	1	0.32	150	0.27336	0.28891
GO:0000049	tRNA binding	63	1	0.34	154	0.28489	0.30096
GO:0033613	activating transcription factor binding	66	1	0.35	155	0.29625	0.3128
GO:0030295	protein kinase activator activity	66	1	0.35	156	0.29625	0.3128
GO:0004553	hydrolase activity hydrolyzing O-glycos…	67	1	0.36	157	0.29999	0.31671
GO:0042393	histone binding	210	2	1.13	163	0.30587	0.33352
GO:0008238	exopeptidase activity	69	1	0.37	158	0.30743	0.32445
GO:0004896	cytokine receptor activity	69	1	0.37	159	0.30743	0.32445
GO:0003725	double-stranded RNA binding	70	1	0.38	161	0.31111	0.32829
GO:0046332	SMAD binding	71	1	0.38	162	0.31478	0.33211
GO:0008080	N-acetyltransferase activity	72	1	0.39	166	0.31843	0.3359
GO:0019209	kinase activator activity	72	1	0.39	167	0.31843	0.3359
GO:0030674	protein-macromolecule adaptor activity	217	2	1.16	169	0.31956	0.34798
GO:0005543	phospholipid binding	380	3	2.04	173	0.32679	0.36414
GO:0020037	heme binding	75	1	0.4	168	0.32926	0.34716
GO:0004197	cysteine-type endopeptidase activity	77	1	0.41	170	0.33638	0.35457
GO:0042626	ATPase-coupled transmembrane transporter...	78	1	0.42	171	0.33992	0.35824
GO:0051213	dioxygenase activity	79	1	0.42	172	0.34343	0.36189
GO:0003730	mRNA 3'-UTR binding	82	1	0.44	174	0.35387	0.37271
GO:0046906	tetrapyrrole binding	83	1	0.45	175	0.35731	0.37628
GO:0015399	primary active transmembrane transporter...	84	1	0.45	176	0.36074	0.37983
GO:1990782	protein tyrosine kinase binding	84	1	0.45	177	0.36074	0.37983
GO:0016410	N-acyltransferase activity	87	1	0.47	178	0.3709	0.39035
GO:0016407	acetyltransferase activity	89	1	0.48	180	0.37759	0.39727
GO:0016651	oxidoreductase activity acting on NAD(P…	90	1	0.48	181	0.38091	0.4007
GO:0033218	amide binding	289	8	1.55	7	0.38187	0.00022
GO:0016616	oxidoreductase activity acting on the C…	91	1	0.49	182	0.38421	0.40411
GO:0008236	serine-type peptidase activity	92	1	0.49	183	0.38749	0.4075
GO:0004866	endopeptidase inhibitor activity	92	1	0.49	184	0.38749	0.4075
GO:0030414	peptidase inhibitor activity	93	1	0.5	185	0.39076	0.41087
GO:0097367	carbohydrate derivative binding	1855	11	9.96	205	0.39319	0.48233
GO:0051087	chaperone binding	94	1	0.5	186	0.39401	0.41423
GO:0017171	serine hydrolase activity	95	1	0.51	187	0.39724	0.41756
GO:0005506	iron ion binding	95	1	0.51	188	0.39724	0.41756
GO:0019955	cytokine binding	97	1	0.52	189	0.40365	0.42418
GO:0015078	proton transmembrane transporter activit...	98	1	0.53	190	0.40683	0.42746
GO:0016614	oxidoreductase activity acting on CH-OH…	98	1	0.53	191	0.40683	0.42746
GO:0016798	hydrolase activity acting on glycosyl b…	99	1	0.53	192	0.40999	0.43072
GO:1902936	phosphatidylinositol bisphosphate bindin...	99	1	0.53	193	0.40999	0.43072
GO:0047485	protein N-terminus binding	100	1	0.54	194	0.41314	0.43396
GO:0008234	cysteine-type peptidase activity	100	1	0.54	195	0.41314	0.43396
GO:0003729	mRNA binding	269	2	1.44	200	0.41849	0.45137
GO:0003674	molecular_function	13438	74	72.14	273	0.41981	0.9192
GO:0008047	enzyme activator activity	446	3	2.39	202	0.42219	0.46432
GO:0042826	histone deacetylase binding	104	1	0.56	197	0.42557	0.44674
GO:0005201	extracellular matrix structural constitu...	104	1	0.56	198	0.42557	0.44674
GO:0002020	protease binding	104	1	0.56	199	0.42557	0.44674
GO:0019838	growth factor binding	106	1	0.57	201	0.43168	0.45303
GO:0060090	molecular adaptor activity	279	2	1.5	203	0.43675	0.47023
GO:0044325	ion channel binding	115	1	0.62	204	0.45841	0.48046
GO:0031072	heat shock protein binding	116	1	0.62	206	0.4613	0.48342
GO:0140101	catalytic activity acting on a tRNA	119	1	0.64	207	0.46989	0.49221
GO:0043021	ribonucleoprotein complex binding	127	1	0.68	208	0.49213	0.51492
GO:0051020	GTPase binding	504	3	2.71	212	0.50234	0.54658
GO:0003682	chromatin binding	512	3	2.75	213	0.51298	0.55736
GO:0019903	protein phosphatase binding	135	1	0.72	211	0.51345	0.53663
GO:0003779	actin binding	368	4	1.98	108	0.53191	0.15493
GO:0051427	hormone receptor binding	149	1	0.8	214	0.54866	0.57235
GO:0016829	lyase activity	151	1	0.81	215	0.55348	0.57722

## Sheet: mDC
Supplementary Table 6. Dendritic cell recluster GO results --mDC
GO.ID	Term	Annotated	Significant	Expected	Rank in Fisher.classic	Fisher.elim	Fisher.classic
GO:0060333	interferon-gamma-mediated signaling path...	77	9	0.61	15	8.9e-09	1.2e-08
GO:0043312	neutrophil degranulation	406	17	3.24	19	1.8e-08	3.2e-08
GO:0019886	antigen processing and presentation of e...	88	8	0.7	41	4.5e-07	5.9e-07
GO:0002250	adaptive immune response	355	14	2.83	47	2.4e-05	1.2e-06
GO:0046596	regulation of viral entry into host cell	26	4	0.21	72	4.8e-05	5.6e-05
GO:0060749	mammary gland alveolus development	12	3	0.1	82	0.0001	0.00011
GO:0002643	regulation of tolerance induction	14	3	0.11	92	0.00016	0.00018
GO:0042742	defense response to bacterium	137	8	1.09	62	0.00022	1.7e-05
GO:0050765	negative regulation of phagocytosis	17	3	0.14	106	0.0003	0.00034
GO:0090316	positive regulation of intracellular pro...	165	7	1.32	114	0.00033	0.00041
GO:0048026	positive regulation of mRNA splicing	20	3	0.16	119	0.0005	0.00055
GO:0050852	T cell receptor signaling pathway	182	7	1.45	137	0.0006	0.00074
GO:0050776	regulation of immune response	733	22	5.85	31	0.00075	1e-07
GO:0033598	mammary gland epithelial cell proliferat...	24	3	0.19	146	0.00086	0.00096
GO:1903749	positive regulation of establishment of ...	54	4	0.43	149	0.00086	0.00099
GO:1902624	positive regulation of neutrophil migrat...	25	3	0.2	151	0.00097	0.00108
GO:1903902	positive regulation of viral life cycle	56	4	0.45	154	0.00099	0.00113
GO:0006955	immune response	1557	45	12.42	1	0.00117	4.2e-15
GO:0051099	positive regulation of binding	153	6	1.22	180	0.00134	0.00161
GO:0051085	chaperone cofactor-dependent protein ref...	28	3	0.22	174	0.00136	0.00151
GO:0046824	positive regulation of nucleocytoplasmic...	61	4	0.49	176	0.00136	0.00156
GO:0008584	male gonad development	104	5	0.83	181	0.00139	0.00164
GO:0045648	positive regulation of erythrocyte diffe...	29	3	0.23	183	0.00151	0.00168
GO:0032355	response to estradiol	108	5	0.86	192	0.00165	0.00193
GO:0032735	positive regulation of interleukin-12 pr...	30	3	0.24	190	0.00167	0.00185
GO:1903047	mitotic cell cycle process	812	15	6.48	218	0.00177	0.00255
GO:0006952	defense response	1191	32	9.5	8	0.00183	9.1e-10
GO:0050829	defense response to Gram-negative bacter...	31	3	0.25	196	0.00184	0.00204
GO:0006334	nucleosome assembly	112	5	0.89	206	0.00193	0.00227
GO:0034109	homotypic cell-cell adhesion	67	4	0.53	203	0.00193	0.00221
GO:0002449	lymphocyte mediated immunity	222	9	1.77	75	0.0022	8.7e-05
GO:1904031	positive regulation of cyclin-dependent ...	33	3	0.26	213	0.00221	0.00245
GO:0010712	regulation of collagen metabolic process	33	3	0.26	214	0.00221	0.00245
GO:0043280	positive regulation of cysteine-type end...	116	5	0.93	224	0.00225	0.00264
GO:0006986	response to unfolded protein	170	6	1.36	228	0.00229	0.00274
GO:0042493	response to drug	298	8	2.38	245	0.00249	0.00313
GO:0048708	astrocyte differentiation	72	4	0.57	233	0.00252	0.00287
GO:0043123	positive regulation of I-kappaB kinase/N...	174	6	1.39	242	0.00257	0.00308
GO:2000341	regulation of chemokine (C-X-C motif) li...	10	2	0.08	234	0.00267	0.00287
GO:0002604	regulation of dendritic cell antigen pro...	10	2	0.08	235	0.00267	0.00287
GO:0016045	detection of bacterium	10	2	0.08	236	0.00267	0.00287
GO:0045657	positive regulation of monocyte differen...	10	2	0.08	237	0.00267	0.00287
GO:0032070	regulation of deoxyribonuclease activity	10	2	0.08	238	0.00267	0.00287
GO:0006979	response to oxidative stress	376	9	3	263	0.00294	0.00375
GO:1901701	cellular response to oxygen-containing c...	946	16	7.55	281	0.00303	0.00438
GO:0032496	response to lipopolysaccharide	243	7	1.94	269	0.00314	0.00385
GO:0031347	regulation of defense response	532	11	4.25	280	0.00321	0.00425
GO:2001198	regulation of dendritic cell differentia...	11	2	0.09	254	0.00325	0.00349
GO:0045581	negative regulation of T cell differenti...	38	3	0.3	259	0.00332	0.00367
GO:1901361	organic cyclic compound catabolic proces...	562	13	4.48	134	0.00336	0.00068
GO:0010324	membrane invagination	78	4	0.62	267	0.00337	0.00383
GO:0045087	innate immune response	661	20	5.27	37	0.00345	3.7e-07
GO:0032649	regulation of interferon-gamma productio...	79	4	0.63	272	0.00352	0.00401
GO:0032101	regulation of response to external stimu...	788	14	6.29	301	0.00361	0.00503
GO:0032069	regulation of nuclease activity	22	4	0.18	63	0.00375	2.8e-05
GO:0043254	regulation of protein-containing complex...	391	9	3.12	287	0.0038	0.00483
GO:0010917	negative regulation of mitochondrial mem...	12	2	0.1	276	0.00388	0.00417
GO:0051412	response to corticosterone	12	2	0.1	277	0.00388	0.00417
GO:0042129	regulation of T cell proliferation	135	5	1.08	302	0.00433	0.00505
GO:0002831	regulation of response to biotic stimulu...	327	8	2.61	311	0.00438	0.00546
GO:0050871	positive regulation of B cell activation	84	4	0.67	298	0.00439	0.005
GO:0032757	positive regulation of interleukin-8 pro...	42	3	0.34	288	0.00441	0.00488
GO:0002437	inflammatory response to antigenic stimu...	42	3	0.34	289	0.00441	0.00488
GO:0033151	V(D)J recombination	13	2	0.1	291	0.00456	0.0049
GO:0002697	regulation of immune effector process	332	8	2.65	333	0.0048	0.00597
GO:1901028	regulation of mitochondrial outer membra...	44	3	0.35	313	0.00503	0.00557
GO:0032653	regulation of interleukin-10 production	44	3	0.35	314	0.00503	0.00557
GO:0050679	positive regulation of epithelial cell p...	140	5	1.12	326	0.00505	0.00588
GO:2001237	negative regulation of extrinsic apoptot...	88	4	0.7	327	0.00518	0.00589
GO:1903039	positive regulation of leukocyte cell-ce...	201	6	1.6	335	0.00521	0.0062
GO:0043518	negative regulation of DNA damage respon...	14	2	0.11	319	0.0053	0.00569
GO:0019835	cytolysis	14	2	0.11	320	0.0053	0.00569
GO:0035751	regulation of lysosomal lumen pH	14	2	0.11	321	0.0053	0.00569
GO:0070486	leukocyte aggregation	14	2	0.11	322	0.0053	0.00569
GO:1901836	regulation of transcription of nucleolar...	14	2	0.11	323	0.0053	0.00569
GO:0048584	positive regulation of response to stimu...	1858	34	14.83	51	0.00548	3.1e-06
GO:0051496	positive regulation of stress fiber asse...	47	3	0.38	347	0.00605	0.00669
GO:0070233	negative regulation of T cell apoptotic ...	15	2	0.12	338	0.00608	0.00652
GO:0060263	regulation of respiratory burst	15	2	0.12	339	0.00608	0.00652
GO:0002830	positive regulation of type 2 immune res...	15	2	0.12	340	0.00608	0.00652
GO:0042402	cellular biogenic amine catabolic proces...	15	2	0.12	341	0.00608	0.00652
GO:1902166	negative regulation of intrinsic apoptot...	15	2	0.12	342	0.00608	0.00652
GO:0071157	negative regulation of cell cycle arrest	15	2	0.12	343	0.00608	0.00652
GO:0033554	cellular response to stress	1854	26	14.79	265	0.00632	0.00376
GO:0046700	heterocycle catabolic process	530	12	4.23	164	0.00653	0.00133
GO:0044270	cellular nitrogen compound catabolic pro...	532	12	4.25	168	0.0067	0.00138
GO:0001818	negative regulation of cytokine producti...	212	6	1.69	362	0.00671	0.00798
GO:0009615	response to virus	280	7	2.23	364	0.00677	0.00822
GO:0050830	defense response to Gram-positive bacter...	49	3	0.39	357	0.0068	0.00752
GO:0002455	humoral immune response mediated by circ...	49	3	0.39	358	0.0068	0.00752
GO:0019439	aromatic compound catabolic process	542	12	4.32	179	0.00764	0.00161
GO:0033209	tumor necrosis factor-mediated signaling...	155	5	1.24	376	0.00771	0.00895
GO:0006266	DNA ligation	17	2	0.14	366	0.0078	0.00836
GO:0046135	pyrimidine nucleoside catabolic process	17	2	0.14	367	0.0078	0.00836
GO:0050663	cytokine secretion	53	3	0.42	384	0.00845	0.00934
GO:0031342	negative regulation of cell killing	18	2	0.14	386	0.00872	0.00936
GO:2000678	negative regulation of transcription reg...	18	2	0.14	387	0.00872	0.00936
GO:0006909	phagocytosis	248	9	1.98	96	0.00884	0.0002
GO:0006956	complement activation	54	3	0.43	391	0.0089	0.00983
GO:0022617	extracellular matrix disassembly	54	3	0.43	392	0.0089	0.00983
GO:0031329	regulation of cellular catabolic process	790	13	6.3	428	0.00937	0.01254
GO:0030183	B cell differentiation	105	4	0.84	408	0.00959	0.01086
GO:0045814	negative regulation of gene expression …	105	4	0.84	409	0.00959	0.01086
GO:0019883	antigen processing and presentation of e...	19	2	0.15	401	0.0097	0.0104
GO:0002695	negative regulation of leukocyte activat...	148	7	1.18	101	0.01031	0.00021
GO:0030865	cortical cytoskeleton organization	57	3	0.45	414	0.01032	0.01139
GO:0002768	immune response-regulating cell surface ...	359	12	2.86	65	0.01061	3.8e-05
GO:0046827	positive regulation of protein export fr...	20	2	0.16	416	0.01072	0.0115
GO:0032967	positive regulation of collagen biosynth...	20	2	0.16	417	0.01072	0.0115
GO:0051131	chaperone-mediated protein complex assem...	20	2	0.16	418	0.01072	0.0115
GO:0045861	negative regulation of proteolysis	236	6	1.88	434	0.01107	0.01308
GO:0002764	immune response-regulating signaling pat...	362	12	2.89	66	0.01136	4.1e-05
GO:0043488	regulation of mRNA stability	172	5	1.37	440	0.01175	0.01359
GO:0006309	apoptotic DNA fragmentation	21	2	0.17	430	0.01179	0.01264
GO:0010714	positive regulation of collagen metaboli...	21	2	0.17	431	0.01179	0.01264
GO:0071456	cellular response to hypoxia	173	5	1.38	449	0.01203	0.01391
GO:0010822	positive regulation of mitochondrion org...	113	4	0.9	451	0.01232	0.01392
GO:0006911	phagocytosis engulfment	61	3	0.49	441	0.01241	0.01368
GO:0050921	positive regulation of chemotaxis	114	4	0.91	454	0.01269	0.01434
GO:0051129	negative regulation of cellular componen...	644	11	5.14	474	0.01283	0.01651
GO:0032103	positive regulation of response to exter...	394	8	3.14	465	0.01284	0.01572
GO:0071624	positive regulation of granulocyte chemo...	22	2	0.18	446	0.0129	0.01383
GO:0007035	vacuolar acidification	22	2	0.18	447	0.0129	0.01383
GO:0090023	positive regulation of neutrophil chemot...	22	2	0.18	448	0.0129	0.01383
GO:0006342	chromatin silencing	62	3	0.49	453	0.01297	0.01429
GO:0034655	nucleobase-containing compound catabolic...	503	11	4.01	229	0.01331	0.00278
GO:0002460	adaptive immune response based on somati...	231	8	1.84	124	0.01334	0.00062
GO:0045088	regulation of innate immune response	246	6	1.96	466	0.01337	0.01576
GO:0071310	cellular response to organic substance	2168	36	17.3	59	0.01342	1.4e-05
GO:0043207	response to external biotic stimulus	1056	33	8.43	3	0.01354	8.3e-12
GO:0051707	response to other organism	1056	33	8.43	4	0.01354	8.3e-12
GO:0032507	maintenance of protein location in cell	63	3	0.5	458	0.01354	0.01492
GO:0043487	regulation of RNA stability	179	5	1.43	467	0.01378	0.01591
GO:0016064	immunoglobulin mediated immune response	114	6	0.91	107	0.01379	0.00035
GO:0031579	membrane raft organization	23	2	0.18	459	0.01406	0.01507
GO:0031333	negative regulation of protein-containin...	118	4	0.94	470	0.01425	0.01609
GO:0097549	chromatin organization involved in negat...	119	4	0.95	475	0.01466	0.01654
GO:0038093	Fc receptor signaling pathway	182	5	1.45	478	0.01471	0.01697
GO:0019724	B cell mediated immunity	116	6	0.93	109	0.01496	0.00038
GO:0043281	regulation of cysteine-type endopeptidas...	184	8	1.47	86	0.01498	0.00013
GO:0036294	cellular response to decreased oxygen le...	183	5	1.46	482	0.01503	0.01734
GO:0042177	negative regulation of protein catabolic...	120	4	0.96	479	0.01507	0.01701
GO:0050715	positive regulation of cytokine secretio...	24	2	0.19	471	0.01526	0.01635
GO:0032689	negative regulation of interferon-gamma ...	24	2	0.19	472	0.01526	0.01635
GO:0050777	negative regulation of immune response	121	4	0.97	483	0.01549	0.01748
GO:0009617	response to bacterium	428	18	3.42	14	0.01553	1.1e-08
GO:0050870	positive regulation of T cell activation	185	5	1.48	491	0.01568	0.01809
GO:0050866	negative regulation of cell activation	163	7	1.3	111	0.01586	0.00038
GO:0032272	negative regulation of protein polymeriz...	67	3	0.53	484	0.01597	0.01758
GO:0007346	regulation of mitotic cell cycle	578	10	4.61	512	0.01606	0.02024
GO:0001678	cellular glucose homeostasis	123	4	0.98	492	0.01636	0.01845
GO:1900740	positive regulation of protein insertion...	25	2	0.2	487	0.0165	0.01768
GO:1900739	regulation of protein insertion into mit...	25	2	0.2	488	0.0165	0.01768
GO:0043393	regulation of protein binding	188	5	1.5	506	0.0167	0.01925
GO:1902107	positive regulation of leukocyte differe...	137	6	1.09	142	0.01714	0.00091
GO:0051222	positive regulation of protein transport	297	11	2.37	64	0.01723	3.2e-05
GO:0048678	response to axon injury	69	3	0.55	497	0.01727	0.019
GO:0034599	cellular response to oxidative stress	261	6	2.08	514	0.01742	0.02046
GO:0061013	regulation of mRNA catabolic process	191	5	1.52	513	0.01776	0.02046
GO:0006910	phagocytosis recognition	26	2	0.21	499	0.01779	0.01905
GO:0031640	killing of cells of other organism	26	2	0.21	500	0.01779	0.01905
GO:0030431	sleep	26	2	0.21	501	0.01779	0.01905
GO:0099024	plasma membrane invagination	70	3	0.56	508	0.01794	0.01974
GO:0008637	apoptotic mitochondrial changes	116	6	0.93	110	0.0181	0.00038
GO:0050778	positive regulation of immune response	536	17	4.28	48	0.01833	1.6e-06
GO:0051100	negative regulation of binding	148	6	1.18	165	0.01855	0.00136
GO:0043535	regulation of blood vessel endothelial c...	71	3	0.57	520	0.01862	0.02049
GO:0050853	B cell receptor signaling pathway	71	3	0.57	521	0.01862	0.02049
GO:0001776	leukocyte homeostasis	71	3	0.57	522	0.01862	0.02049
GO:0043154	negative regulation of cysteine-type end...	71	3	0.57	523	0.01862	0.02049
GO:0031647	regulation of protein stability	266	6	2.12	543	0.01894	0.02222
GO:0052547	regulation of peptidase activity	318	10	2.54	104	0.01896	0.00028
GO:0045577	regulation of B cell differentiation	27	2	0.22	516	0.01911	0.02046
GO:0010594	regulation of endothelial cell migration	129	4	1.03	529	0.01915	0.02156
GO:0080134	regulation of response to stress	1205	23	9.62	80	0.01932	9.9e-05
GO:0071357	cellular response to type I interferon	72	3	0.57	526	0.01933	0.02126
GO:0060337	type I interferon signaling pathway	72	3	0.57	527	0.01933	0.02126
GO:0006338	chromatin remodeling	196	5	1.56	545	0.01963	0.02258
GO:0098542	defense response to other organism	795	25	6.34	13	0.02008	4.4e-09
GO:0010638	positive regulation of organelle organiz...	573	12	4.57	219	0.02027	0.00256
GO:0071453	cellular response to oxygen levels	198	5	1.58	562	0.02041	0.02347
GO:1901099	negative regulation of signal transducti...	28	2	0.22	532	0.02048	0.02192
GO:0030262	apoptotic nuclear changes	28	2	0.22	533	0.02048	0.02192
GO:0006335	DNA replication-dependent nucleosome ass...	28	2	0.22	534	0.02048	0.02192
GO:0043537	negative regulation of blood vessel endo...	28	2	0.22	535	0.02048	0.02192
GO:0030574	collagen catabolic process	28	2	0.22	536	0.02048	0.02192
GO:0034723	DNA replication-dependent nucleosome org...	28	2	0.22	537	0.02048	0.02192
GO:0000737	DNA catabolic process endonucleolytic	28	2	0.22	538	0.02048	0.02192
GO:0090022	regulation of neutrophil chemotaxis	28	2	0.22	539	0.02048	0.02192
GO:2001240	negative regulation of extrinsic apoptot...	28	2	0.22	540	0.02048	0.02192
GO:0050714	positive regulation of protein secretion	132	4	1.05	550	0.02064	0.02323
GO:0034401	chromatin organization involved in regul...	132	4	1.05	551	0.02064	0.02323
GO:0033138	positive regulation of peptidyl-serine p...	74	3	0.59	546	0.02077	0.02284
GO:0007163	establishment or maintenance of cell pol...	199	5	1.59	566	0.02081	0.02392
GO:0034976	response to endoplasmic reticulum stress	272	6	2.17	569	0.02088	0.02446
GO:0006919	activation of cysteine-type endopeptidas...	75	3	0.6	564	0.02151	0.02365
GO:1902749	regulation of cell cycle G2/M phase tran...	201	5	1.6	574	0.02162	0.02484
GO:0032965	regulation of collagen biosynthetic proc...	29	2	0.23	552	0.02188	0.02342
GO:0010165	response to X-ray	29	2	0.23	553	0.02188	0.02342
GO:0044319	wound healing spreading of cells	29	2	0.23	554	0.02188	0.02342
GO:0023026	MHC class II protein complex binding	16	6	0.13	1	1.6e-09	2e-09
GO:0042605	peptide antigen binding	18	6	0.14	2	3.8e-09	4.7e-09
GO:0003723	RNA binding	1537	30	12.32	6	2.1e-06	4.6e-06
GO:0140375	immune receptor activity	94	6	0.75	8	0.0001	0.00012
GO:0005200	structural constituent of cytoskeleton	73	5	0.59	9	0.00028	0.00033
GO:0000979	RNA polymerase II core promoter sequence...	21	3	0.17	10	0.00058	0.00065
GO:0019901	protein kinase binding	592	13	4.75	15	0.00083	0.00115
GO:0044183	protein folding chaperone	24	3	0.19	12	0.00087	0.00097
GO:0048306	calcium-dependent protein binding	55	4	0.44	13	0.00094	0.00108
GO:0051082	unfolded protein binding	99	5	0.79	16	0.00114	0.00134
GO:0019887	protein kinase regulator activity	161	6	1.29	18	0.00178	0.00214
GO:0042287	MHC protein binding	32	3	0.26	19	0.00205	0.00226
GO:0031492	nucleosomal DNA binding	36	3	0.29	20	0.00288	0.00318
GO:0008301	DNA binding bending	11	2	0.09	22	0.00328	0.00352
GO:0005525	GTP binding	324	8	2.6	26	0.00429	0.00531
GO:0050998	nitric-oxide synthase binding	13	2	0.1	24	0.00461	0.00494
GO:0044548	S100 protein binding	14	2	0.11	28	0.00535	0.00573
GO:0048156	tau protein binding	45	3	0.36	29	0.00543	0.006
GO:0005515	protein binding	10921	103	87.55	14	0.0056	0.0011
GO:0046983	protein dimerization activity	827	14	6.63	37	0.00581	0.00792
GO:0042802	identical protein binding	1587	22	12.72	41	0.00633	0.00964
GO:0005102	signaling receptor binding	1179	20	9.45	17	0.00693	0.00144
GO:0030247	polysaccharide binding	16	2	0.13	36	0.00698	0.00748
GO:0000400	four-way junction DNA binding	17	2	0.14	38	0.00787	0.00843
GO:0008320	protein transmembrane transporter activi...	18	2	0.14	39	0.00881	0.00943
GO:0042826	histone deacetylase binding	104	4	0.83	43	0.00945	0.01066
GO:0070182	DNA polymerase binding	19	2	0.15	42	0.00979	0.01048
GO:0045296	cadherin binding	304	7	2.44	49	0.01068	0.01282
GO:0070412	R-SMAD binding	20	2	0.16	45	0.01083	0.01158
GO:0042056	chemoattractant activity	20	2	0.16	46	0.01083	0.01158
GO:0034987	immunoglobulin receptor binding	20	2	0.16	47	0.01083	0.01158
GO:0043236	laminin binding	22	2	0.18	50	0.01303	0.01393
GO:0044325	ion channel binding	115	4	0.92	51	0.01329	0.01497
GO:0005125	cytokine activity	121	4	0.97	53	0.01576	0.01772
GO:0003785	actin monomer binding	25	2	0.2	54	0.01666	0.01781
GO:0003725	double-stranded RNA binding	70	3	0.56	55	0.01818	0.01995
GO:0046982	protein heterodimerization activity	264	6	2.12	57	0.01874	0.0219
GO:0005154	epidermal growth factor receptor binding	28	2	0.22	58	0.02067	0.02208
GO:0042277	peptide binding	228	11	1.83	5	0.02116	2.8e-06
GO:0097718	disordered domain specific binding	29	2	0.23	59	0.02209	0.02359
GO:0008144	drug binding	76	3	0.61	60	0.02256	0.02474
GO:0003924	GTPase activity	281	6	2.25	62	0.02458	0.02861
GO:0004869	cysteine-type endopeptidase inhibitor ac...	34	2	0.27	63	0.02975	0.03175
GO:0019904	protein domain specific binding	637	10	5.11	66	0.0301	0.03712
GO:0004601	peroxidase activity	37	2	0.3	65	0.03478	0.0371
GO:0016616	oxidoreductase activity acting on the C…	91	3	0.73	67	0.03583	0.03915
GO:0050839	cell adhesion molecule binding	477	8	3.82	71	0.03619	0.04319
GO:0003823	antigen binding	59	8	0.47	3	0.03803	2.6e-08
GO:0051087	chaperone binding	94	3	0.75	68	0.03887	0.04245
GO:0001102	RNA polymerase II activating transcripti...	40	2	0.32	70	0.04011	0.04276
GO:0016684	oxidoreductase activity acting on perox…	41	2	0.33	72	0.04196	0.04472
GO:0030246	carbohydrate binding	184	6	1.48	23	0.04262	0.00414
GO:0016614	oxidoreductase activity acting on CH-OH…	98	3	0.79	75	0.04312	0.04706
GO:0050840	extracellular matrix binding	42	2	0.34	73	0.04383	0.04671
GO:0003697	single-stranded DNA binding	107	3	0.86	77	0.0535	0.05829
GO:0033218	amide binding	289	11	2.32	7	0.05378	2.6e-05
GO:0000287	magnesium ion binding	183	4	1.47	79	0.05804	0.06441
GO:0048018	receptor ligand activity	264	5	2.12	80	0.05933	0.06697
GO:0004888	transmembrane signaling receptor activit...	530	8	4.25	82	0.06022	0.071
GO:0030546	signaling receptor activator activity	268	5	2.15	81	0.06246	0.07045
GO:0003729	mRNA binding	269	5	2.16	84	0.06326	0.07133
GO:0042803	protein homodimerization activity	541	8	4.34	86	0.06623	0.0779
GO:0097110	scaffold protein binding	56	2	0.45	85	0.07303	0.07763
GO:0008134	transcription factor binding	553	8	4.43	93	0.07321	0.08587
GO:0030957	Tat protein binding	10	1	0.08	87	0.07669	0.07935
GO:0008253	5'-nucleotidase activity	10	1	0.08	88	0.07669	0.07935
GO:0051400	BH domain binding	10	1	0.08	89	0.07669	0.07935
GO:0099186	structural constituent of postsynapse	10	1	0.08	90	0.07669	0.07935
GO:0070513	death domain binding	10	1	0.08	91	0.07669	0.07935
GO:0005518	collagen binding	58	2	0.46	92	0.0776	0.08246
GO:0005049	nuclear export signal receptor activity	11	1	0.09	94	0.08403	0.08694
GO:0005212	structural constituent of eye lens	11	1	0.09	95	0.08403	0.08694
GO:0017017	MAP kinase tyrosine/serine/threonine pho...	11	1	0.09	96	0.08403	0.08694
GO:0016290	palmitoyl-CoA hydrolase activity	11	1	0.09	97	0.08403	0.08694
GO:0008474	palmitoyl-(protein) hydrolase activity	11	1	0.09	98	0.08403	0.08694
GO:0016668	oxidoreductase activity acting on a sul…	11	1	0.09	99	0.08403	0.08694
GO:0098599	palmitoyl hydrolase activity	11	1	0.09	100	0.08403	0.08694
GO:0030545	receptor regulator activity	295	5	2.36	107	0.08601	0.09645
GO:0003684	damaged DNA binding	62	2	0.5	101	0.08701	0.09239
GO:0016853	isomerase activity	133	3	1.07	108	0.0894	0.0969
GO:0016787	hydrolase activity	1956	21	15.68	132	0.09019	0.11955
GO:0008252	nucleotidase activity	12	1	0.1	102	0.09132	0.09446
GO:0070742	C2H2 zinc finger domain binding	12	1	0.1	103	0.09132	0.09446
GO:0043295	glutathione binding	12	1	0.1	104	0.09132	0.09446
GO:0033549	MAP kinase phosphatase activity	12	1	0.1	105	0.09132	0.09446
GO:0016722	oxidoreductase activity oxidizing metal…	12	1	0.1	106	0.09132	0.09446
GO:0016209	antioxidant activity	65	2	0.52	109	0.09427	0.10006
GO:0033613	activating transcription factor binding	66	2	0.53	112	0.09673	0.10265
GO:0030295	protein kinase activator activity	66	2	0.53	113	0.09673	0.10265
GO:0051428	peptide hormone receptor binding	13	1	0.1	110	0.09854	0.10192
GO:1900750	oligopeptide binding	13	1	0.1	111	0.09854	0.10192
GO:0140297	DNA-binding transcription factor binding	308	5	2.47	121	0.09881	0.11051
GO:0019210	kinase inhibitor activity	67	2	0.54	116	0.09921	0.10526
GO:0004896	cytokine receptor activity	69	2	0.55	122	0.10422	0.11054
GO:0047617	acyl-CoA hydrolase activity	14	1	0.11	118	0.10571	0.10932
GO:0016018	cyclosporin A binding	14	1	0.11	119	0.10571	0.10932
GO:0042809	vitamin D receptor binding	14	1	0.11	120	0.10571	0.10932
GO:0046332	SMAD binding	71	2	0.57	123	0.1093	0.11588
GO:0019209	kinase activator activity	72	2	0.58	131	0.11186	0.11858
GO:0016702	oxidoreductase activity acting on singl…	15	1	0.12	124	0.11282	0.11666
GO:0098641	cadherin binding involved in cell-cell a...	15	1	0.12	125	0.11282	0.11666
GO:0019198	transmembrane receptor protein phosphata...	15	1	0.12	126	0.11282	0.11666
GO:0005001	transmembrane receptor protein tyrosine ...	15	1	0.12	127	0.11282	0.11666
GO:0019865	immunoglobulin binding	15	1	0.12	128	0.11282	0.11666
GO:0010314	phosphatidylinositol-5-phosphate binding	15	1	0.12	129	0.11282	0.11666
GO:0005540	hyaluronic acid binding	15	1	0.12	130	0.11282	0.11666
GO:0072341	modified amino acid binding	73	2	0.59	133	0.11444	0.12129
GO:0001540	amyloid-beta binding	73	2	0.59	134	0.11444	0.12129
GO:0016289	CoA hydrolase activity	16	1	0.13	135	0.11988	0.12394
GO:0016701	oxidoreductase activity acting on singl…	16	1	0.13	136	0.11988	0.12394
GO:0031683	G-protein beta/gamma-subunit complex bin...	16	1	0.13	137	0.11988	0.12394
GO:0098918	structural constituent of synapse	16	1	0.13	138	0.11988	0.12394
GO:0004602	glutathione peroxidase activity	16	1	0.13	139	0.11988	0.12394
GO:0070064	proline-rich region binding	16	1	0.13	140	0.11988	0.12394
GO:0061629	RNA polymerase II-specific DNA-binding t...	239	4	1.92	142	0.12271	0.13466
GO:0051219	phosphoprotein binding	77	2	0.62	141	0.12491	0.13229
GO:0003713	transcription coactivator activity	244	4	1.96	145	0.12957	0.14205
GO:0016462	pyrophosphatase activity	735	9	5.89	150	0.13004	0.1515
GO:0016817	hydrolase activity acting on acid anhyd…	738	9	5.92	156	0.13236	0.15411
GO:0016818	hydrolase activity acting on acid anhyd…	738	9	5.92	157	0.13236	0.15411
GO:0070034	telomerase RNA binding	18	1	0.14	143	0.13383	0.13832
GO:0004364	glutathione transferase activity	18	1	0.14	144	0.13383	0.13832
GO:0001530	lipopolysaccharide binding	19	1	0.15	148	0.14072	0.14542
GO:0042288	MHC class I protein binding	19	1	0.15	149	0.14072	0.14542
GO:0004298	threonine-type endopeptidase activity	20	1	0.16	151	0.14755	0.15246
GO:0071855	neuropeptide receptor binding	20	1	0.16	152	0.14755	0.15246
GO:0001968	fibronectin binding	20	1	0.16	153	0.14755	0.15246
GO:0033764	steroid dehydrogenase activity acting o…	20	1	0.16	154	0.14755	0.15246
GO:0051861	glycolipid binding	20	1	0.16	155	0.14755	0.15246
GO:0003712	transcription coregulator activity	450	6	3.61	162	0.14849	0.16664
GO:0004857	enzyme inhibitor activity	258	4	2.07	161	0.14961	0.16357
GO:0004725	protein tyrosine phosphatase activity	87	2	0.7	160	0.15198	0.16069
GO:0008198	ferrous iron binding	21	1	0.17	158	0.15434	0.15945
GO:0043027	cysteine-type endopeptidase inhibitor ac...	21	1	0.17	159	0.15434	0.15945
GO:0008236	serine-type peptidase activity	92	2	0.74	164	0.16592	0.17528
GO:0004866	endopeptidase inhibitor activity	92	2	0.74	165	0.16592	0.17528
GO:0016229	steroid dehydrogenase activity	23	1	0.18	163	0.16774	0.17325
GO:0030414	peptidase inhibitor activity	93	2	0.75	167	0.16874	0.17823
GO:0019239	deaminase activity	24	1	0.19	168	0.17436	0.18007
GO:0070003	threonine-type peptidase activity	24	1	0.19	169	0.17436	0.18007
GO:0070273	phosphatidylinositol-4-phosphate binding	24	1	0.19	170	0.17436	0.18007
GO:0043325	phosphatidylinositol-34-bisphosphate bi…	24	1	0.19	171	0.17436	0.18007
GO:0080025	phosphatidylinositol-35-bisphosphate bi…	24	1	0.19	172	0.17436	0.18007
GO:0017171	serine hydrolase activity	95	2	0.76	173	0.17439	0.18414
GO:0099106	ion channel regulator activity	95	2	0.76	174	0.17439	0.18414
GO:0016491	oxidoreductase activity	579	7	4.64	189	0.17726	0.20004
GO:0019955	cytokine binding	97	2	0.78	179	0.18008	0.19008
GO:0008083	growth factor activity	97	2	0.78	180	0.18008	0.19008
GO:0017111	nucleoside-triphosphatase activity	688	8	5.52	191	0.18077	0.20592
GO:0019956	chemokine binding	25	1	0.2	177	0.18093	0.18683
GO:0016866	intramolecular transferase activity	25	1	0.2	178	0.18093	0.18683
GO:0070851	growth factor receptor binding	98	2	0.79	181	0.18293	0.19306
GO:0005543	phospholipid binding	380	5	3.05	190	0.18496	0.20388
GO:1902936	phosphatidylinositol bisphosphate bindin...	99	2	0.79	186	0.18579	0.19604
GO:0019207	kinase regulator activity	188	7	1.51	11	0.18638	0.00092
GO:0051787	misfolded protein binding	26	1	0.21	182	0.18745	0.19353
GO:0048027	mRNA 5'-UTR binding	26	1	0.21	183	0.18745	0.19353
GO:0016814	hydrolase activity acting on carbon-nit…	26	1	0.21	184	0.18745	0.19353
GO:0015662	ion transmembrane transporter activity …	26	1	0.21	185	0.18745	0.19353
GO:0047485	protein N-terminus binding	100	2	0.8	187	0.18866	0.19904
GO:0061135	endopeptidase regulator activity	100	2	0.8	188	0.18866	0.19904
GO:0002020	protease binding	104	2	0.83	194	0.20018	0.21106
GO:0046966	thyroid hormone receptor binding	28	1	0.22	192	0.20034	0.20678
GO:0004180	carboxypeptidase activity	28	1	0.22	193	0.20034	0.20678
GO:0030515	snoRNA binding	29	1	0.23	195	0.2067	0.21332
GO:0140142	nucleocytoplasmic carrier activity	30	1	0.24	197	0.21302	0.21981
GO:0017080	sodium channel regulator activity	30	1	0.24	198	0.21302	0.21981
GO:0030291	protein serine/threonine kinase inhibito...	30	1	0.24	199	0.21302	0.21981
GO:0008233	peptidase activity	404	5	3.24	206	0.21844	0.23968
GO:0051019	mitogen-activated protein kinase binding	31	1	0.25	200	0.21929	0.22625
GO:0043394	proteoglycan binding	31	1	0.25	201	0.21929	0.22625
GO:0003755	peptidyl-prolyl cis-trans isomerase acti...	31	1	0.25	202	0.21929	0.22625
GO:0043539	protein serine/threonine kinase activato...	32	1	0.26	203	0.2255	0.23263
GO:0016790	thiolester hydrolase activity	32	1	0.26	204	0.2255	0.23263
GO:0016859	cis-trans isomerase activity	33	1	0.26	205	0.23167	0.23896
GO:0031072	heat shock protein binding	116	2	0.93	211	0.23519	0.24748
GO:0042162	telomeric DNA binding	34	1	0.27	208	0.23779	0.24524
GO:0016247	channel regulator activity	119	2	0.95	213	0.244	0.25663
GO:0140101	catalytic activity acting on a tRNA	119	2	0.95	214	0.244	0.25663
GO:0005246	calcium channel regulator activity	36	1	0.29	215	0.24988	0.25765
GO:0008138	protein tyrosine/serine/threonine phosph...	37	1	0.3	216	0.25586	0.26377
GO:0036002	pre-mRNA binding	38	1	0.3	217	0.26179	0.26985
GO:0043028	cysteine-type endopeptidase regulator ac...	38	1	0.3	218	0.26179	0.26985
GO:0015036	disulfide oxidoreductase activity	38	1	0.3	219	0.26179	0.26985
GO:0097367	carbohydrate derivative binding	1855	22	14.87	76	0.26286	0.04782
GO:0016875	ligase activity forming carbon-oxygen b…	39	1	0.31	220	0.26767	0.27588
GO:0005544	calcium-dependent phospholipid binding	39	1	0.31	221	0.26767	0.27588
GO:0004812	aminoacyl-tRNA ligase activity	39	1	0.31	222	0.26767	0.27588
GO:0032266	phosphatidylinositol-3-phosphate binding	40	1	0.32	223	0.2735	0.28185
GO:0019894	kinesin binding	40	1	0.32	224	0.2735	0.28185
GO:0016860	intramolecular oxidoreductase activity	41	1	0.33	225	0.27929	0.28778
GO:0061134	peptidase regulator activity	132	2	1.06	226	0.2823	0.2963
GO:0098632	cell-cell adhesion mediator activity	43	1	0.34	227	0.29073	0.29949
GO:0016791	phosphatase activity	237	3	1.9	230	0.29126	0.30982
GO:0001786	phosphatidylserine binding	44	1	0.35	228	0.29638	0.30528
GO:0015459	potassium channel regulator activity	44	1	0.35	229	0.29638	0.30528
GO:0016538	cyclin-dependent protein serine/threonin...	45	1	0.36	231	0.30199	0.31101
GO:0005080	protein kinase C binding	45	1	0.36	232	0.30199	0.31101
GO:0003682	chromatin binding	512	8	4.1	78	0.30935	0.06056
GO:0016765	transferase activity transferring alkyl…	47	1	0.38	233	0.31307	0.32235
